# Supplementary material for: Coalescing beneficial host and deleterious antiparasitic actions as an antischistosomal strategy
Source: eLife. 2018 Jul 30;7:e35755. doi: 10.7554/eLife.35755 (PMC6095690; doi:10.7554/eLife.35755)
Supplement: Supplementary file 1. — (Sheet 1) Vendor, chemical identification (SMILES) and primary screening data for all natural product compounds screened against Sm.5HTRL. (Sheet 2) Counter screening data for agonist primary hits in cells expressing the 22F cAMP GloSensor and lacking Sm.5HTRL. (Sheet 3) Counter screening data for antagonist primary hits in cells expressing the 22F cAMP GloSensor and lacking Sm.5HTRL. NPS = NCI Natural Products Set IV, NPL = TimTec Natural Product Library, NDL = TimTec Natural Derivatives Library. [file elife-35755-supp1.xlsx]

## Sheet: 1. Primary Screen
LIBRARY	NAME/ID	Sm.5HTRL agonism (fold change luminescence)	Sm.5HTRL antagonism (% of control 5-HT response)	SMILES	HIT
NPS	757	1.50194	1.22759	O=c1c(ccc2c3c(c(c(cc3CC[C@@H](c2c1)NC(=O)C)OC)OC)OC)OC
NPS	12097	0.634839	0.723806	o1c2c(nc3ccc(cc13)O)ccc(=O)c2
NPS	31048	1.31613	1.13757	c1(cc(C2CC(=O)c3c(cc(cc3O)OC3C(C(C(C(O3)CO)O)O)OC3C(C(C(C(O3)C)O)O)O)O2)ccc1OC)O
NPS	56464	1.99742	1.04158	N1(C2[C@@]34[C@@H]5C[C@]6([C@H](OC(=O)c7ccccc7)[C@@H]5[C@]([C@H]([C@@H]6OC)O)([C@H]2[C@@H]([C@@H]4[C@@]([C@@H](C[C@@H]3OC)O)(C1)COC)OC)OC(=O)C)O)CC
NPS	87511	0.634839	0.812499	O=Cc1c2Oc3c4C(OC(=O)c4c(c(c3OC(=O)c2c(cc1OC)C)C)O)O
NPS	133100	0.0774194	0.665635	O1[C@]2(Oc3c(c(c4c(c(cc(c4c3C2=O)O)NC(=O)/C(=C\C=C\[C@@H](C([C@H]([C@H]([C@H]([C@@H]([C@@H](C(/C=C/1)OC)C)OC(=O)C)C)O)C)O)C)/C)O)O)C)C.[Na+]
NPS	226080	0.510968	0.364195	[C@@H]1([C@@H](C[C@@H](CC1)C[C@H]([C@@H]1CC(=O)[C@@H](/C=C(/[C@H]([C@H](C(=O)[C@@H](C[C@@H](/C=C/C=C/C=C(/[C@H](C[C@@H]2CC[C@H]([C@](C(=O)C(=O)N3[C@H](C(=O)O1)CCCC3)(O2)O)C)OC)\C)C)C)OC)O)\C)C)C)OC)O
NPS	302289	0.696774	0.856938	C1C2C(C(=C)C(=O)O2)C=C2C1(CCCC2C)C
NPS	349438	0.696774	0.925399	c1occc1C(=O)CCC(O)C
NPS	637086	0.944516	0.924977	CC(=O)CCCCn1c(=O)c2c(n(c1=O)C)ncn2C
NPS	3716	1.25419	0.874334	C(=O)(O)CCC(=O)C
NPS	7533	1.44	1.01011	O1C(=O)C=C(C1)C1C2(C(CC3C(C2(CC1)O)CCC1C3(CCC(OC2OC(C(OC3OC(C(OC4OC(C(OC5OC(C(C(C5O)O)O)CO)C(C4)OC(=O)C)C)C(C3)O)C)C(C2)O)C)C1)C)O)C
NPS	9699	0.325161	0.946262	C1(=O)CCC2C1(CCC1C2CCc2c1ccc(c2)O)C
NPS	15624	1.13032	0.771559	[nH]1c2c(CCN3[C@H]2C[C@H]2[C@@H](C3)[C@@H](OC=C2C(=O)OC)C)c2ccc(cc12)OC
NPS	22939	1.19226	0.928826	c1(=O)c(ncc(n1O)C(CC)C)CC(C)C
NPS	31754	1.06839	0.963181	O=C1c2c(c(c(cc2C(=O)c2c1cccc2)O)O)O
NPS	36407	1.44	0.870419	O=C1OC[C@@H]2[C@H](c3cc4OCOc4cc3[C@H]([C@H]12)c1cc(c(c(c1)OC)OC)OC)O
NPS	46709	2.12129	0.862312	C(C)(C)CC(C(=O)O)N
NPS	62786	230.23	1.00507	[C@H](c1cc(c(cc1)O)O)(CNC)O	UNKNOWN
NPS	76627	1.13032	0.607901	[C@@H]1([C@@H]([C@H]([C@@](CCCCC/C=C/[C@H]2[C@](C[C@H]3[C@H]([C@@H](OC(=O)/C=C/[C@]([C@H]([C@@H]1C)O)(O)C)C[C@@]1(O3)O[C@H](CCC1)C[C@@H](CC)O)C)(OC(C2)(C)C)O)(O)C)O)OC1OC(C(CC1)N(C)C)C)O
NPS	7524	1.62581	1.12939	O1[C@]23C[C@]4([C@H]5[C@@]([C@@]([C@H]6N(C[C@H](CC6)C)C5)(O)C)([C@H](C[C@]4([C@@H]2CC[C@H]2[C@@]3(CC[C@@H]([C@]12O)OC(=O)c1cc(c(cc1)OC)OC)C)O)O)O)O
NPS	23969	1.25419	1.23607	C1C(N(C(CC1)/C=C/C1C2C(OC(=O)C2CC2C1CCCC2)C)C)C
NPS	36351	1.68774	1.15682	N12C(c3cc4OCOc4cc3CC1)Cc1ccc(c(c1C2)OC)OC
NPS	71795	0.882581	0.948201	n1ccc2c(c3[nH]c4c(c3c(c2c1)C)cccc4)C
NPS	118343	1.50194	0.792682	C(=C\c1oc(=O)c2C(=O)[C@H]([C@@H](Oc2c1)C)O)/C
NPS	176503	0.0154839	0.339587	O(C(=O)C=C(C)C)C1C2C(C(C(C3C1(C)C(=O)C=C3)C)O)OC(=O)C2C
NPS	284200	0.882581	0.940137	O(CC(CO)O)CCCCCCCCCCCCCCCCCC
NPS	332598	3.23613	0.872075	c1(nc(co1)/C=C(\C)/C=C/C=C(\C)/[C@@H](OC)[C@H](C)[C@H]1C[C@@H](O)[C@@]2([C@@H](O2)/C=C/[C@@H](C)[C@@H]2C[C@@H](CC(=O)O2)C[C@@H]2[C@H](O2)C(=O)O1)C)C
NPS	382796	1.37806	0.499672	c1ccc2c(c1)C1(OC(=O)C(C1)N1C(=O)c3c(C1=O)cccc3)C1N2C(=O)C(N1C(=O)OCc1ccccc1)(C)C
NPS	2150	1.00645	0.820234	c1(c(c(ccc1)OC)O)C=O
NPS	5897	0.263226	0.280053	c1cccc(c1)C1=C(/C(=C(/c2ccccc2)\C(=O)OC)/OC1=O)O
NPS	8661	1.31613	0.880794	O1c2cc(ccc2C2C(Cc3c2cc(c(c3)O)O)(C1)O)O
NPS	13123	1.44	1.03109	O=C1N=C(N(C1)C)N
NPS	19509	1.81161	0.945284	C1CN2CC3CCC(C(C3CC2c2c1c1ccccc1[nH]2)C(=O)OC)O.Cl
NPS	26254	1.13032	0.922676	C1(C(C(C(C(C1O)O)O)O)O)OC
NPS	34552	1.37806	1.01237	[N+]12([O-])C(CCCC1CO)CCCC2
NPS	43338	1.31613	0.814424	c1cc(ccc(c1=O)O)C(C)C
NPS	51351	0.75871	0.117347	c1(cc(cc(c1C(=O)/C=C/c1ccccc1)O)OC)OC	ANTAGONIST
NPS	72715	54.6116	0.792361	O1C=C(C2CC3N(CCc4c5c([nH]c34)cc(c(c5)OC)OC)CC2C1C)C(=O)OC.C(=O)(O)CC(O)(C(=O)O)CC(=O)O	UNKNOWN
NPS	85235	1.74968	0.638753	C1(=C)C2CCC(C3C(C2OC1=O)(C(=O)C=C3)C)C
NPS	2952	0.820645	0.917602	c1cc2c(cc1C(C)C)CC[C@@H]1[C@@]2(CCC[C@]1(C(=O)O)C)C
NPS	13252	1.13032	1.20712	Clc1c2[C@@]([C@H]3C[C@H]4[C@@H](C(=C(C(=O)[C@]4(C(=C3C(=O)c2c(cc1)O)O)O)C(=O)N)O)N(C)C)(C)O.Cl
NPS	31867	0.0774194	0.0961452	O1C(=O)c2c(cc(cc2Oc2c1cc(cc2CCCCC)O)O)C(=O)CCCC	ANTAGONIST
NPS	58368	0.820645	1.00205	N(C1CCCCC1)C1CCCCC1.CC1(C2C3(CO3)CCC(C2OC)OC(=O)/C=C/C=C/C=C/C=C/C(=O)O)C(O1)CC=C(C)C
NPS	89671	1.00645	0.806781	[C@H]1(/C=C/C(=O)O[C@H](CCC/C=C/[C@H]2[C@H]1C[C@H](C2)O)C)O
NPS	145118	0.510968	1.03241	CC12C(NC(=O)C(=O)C)/C=C(/C)\C=C/C(O)C/C=C(\C=C/C(CC(C(C1=O)C)OC2=O)O)/C
NPS	250429	1.00645	0.889875	C1CC2(C3C(C1)(C1(C(CC3O)C)OC3(CC1)CCOC3=O)COC2=O)C
NPS	305222	1.00645	0.909983	C1(=C)C(C2/C=C/CC(CC(/C=C/C(C32C(C1C)C(Cc1ccccc1)NC3=O)OC(=O)C)(O)C)C)O
NPS	350085	0.20129	0.717226	O1c2cc(ccc2[C@@H]2Oc3c([C@@H]2C1)ccc(c3)OC)O
NPS	661755	0.75871	0.744319	c12c(c(cc(c1[C@@H](N[C@H](C2)C)C)O)O)c1cc(c(c2c1cc(cc2OC)C)O)c1cc(c2cc(cc(c2c1O)OC)C)c1c2c([C@H](C)N[C@H](C2)C)c(cc1O)O.CC(=O)O
NPS	4143	1.74968	0.868941	Ic1cc(cc(I)c1O)CC(C(=O)O)N
NPS	7535	0.882581	1.00117	OC12C(C)(C(C(C2)O)C2=CC(=O)OC2)CCC2C1CCC1C2(C)CCC(C1)OC1CC(O)C(C(O1)C)OC1CC(O)C(C(O1)C)OC1CC(OC(=O)C)C(C(O1)C)OC1OC(CO)C(C(C1O)O)O
NPS	10105	0.882581	0.701257	N12C(c3cc(c(cc3CC1)OC)OC)Cc1cc(c(cc1C2)OC)OC
NPS	16631	1.62581	1.03364	c1(c(ccc(c1)C(=O)O)O)O
NPS	23615	1.19226	1.0515	O1C(n2ccc(=O)[nH]c2=O)CC(C1CO)O
NPS	32743	1.68774	1.12143	O=C1C(CC(CC1C)(OC(=O)C)C)C(O)CC1CC(=O)NC(=O)C1
NPS	36437	0.263226	0.361216	C1C(C2C(=C)C(=O)OC(C2)C(CC/C=C(\CC/C=C/1\C)/C)(O)C)OC(=O)C
NPS	46728	1.19226	0.452101	C1C(C2C(=C)C(=O)OC(C2)C(CC/C=C(\CC/C=C/1\C)/C)(O)C)OC(=O)C
NPS	63946	0.820645	0.417905	O=C1[C@@H]([C@H]([C@@]([C@H](OC(=O)[C@@H]([C@@H](OC2OC(C(C(C2)(OC)C)O)C)[C@@H]([C@@H](OC2OC(CC(C2OC(=O)CCC2CCCC2)N(C)C)C)[C@](C[C@H]1C)(C)O)C)C)CC)(O)C)O)C
NPS	79404	1.00645	0.818768	O=C1C(C(C2CC(=O)OC3C2(C1C1(C(C(C=C(C1C3)C)O)O)C)CO)C)O
NPS	7668	1.62581	1.04768	[C@@H]([C@@H](CCCCCCCC(=O)O)O)(CCCCCCO)O
NPS	26258	-0.0387097	0.125744	O1C[C@H]2Oc3c4C[C@@H](Oc4ccc3C(=O)[C@H]2c2c1cc(c(c2)OC)OC)C(=C)C
NPS	36398	0.572903	0.495488	c1(c(cc2c(c1)O[C@@H]([C@H](C2=O)O)c1ccc(c(c1)O)O)O)O
NPS	72116	0.820645	0.938643	[nH]1c2c(CCN3[C@@H]2C[C@H]2[C@H](C3)CC[C@@H]([C@@H]2C(=O)OC)O)c2ccccc12
NPS	122023	0.0774194	0.389972	C(C)(C)C1C(=O)NC(C(C)C)C(=O)OC(C)C(=O)NC(C(C)C)C(=O)OC(C(C)C)C(=O)NC(C(C)C)C(=O)OC(C(=O)NC(C(=O)OC(C(=O)NC(C(=O)OC(C(=O)NC(C(=O)O1)C(C)C)C)C(C)C)C(C)C)C(C)C)C
NPS	177406	0.325161	0.108983	O1C(C2OC(C(CC2)(O)CC)C)(CC(C1C(C(=O)C(C(C(CCc1ccc(c(c1C(=O)O)O)C)C)O)C)CC)C)CC
NPS	284437	0.572903	0.988388	O=C1C2C34C(C1)C(C(C4)(C)C)CCC3C(=O)OC2
NPS	332876	1.06839	0.574273	c1cocc1CC[C@]1([C@@H](C(=O)C[C@H]2C(CCC[C@]12C)(C)C)C)O
NPS	400978	1.13032	0.894017	O=C1C2=CC([C@@H](C2=C(C2([C@@]1(C)O)CC2)C)O)(C)C
NPS	2347	0.944516	0.884234	C(=O)(O)CC(C(=O)O)CC(=O)O
NPS	6435	200.129	0.801604	C1C[C@H]2C(=C[C@]1(C=C)C)CC[C@@H]1[C@@]2(CCC[C@]1(C(=O)O)C)C	UNKNOWN
NPS	8751	2.05935	0.958928	C(=C\C(=O)O)/C
NPS	14135	1.25419	1.12439	O1c2c(c(cc(c2C=CC1(C)C)OC)O)C(=O)C
NPS	19990	1.19226	0.989697	O=C1Nc2c(c(c3C4=C(OCOC4=C(C(=O)c3c2O)C)/C(=C/C(C(C(C(C(C(C(C(C(/C=C\C=C\1/C)C)O)C)O)C(=O)OC)O)C)O)(O)C)/C)OC(=O)C)C
NPS	26327	2.05935	1.08645	O=C1C2=C(CCC(O2)(C)C)C(=O)c2c1cccc2
NPS	34758	0.634839	0.777128	n1(c2c3OCOc3c(c(c2c(=O)c2c1cccc2)OC)OC)C
NPS	43339	1.68774	1.04398	O=c1c(cc(c(cc1)CC=C(C)C)C(C)C)O
NPS	56410	3.48387	0.761509	O=C1C2=C(N3C(C2COC(=O)N)(C2N(C2C3)C)OC)C(=O)C(=C1N)C
NPS	72861	1.37806	0.928911	[O-][N+]1(C2C[C@H](OC(=O)C(c3ccccc3)CO)CC1CC2)C
NPS	85998	1.06839	0.731157	C([C@H]([C@H]([C@@H]([C@@H](NC(=O)N(C)N=O)C=O)O)O)O)O
NPS	3053	1.37806	1.14849	c1cc(c2c(c1C)oc1c(c(=O)c(N)c(c1n2)C(=O)N[C@H]1[C@@H](OC(=O)[C@H](C(C)C)N(C(=O)CN(C(=O)[C@@H]2CCCN2C(=O)[C@@H](C(C)C)NC1=O)C)C)C)C)C(=O)N[C@H]1[C@@H](OC(=O)[C@H](C(C)C)N(C(=O)CN(C(=O)[C@@H]2CCCN2C(=O)[C@@H](C(C)C)NC1=O)C)C)C
NPS	14975	1.19226	1.32471	O1[C@]2([C@@H]([C@@H]([C@H]3[C@]4([C@H]2[C@]2([C@@H]([C@H](C=C([C@@H]2C[C@H]4OC(=O)[C@@H]3OC(=O)[C@](O)(C)CC)C)O)O)C)C1)C)O)O
NPS	32192	0.944516	1.17716	O1c2ccc3[C@@H](OC(=O)c3c2OC1)[C@H]1N(CCc2cc3OCOc3cc12)C
NPS	60387	1.37806	1.03801	N12[C@@H](Cc3c4cc(c(cc4c4c(c3C2)ccc(c4OC)OC)OC)OC)CCC1
NPS	94600	1.56387	0.913066	n1c2c3n(c(=O)c4COC(=O)[C@](c4c3)(O)CC)Cc2cc2ccccc12
NPS	150817	0.634839	0.929008	O1C(=O)CC(CC(CC(CCC(C(CC2OC(C(C(C2)O)C(=O)O)CC(OC2OC(C(C(C2O)N)O)C)/C=C/C=C/C=C/C=C/CC/C=C/C=C/C(C(C(C1C)C)O)C)O)O)O)O)O
NPS	250430	0.696774	0.760339	c12c(OC(C=C1)(C)C)cc1c(c2OC)[C@@H]2Oc3c([C@@H]2CO1)ccc(c3CC=C(C)C)O
NPS	307981	0.510968	0.536018	C1(C=Cc2c(O1)c(c1c(c2OC)c(c(c(=O)o1)c1ccc(cc1)O)O)CC=C(C)C)(C)C
NPS	361902	0.75871	0.79244	C1CC2(C(C1=O)(CC1C(=C)C(=O)OC1CC2C)C)O
NPS	719655	1.19226	0.696741	c12c(C[C@@H]3N([C@H]1C=C(C)C)C(=O)[C@H]1N(C3=O)CCC1)c1c(cc(cc1)OC)[nH]2
NPS	4586	1.44	0.88858	O=C1OC[C@@H]2[C@H]1Cc1cc(c(cc1[C@H]2c1ccc(c(c1)OC)O)O)OC
NPS	7606	1.13032	0.941854	C1(=O)NC(C(=O)N1)NC(=O)N
NPS	11866	0.820645	0.178574	c1cc(ccc1/C=C/C(=O)c1ccccc1)OC	ANTAGONIST
NPS	18334	1.06839	0.84693	O=C1C(OC(OC2C(OC(OC3C(OC(O[C@@H]4c5c(cc6C(=O)c7c(ccc(c7C(=O)c6c5O)O)O)[C@H]([C@@](C4)(O)CC)C(=O)OC)CC3N(C)C)C)CC2O)C)CC1)C
NPS	23878	1.62581	1.0057	O=C1OC(CC(=C1)OC)CCc1ccc2OCOc2c1
NPS	32944	1.87355	1.02612	N12CCc3cc(c(cc3[C@@H]1C[C@H](C[C@@H]1c3cc(c(cc3CCN1)O)OC)[C@H](C2)CC)OC)OC.Cl
NPS	36508	1.00645	0.933033	O=C1CC2OC(C3C2(CO1)C1CCC2(C4(C1(C(=O)C3)C)OC4C(=O)OC2c1ccoc1)C)(C)C
NPS	47147	0.634839	0.0797614	[nH]1c(c2[nH]c(c(c2)OC)/C=C\2/N=C(C(=C2)CCCCC)C)ccc1
NPS	67392	1.37806	0.901033	O=C1[C@@H](C)[C@H]2[C@](C1)(C2)C(C)C
NPS	81463	1.44	0.764816	[nH]1c2c(CCN3[C@@H]2C[C@H]2[C@@H](C3)C[C@H]([C@@H]([C@H]2C(=O)O)OC)O)c2ccc(cc12)OC
NPS	8519	0.882581	0.870447	o1c2c(c3occc3c(c2c(=O)cc1C)OC)OC
NPS	26271	1.25419	1.38636	O1CCCNP1(=O)N(CCCl)CCCl
NPS	42038	1.00645	0.968158	O1C(=O)[C@H]([C@H]2[C@H]1C1=C(/C(=N/O)/C=C[C@@]1(CC2)C)C)C
NPS	76022	1.37806	1.10219	o1c(=O)c2c(cc(c3oc(=O)c4c(c23)c1c(cc4)OC)OC)CCN(C)C.C(=O)(O)C
NPS	122224	0.944516	0.937463	O=C1NC(C(=O)OC(C(=O)NC(C(=O)N(C(C(=O)OCC(CC(=O)NC1C(C)C)C)CC(C)C)C)C(C)C)C(C)C)CC(C)C
NPS	177858	0.75871	1.08694	O=C1CCN2C(=O)C(N(C(=O)C3N(CCC3)C(=O)C(NC(=O)C(C(OC(=O)C(NC(=O)C2C1)c1ccccc1)C)NC(=O)c1ncccc1O)CC)C)Cc1ccccc1
NPS	285116	3.05032	1.43021	N1=C2SCC1C(=O)NC(C(C(C)O)(C)O)c1scc(n1)C(=O)NC1c3nc(cs3)C3N=C(CCC3(NC(=O)C(NC(=O)C(=C)NC(=O)C(=C)NC(=O)C(NC3C=Cc4c(cc(C(=O)OC1C)nc4C3O)C(C)O)C(C)C)C)c1scc(n1)C(=O)NC(C(=O)N/C/2=C\C)C(O)C)c1scc(n1)C(=O)NC(=C)C(=O)NC(=C)C(=O)N
NPS	333856	0.944516	0.644023	O=C1C23C(C(O)C=C(C3)C=O)/C=C(/C)\C(OC3CC([N+](=O)[O-])(C)C(C(O3)C)NC(=O)OC)C/C=C(\C3C(/C(=C\1/C(=O)O2)/O)(C)C1C(C(OC2CC(OC4OC(C)C(CC4)OC4CC(O)C(C(O4)C)OC4OC(C)C(CC4)O)C(C(O2)C)OC(=O)C)C(CC1C)C)C=C3)/C
NPS	401005	0.0154839	0.0103947	C1=CC(=O)C2=C(C1=O)C1C3C4C2OC(=O)C4CC2CCC(C32)C(CO1)C
NPS	2802	1.19226	0.89164	C1(C(C(C1)C(=O)O)(C)C)CC(=O)O
NPS	6832	1.44	0.970994	O=C1C2CC(C2(C)C)C(=C1)C
NPS	8797	1.13032	0.882594	[C@@H]([C@@H]1[C@]2([C@H](C[C@H]3[C@H]([C@@H]2CC1)CC[C@H]1[C@@]3(CC[C@H](C1)O)C)O)C)(C)CCC(=O)O
NPS	14664	1.62581	1.1101	c1(c2c(nc(n1)O)nc[nH]2)O
NPS	20103	1.37806	0.995898	c1c(c(c(cc1C(=O)O)O)O)O
NPS	27425	3.73161	1.09512	NC(=O)NCCCC(C(=O)O)N
NPS	35550	1.44	0.736599	N1=C(c2cc(c(cc2CC1)OC)OC)Cc1cc(c(cc1)OC)OC.C(=O)(O)C(=O)O
NPS	43871	1.13032	0.799234	N1(C2C[C@H](CC1CC2)O)C
NPS	59258	1.56387	1.08629	C1[C@H]([C@@H]([C@@H](C[C@@]1(O)C(=O)O)O)O)O
NPS	72862	1.81161	0.943115	O=C1N2[C@@H]3[C@]4(CCN5CC6=CCO[C@H]([C@@H]3[C@H]6C[C@@H]45)C1)c1cc(ccc21)OC
NPS	86005	2.3071	0.491184	c12cc(c3c(c1OC1C(C(C(C2(O1)C)O)N(C)C)O)C(=O)c1c(C3=O)c(c2c(c1)C(C(CC2O)(C)O)C(=O)OC)O)O
NPS	5113	0.944516	0.943887	O1c2c(c3occ(c4ccc(c(c4)O)O)c(=O)c3c(c2CC=C(C)C)O)C=CC1(C)C
NPS	15780	1.50194	1.33756	O1C(C(C(C(C1OCC1OC(O[C@H](c2ccccc2)C#N)C(C(C1O)O)O)O)O)O)CO
NPS	32979	1.13032	0.856371	c1(cc2CCN(C3c2c(c1OC)c1c(c(ccc1C3)OC)O)C)OC
NPS	62709	1.06839	0.978374	n1c(c(c(c(c1C(=O)O)C)c1ccc(c(c1O)OC)OC)N)c1nc2c3=NC(N=c3c(c(c2cc1)O)OC)(C)C
NPS	96911	1.50194	1.04905	n1c2cc(c(cc2nc2c1[nH]c(=O)[nH]c2=O)C)C
NPS	153858	4.10323	1.10085	O=C1O[C@H]2C[C@@](N1)([C@@H](/C=C/C=C(/Cc1cc(c(Cl)c(N(C(=O)C[C@H](OC(=O)[C@@H](N(C(=O)C)C)C)[C@@]3(O[C@H]3[C@@H]2C)C)C)c1)OC)\C)OC)O
NPS	255109	0.449032	0.622856	O=C1C2=C(N)C(=O)C=C1NC(=O)/C(=C/C=C\C(OC)C(/C(=C/C(C(C(CC(C2)C)OC)O)C)/C)OC(=O)N)/C
NPS	325014	0.820645	0.878305	[C@@H]1([C@@H](CC(=C2C(=O)O[C@@]([C@@H]([C@H]12)NC(=O)[C@@H](N)C)(C(Cl)Cl)C)O)O)O
NPS	369397	1.13032	0.853669	CC1C2C34C(OC1=O)OC(OO4)(CCC3C(CC2)C)C
NPS	824	1.44	0.81829	[C@]1(C([C@@H](CC1)C(=O)O)(C)C)(C)C(=O)O
NPS	5036	1.06839	0.917207	c1(=O)c2c(n(c(=O)n1C)C)ncn2C
NPS	7616	1.13032	0.986473	C(/C(=C/C(=O)O)/C(=O)O)C(=O)O
NPS	11905	1.56387	0.909318	O=C1C(=C(C(=O)c2c1cccc2)O)CC=C(C)C
NPS	18805	0.944516	0.955613	c1cc(ccc(c1=O)O)C(C)C
NPS	24819	2.3071	0.937748	O1c2c(OC1)c(c1C[C@H]3COC(=O)[C@@H]3[C@@H](c1c2)c1cc(c(c(c1)OC)OC)OC)O
NPS	32984	1.00645	1.02922	O=C1Cc2ccc3OCOc3c2CN(CCc2c1cc(c(c2)OC)OC)C
NPS	36693	0.572903	0.879333	C1[C@H]([C@@]([C@]2(CCC[C@@]3(C)[C@@H]2[C@@H]1OC3=O)C)(CCc1ccoc1)O)C
NPS	50131	1.37806	1.02571	C1(C(C(C(c2c1cc(c(c2)OC)OC)c1cc(c(c(c1)OC)OC)OC)C(=O)O)(CO)O)O
NPS	69187	1.50194	0.943375	n1ccc2c(c3[nH]c4c(c3c(c2c1)C)cc(cc4)OC)C
NPS	83433	1.25419	0.585304	O=c1oc2c(c3OC4(C(C5c3c(OC(C5CC4)(C)C)c2)O)C)cc1
NPS	9665	1.62581	1.11876	O1[C@]2([C@@H]([C@]3(O[C@@H]3CC=C(C)C)C)[C@@H]([C@@H](CC2)O)OC)C1
NPS	26326	1.00645	1.23446	C1(=O)C(=O)C2=C(c3c1cccc3)OC(CC2)(C)C
NPS	45383	0.263226	0.350489	n1c(c(c(c(c1C(=O)O)C)c1ccc(c(c1O)OC)OC)N)c1nc2C(=O)C(=C(C(=O)c2cc1)OC)N
NPS	82151	1.00645	0.954281	O=C1c2c(c(c3C[C@](C[C@H](OC4OC(C(C(C4)N)O)C)c3c2O)(C(=O)C)O)O)C(=O)c2cccc(c12)OC.Cl
NPS	122750	1.25419	0.559653	O=C1C2=CC(=O)C(=C1C[C@H](C[C@H]([C@H]([C@@H](/C=C(/[C@H]([C@@H](/C=C\C=C(\C(=O)N2)/C)OC)OC(=O)N)\C)C)O)OC)C)OC
NPS	180515	0.696774	0.489078	O=C1CCCC(OC(=O)/C=C/1)C(=O)C
NPS	287088	1.81161	0.908639	CC12C34C5C6(CC1OC(=O)C6COC(O3)(C5=O)C1C(CCC4(C(=O)O2)O)C2(C)C(=CC1)CC=CC2=O)C
NPS	337783	0.510968	0.636269	[C@@]1([C@H]2[C@@](C3=CC(=O)[C@]4(O[C@H]4[C@@]3(CC2)O)C(C)C)(CCC1)C)(C)C(=O)OC
NPS	407286	1.37806	0.857975	c1(=O)c2cc(c(c3c2c2c(c(c(cc2c(=O)o3)O)O)o1)O)O
NPS	2835	1.00645	0.808836	C(=C\C[C@H](O)CCCCCC)\CCCCCCCC(=O)O.[Na+]
NPS	7521	2.18323	0.981856	O1C(O[C@H]2CC[C@@]3([C@H]4CC[C@@]5([C@@H](c6ccc(=O)oc6)CC[C@@]5([C@@H]4CCC3=C2)O)C)C)C(C(C(C1C)O)O)O
NPS	8973	1.56387	0.965269	[C@]1(C[C@H](CC1)C(C)C)(C(=O)O)C
NPS	14665	0.882581	1.05915	n1c(=O)c2[nH]cnc2[nH]c1
NPS	20264	6.89032	1.20368	O1C(C(C(C1n1cnc2c1ncnc2N)O)O)COP(=O)(O)O	UNKNOWN
NPS	28841	1.87355	1.1483	n1c(nc(nc1O)C(=O)O)O.[K+]
NPS	35676	1.06839	1.18712	O=c1c2c(c(c(cc2cccc1O)O)O)O
NPS	44138	1.31613	1.08028	O1C(C(C(C(C1OP(=O)(O)O)O)O)O)CO
NPS	59263	4.59871	1.69939	c1(c(c(cc(c1)C(=O)Oc1cc(cc(c1O)O)C(=O)O)O)O)O
NPS	72917	1.44	0.886913	O=C1N2C3C4C5C(CCOC4C1)CN1C(C5)C3(CC1)c1c2cc(c(c1)OC)OC
NPS	88466	1.25419	0.680056	O=C1C(=C(C2=C(C(=O)C(=C(C2=O)O)C)O)C(=O)C(=C1C)O)O
NPS	5159	2.36903	1.29677	Cc1ccc2c3c1c(=O)oc1c4c(cccc4OC4C(C(C(C(C)O4)O)O)OC4C(C(C(C(C)O4)O)OC)O)c(c(c31)c(=O)o2)O
NPS	22070	0.634839	0.544656	CC12C(O1)CC/C(=C/C(C1C(C2)OC(=O)C1=C)OC(=O)C)/C
NPS	32982	0.944516	0.635445	c1(c(ccc(c1)/C=C/C(=O)CC(=O)/C=C/c1ccc(c(c1)OC)O)O)OC
NPS	63701	4.53677	1.08537	n1c(c2c(cn(c2nc1)C1OC(C(C1O)O)CO)C#N)N
NPS	105388	1.68774	1.0561	C\1(=C/C=C/C=C/C=C/C=C/C(C(OC(=O)C(C(CC(CC(CC(CC(CC(C(C1O)O)O)O)O)O)O)O)C(O)CCCCC)C)O)/C
NPS	157035	0.882581	0.823826	[C@H]12[C@@H](CC/C(=C\CC[C@@]3([C@@H]1O3)C)/C)C(=C)C(=O)O2
NPS	263164	1.06839	1.08953	n1c(c2ncn([C@@H]([C@@H](O)C)CCCCCC)c2nc1)N.Cl
NPS	325319	1.25419	0.938829	C1(=O)C[C@H]([C@@H](NC(=O)C(C(OC(=O)C(N(C(=O)C2N(C(=O)C(NC(=O)C(C(=O)C(O1)C(C)C)C)CC(C)C)CCC2)C)Cc1ccc(cc1)OC)C)NC(=O)C(N(C)C(=O)C1CCCN1C(=O)C(O)C)CC(C)C)[C@H](C)CC)O
NPS	375294	1.06839	0.907023	CC12C3=C(CCC1C(C)(C)CCC2)C(=O)OC3
NPS	1115	1.25419	0.963724	C1[C@H]([C@H]([C@@H](C[C@]1(O)C(=O)O)O)O)O
NPS	5379	1.87355	1.02548	CCCCCCCCCCCCCCCCCCO
NPS	7652	49.711	1.23233	c1(c2c(ncn1)n(cn2)C1C(C(C(O1)CO)O)O)N	UNKNOWN
NPS	12444	1.50194	1.0891	O1C2C3CC(C(C3C1=O)C(=O)O)C2
NPS	19028	1.37806	1.03413	o1c(c2ccccc2)cc(=O)c2c1cccc2
NPS	24872	1.74968	1.06903	O=C1C(=C(C(=O)c2c1cccc2)O)C/C=C(/C)\CO
NPS	33410	1.13032	1.17952	O=c1c(ccc2c3c(c(c(cc3CC[C@@H](c2c1)NC(=O)c1ccccc1)OC)OC)OC)OC
NPS	38010	1.31613	1.15981	C1CC=CC1CCCCCCCCCCCCC(=O)OCC
NPS	50132	1.50194	0.947353	O1CC2(Cc3cc(c(cc3C(C2(C1=O)O)c1cc(c(c(c1)OC)OC)OC)OC)OC)O
NPS	70931	-0.0387097	0.00966913	O=C1C=C2[C@@]3(CC[C@]4([C@@H]5C[C@](CC[C@@]5(CC[C@@]4(C3=CC=C2C(=C1O)C)C)C)(C)C(=O)O)C)C
NPS	83436	1.06839	0.553355	O1c2c(c3OC(C=Cc3c(c2CCC(=O)O)OC)(C)C)C=CC1(C)C
NPS	11440	2.61677	1.30226	O1c2c(OC1)cc1C(=O)Cc3ccc4OCOc4c3CN(CCc1c2)C.Cl
NPS	29854	1.00645	1.14714	N12C(c3[nH]c4cc(ccc4c3CC1)OC)CC1C(C(C(CC1C2)OC(=O)CCc1cc(c(c(c1)OC)OC)OC)OC)C(=O)OC
NPS	45923	1.62581	1.36646	c1cc(=O)oc2c1cc1ccoc1c2OC
NPS	85236	0.75871	0.177645	O=C1C=C[C@H]2[C@@H](C[C@H]3OC(=O)C(=C)[C@H]3[C@@H]([C@]12C)O)C
NPS	122819	0.820645	0.971744	s1c([C@@H]2OCC3OC(O[C@H]4[C@@H]5[C@@H]([C@H](c6cc(c(c(c6)OC)O)OC)c6cc7OCOc7cc46)C(=O)OC5)C(C(C3O2)O)O)ccc1
NPS	209870	0.944516	1.18498	O=C1C(C(C(C(OC(=O)C(C(OC2OC(C(C(C2)(O)C)O)C)C(C(C(CC1C)(O)C)O)C)C)CC)C)O)C
NPS	292567	0.263226	0.31008	CC1C2(OC(C1)(C)C1OC(CC1)(C)C1OC(CC1C)C1OC(CO)(O)C(CC1C)C)OC(CC1OC(C(C(=O)O)C)C(CC1)C)CC(C2C)OC
NPS	339555	2.12129	0.260222	OC12C(OC(=O)/C=C/C=C/CCC)/C(=C/C(=O)OC)/CC(O1)CC(C(C)O)OC(=O)CC(O)CC1OC(CC3OC(/C=C/C2(C)C)C/C(=C\C(=O)OC)/C3)(O)C(C)(C)C(C1)OC(=O)C	ANTAGONIST
NPS	407306	1.00645	0.884986	N12C(c3[nH]c4ccccc4c3CC1)CC1C(C(CCC1C2)O)C(=O)OC
NPS	3071	1.13032	0.965359	C1(=CC(=O)C(=CC1=O)C)OC
NPS	7525	1.00645	1.03054	O1C(C(C(C(C1OC1C(C(OC(C1O)C)O[C@H]1CC[C@@]2([C@H]3CC[C@@]4([C@@H](c5ccc(=O)oc5)CC[C@@]4([C@@H]3CCC2=C1)O)C)C)O)O)O)O)CO
NPS	9170	1.13032	1.02639	O=c1c(ccc2c3c(c(c(cc3CC[C@@H](c2c1)N)OC)OC)OC)SC
NPS	14974	1.62581	1.09513	O1C2(C(C(C3C(C(=O)OC4C3(C2C2(C(C(C=C(C2C4)C)O)O)C)C1)O)C)O)O
NPS	21725	0.882581	0.960626	N12[C@H]([C@H]3Cn4c(=O)cccc4[C@@H](C2)C3)CCCC1
NPS	30238	1.62581	1.16238	C(=O)(/C(=C(\C(=O)O)/O)/O)O
NPS	36294	0.820645	1.03194	O1C(C=Cc2c1cc(c(c2OC)C(=O)C)O)(C)C
NPS	44175	0.944516	0.738926	O=C1C(=C(C(=O)C(=C1c1ccccc1)O)c1ccccc1)O
NPS	59729	1.50194	1.00626	c1(=O)[nH]c(c(c(=O)[nH]1)/C=C/C(=O)N[C@@H](CO)CS(=O)CSC)C
NPS	72942	1.50194	0.91777	N1=C(CCC1C(=O)NCCC(=N)N)N.S(=O)(=O)(O)O
NPS	89937	1.74968	0.673559	O(C(=O)C(C(C)C)(O)C(C)O)CC1=CCN2C1C(CC2)O
NPS	5366	1.87355	1.36143	N1(CCc2cc3OCOc3c(c2[C@@H]1[C@H]1OC(=O)c2c1ccc(c2OC)OC)OC)C
NPS	22842	1.31613	1.16111	c1(ccc2c(c1)oc(=O)c1c2oc2c1ccc(c2)O)O
NPS	35611	1.50194	1.28645	O1C(C(C(OC2OC(C(C(C2O)O)O)CO)C(OC2OC(C(C(C2O)O)O)C)C1OC1CC2=CCC3C4CC5N6CC(CCC6C(C5C4(CCC3C2(CC1)C)C)C)C)O)CO.Cl
NPS	67574	1.44	1.13838	N1([C@@H]2[C@@]3([C@H]4N(CC=C[C@]4([C@H]([C@]2(O)C(=O)OC)OC(=O)C)CC)CC3)c2cc([C@]3(C[C@H]4C[C@](CN(CCc5c3[nH]c3c5cccc3)C4)(CC)O)C(=O)OC)c(cc12)OC)C=O.S(=O)(=O)(O)O
NPS	114344	0.0154839	0.243615	O=c1c(c(c2coc([C@@H](C)CC)c(c2c1)C)O)C(=O)O
NPS	169627	0.696774	0.892608	O1COC(=C2C1=C(C(=O)c1c2c(OC(=O)C)c(c(c1O)NC(=O)/C(=C/C=C\C(C(O)C(C1C(C(C(C(O1)O)C)O)C(=O)OC)C)C)/C)C)C)/C(=C/C(=O)C)/C
NPS	270914	0.634839	0.432511	O=C1C[C@@H]2[C@@]3([C@@H]([C@]4([C@H](C4)C)C(=O)C4=C3[C@@]2([C@@H]([C@@H]([C@H]4O)OC(=O)C)C1(C)C)C)OC(=O)C)O
NPS	330753	0.882581	0.917417	[C@]12(C(C(=C([C@H](C1)O)C)[C@H](C(=O)[C@]1([C@H]([C@@H]2OC(=O)c2ccccc2)[C@]2([C@H](OC2)C[C@@H]1O)OC(=O)C)C)OC(=O)C)(C)C)O
NPS	376248	0.387097	0.810989	O(c1c2CCC(Oc2c2c(c1)oc1c3c2cc(oc3cc(=O)c1)c1ccccc1)c1ccccc1)C
NPS	2080	0.944516	0.929284	O1C(C(C(C1(OC1OC(C(C(C1O)O)O)CO)CO)OC1C(C(C(C(O1)CO)O)O)O)O)CO
NPS	5863	0.75871	0.966739	c1(=O)c2ccccc2[nH]cn1
NPS	8625	1.31613	1.00981	O=C1C(=CC(=O)c2c1cccc2)O
NPS	12865	0.696774	0.351905	c1cc(cc2c1nccc2C(C1N2CC(C(C1)CC2)C=C)O)OC.Br
NPS	19038	1.37806	0.715447	c1(c(c(c(c(c1)OC)OC)O)C(=O)/C=C/c1ccc(cc1)OC)OC
NPS	24951	1.87355	1.01671	O=C1N2[C@@H]3[C@]4(CC[N+]5([O-])CC6=CCO[C@H]([C@@H]3[C@H]6C[C@@H]45)C1)c1ccccc21
NPS	34202	1.25419	1.06725	O=C1C[C@@]2([C@@H]([C@H](C)CCC(=O)OC)CC[C@]2([C@H]2[C@H]1[C@]1(CC[C@@H](C([C@@H]1CC2=O)(C)C)OC(=O)C)C)C)C
NPS	38270	1.50194	0.892027	CC1C(C(CC(O1)OC1C(Cc2cc3cc(cc(c3c(c2C1=O)O)O)OC1CC(C(C(C)O1)OC1CC(C(C(C)O1)OC)O)OC(=O)C)C(C(=O)C(C(C)O)O)OC)OC1CC(C(C(C)O1)O)OC1CC(C)(C(C(C)O1)OC(=O)C(C)C)O)O
NPS	50393	1.37806	0.804354	O1C(c2ccccc2)CC(=O)c2c1cccc2
NPS	72138	0.572903	0.718918	[nH]1c2c(CCN3[C@@H]2C[C@H]2[C@@H](C3)C[C@@H](OC(=O)c3cc(c(c(c3)OC)OC)OC)[C@@H]([C@H]2C(=O)OC)OC)c2ccccc12
NPS	83439	1.37806	0.532394	O=C1CC[C@@]2([C@H]3CC[C@H]4[C@H](C[C@]3(CC[C@H]2[C@]1(CO)C)C4)C(=O)O)C
NPS	11926	1.50194	1.27934	O1COc2c1c1c(c(c2)C(=O)O)c(cc2c1cccc2OC)[N+](=O)[O-]
NPS	30552	4.04129	1.16848	o1c2c(c(c(c(c2)O)OC)CC=C(C)C)c(=O)c2c(c(c(cc12)O)CC=C(C)C)O
NPS	51001	1.13032	1.18265	O=C1[C@@H](C[C@@H]([C@H](OC2OC(C(OC3OC(C(C(C3)(C)O)OC(=O)CC(C)C)C)C(C2O)N(C)C)C)[C@H]([C@@H](CC(=O)O[C@@H](C[C@@H]2OC2/C=C/1)C)OC(=O)C)OC)CC=O)C
NPS	85239	1.87355	1.13	C1(=C)C2CCC(C3(C(C2OC1=O)(C(=O)C=C3)C)O)C
NPS	129536	0.696774	1.11129	O1C(=O)C23C4(C1C1OC(=O)C(C1C(C)(C)O)C4(CC3O2)O)C
NPS	210236	0.696774	0.526299	O=C1OC2CC(C1=C)C(C/C(=C\CC/C(=C/C(CC2C)O)/C)/C)O
NPS	301683	0.75871	1.08473	c1(c2c(ccc(=O)o2)ccc1OC(=O)C)OC(=O)C
NPS	345647	1.99742	0.348888	c1c(c(c2c(cc(c3c2cc2c(c3O)C(=O)C(C(O2)C)C)O)O)c2c(c1O)c(c1c(c2)OC(C(C1=O)C)C)O)O
NPS	614552	1.06839	1.02014	C1([C@H](C([C@@H]2N(C1)CC[C@@H]2O)O)O)O
NPS	3590	0.820645	0.98063	n1c(c2N(C(CNc2nc1N)CNc1ccc(cc1)C(=O)N[C@@H](CCC(=O)O)C(=O)O)C=O)O.[Ca+2]
NPS	7532	1.06839	1.07061	OC12C3C(C4(C)C(CC3)CC(CC4)OC3CC(O)C(C(O3)C)OC3CC(O)C(C(O3)C)OC3CC(OC(=O)C)C(C(O3)C)OC3OC(CO)C(C(C3O)O)O)CCC1(C)C(CC2)C1=CC(=O)OC1
NPS	9248	1.56387	1.05501	O1C(C(C(C(C1O)O)O)O)C(=O)O
NPS	15307	1.50194	1.06124	n1c2ccc(cc2c(cc1)C(=O)C1N2CC(C(C1)CC2)C=C)OC
NPS	21728	1.31613	0.898657	n12c(c3nc4ccccc4c3cc1)cc1CCCCc1c2.[N+](=O)(O)[O-]
NPS	30625	1.25419	1.05381	[C@@H]([C@](O)(C(=O)OCC1=CCN2[C@H]1[C@@H](OC(=O)/C(=C\C)/C)CC2)C(O)(C)C)(C)OC
NPS	36354	1.37806	0.894103	O=c1cc2[C@H](CCc3cc(c(c(c3c2ccc1OC)OC)OC)OC)N.[C@@H]([C@@H](O)C(=O)O)(C(=O)O)O
NPS	45384	1.62581	0.914937	n1c(c(c(c(c1C(=O)OC)C)c1ccc(c(c1O)OC)OC)N)c1nc2C(=O)C(=C(C(=O)c2cc1)OC)N
NPS	61809	1.06839	1.03803	C[N+]1(C)C2C3C(C1CC(C2)OC(=O)C(CO)c1ccccc1)O3
NPS	75527	1.06839	0.683171	c1(cc(cc(c1C(=O)/C=C/c1cc(c(cc1)OC)OC)OC)OC)OC
NPS	90636	1.87355	0.615022	[nH]1c2[C@](C[C@@H]3[C@H]4O[C@]4(CN(CCc2c2ccccc12)C3)CC)(c1cc2[C@]34[C@H]5N(CC=C[C@]5([C@H]([C@]([C@@H]3N(c2cc1OC)C)(O)C(=O)OC)OC(=O)C)CC)CC4)C(=O)OC.S(=O)(=O)(O)O
NPS	93047	1.25419	0.625626	O=C1NC(=O)C(=C1)C1OC(C(C1O)O)CO
NPS	100290	2.43097	0.855417	c1ccc(O)c2c1C(=O)c1c(C2=O)c(O)c2c(c1)[C@@H]([C@@](CC2OC1OC(C(C(C1)N(C)C)O)C)(CC)O)C(=O)OC.Cl
NPS	111041	1.99742	0.324456	O=C1c2[nH]c(=O)ccc2C(=N)C=C1N
NPS	123977	1.93548	1.1326	C1(C(OC(C(C1OC)O)OC1CCC2(C(CCC3C2C(CC2(C3(CCC2C2=CC(=O)OC2)O)C)O)C1)C)C)O
NPS	143648	0.417293	0.786894	n1c(c2c(cn(c2nc1)C1OC(C(C1O)O)CO)C(=O)N)N.Cl
NPS	172924	0.68797	0.818728	O=C1CC2(C3C(C(C4(OCC53C4C(C(=O)OC5CC2C(=C1O)C)OC(=O)C=C(C)C)C(=O)OC)O)O)C
NPS	237671	0.597744	0.565199	Cc1ccc(c2c1oc1c(C)c(=O)c(c(c1n2)C(=O)NC1C(CO)OC(=O)C(C)N(C)C(=O)CN(C)C(=O)C2/C(=N/OC)/CC(C)N2C(=O)C(C(C)C)NC1=O)N)C(=O)NC1C(C)OC(=O)C(C(C)C)N(C)C(=O)CN(C)C(=O)C2C(CC(C)N2C(=O)C(C(C)C)NC1=O)O
NPS	266535	1.40977	1.05415	O=C1c2c(C3=C[C@@H]([C@H]([C@H]([C@@H]3N1)O)O)O)cc1c(c2O)OCO1
NPS	291312	0.68797	0.489896	CC12C3(C4CC2OC(=O)/C=C/C=C/C(=O)OCCC(C(C(=O)OCC21C(O4)C=C(C(C2)O)C)O)C)CO3
NPS	330917	0.958647	1.22239	n1cnc2c(c1N)ncn2C1OCC(C1O)O
NPS	403148	1.68045	0.349579	O1c2c(OC1)cc1C[C@H]3COC(=O)[C@@H]3[C@@H](c1c2)c1cc(c(c(c1)OC)OC)OC
NPS	526417	0.868421	1.08574	CC1C(=O)N(C)C2CSC(C(C(=O)N(C)C(C(=O)OCC(C(=O)N1)NC(=O)c1cnc3ccccc3n1)C(C)C)N(C)C(=O)C(C)NC(=O)C(COC(=O)C(C(C)C)N(C)C2=O)NC(=O)c1cnc2ccccc2n1)SC
NPS	785154	0.958647	0.255316	O(C)c1c2c3c(cc4c2cccc4)N(C)CCc3cc1OC	ANTAGONIST
NPS	785166	1.31955	1.14194	c1(c2C3(C[C@H]4c2c(cc1OC)CCN4C)C=CC(=O)C=C3)O
NPS	785178	0.68797	0.392321	c1c2CCN([C@@H]3c2c(c2c(C3)cc(c(c2)OC)O)c2c1OCO2)C
NPS	99791	1.31613	0.788753	O=C1N2C3C4(C5N(CC4)C/C(=C\CO)/C(C5)C3=CC1)c1ccccc21
NPS	106486	2.55484	1.17149	n1c(=O)c2[nH]nc(c2[nH]c1)C1OC(C(C1O)O)CO
NPS	121849	1.31613	1.04518	O=C1N2C3C4C5C(=CCOC4C1)C[N+]1(C([O-])(C5)C3(CC1)c1c2cc(c(c1)OC)OC)C
NPS	136035	1.93548	0.933945	NCCOCC(N)C(=O)O.Cl
NPS	156219	0.417293	0.852071	O=C1Nc2c(c(c3C4=C(OCOC4=C(C(=O)c3c2O)C)/C(=C/C(C(C(C(C(C(C(C(C(/C=C\C=C\1/C)(C)O)O)C)O)C(=O)OC)O)C)O)(O)C)/C)OC(=O)C)C
NPS	186301	0.868421	0.938698	O=c1c(ccc2c3c(c(c(cc3CC[C@@H](c2c1)NC(=O)C)OC)OC)OC)SC
NPS	255112	0.597744	0.436219	O(C1=C2CC(CC(OC)C(C(/C=C(/C(C(OC)/C=C\C=C(\C(=O)NC(=C(C1=O)/C=N/N1CCOCC1)C2=O)/C)OC(=O)N)\C)C)O)C)C
NPS	269756	0.778195	0.985096	C1(=C[C@@H]2[C@]3(C[C@H]1O)[C@@]1(C4([C@H](O2)C[C@H]1OC(=O)/C=C\C=C\[C@@H](OC[C@@H]([C@]1(O[C@@H]1C(=O)OC3)C)O)[C@@H](C)O)OC4)C)C
NPS	314018	1.04887	1.05356	CC1C2CC(C(/C=C/C=C(\C)/Cc3cc(c(c(c3)O)Cl)N(C)C(=O)CC(C3(C)C1O3)OC(=O)C(C)C)OC)(NC(=O)O2)O
NPS	354844	0.868421	1.02912	c1c(cc2c(c1OC)c1c(oc2=O)c2c(c(c1)OC)c(ccc2C1OC(C(C(C1O)(O)C)O)C)O)C=C
NPS	616348	1.04887	1.03262	Cl.c12c(c(c3c(n1)ccc(c3)OC(=O)N1CCC(CC1)N1CCCCC1)CC)Cn1c2cc2c(c1=O)COC(=O)[C@@]2(CC)O
NPS	785148	0.958647	0.858866	c1(ccc2c(c1OC)c1c3[C@H](C2)NCCc3cc2c1OCO2)O.Cl
NPS	785160	1.1391	0.835395	O(C)c1c2c3c4[C@H](Cc2ccc1O)NCCc4cc1c3OCO1
NPS	785172	0.958647	0.872678	C([C@@H]1c2c(cc(c(c2)OC)OC)CCN1C)c1ccc(cc1)O.C(=O)(C(=O)O)O
NPS	785184	1.04887	0.87171	c1(ccc(c(c1)Oc1ccc(cc1)C[C@@H]1c2c(CCN1C)cc(c(c2)O)OC)O)C[C@H]1c2c(CCN1C)cc(c(c2)O)OC
NPS	93373	1.19226	0.756304	O1C(=O)CC(=C1)[C@@H]1[C@]2(CC[C@H]3[C@H]([C@]2(CC1)O)CC[C@]1([C@@]3(CC[C@@H](C1)O)/C=N/O)O)C
NPS	100858	1.25419	1.17589	O(C1C(C(C(C(C1O)O)O)O)O)C1OC(C(CC1N)NC(=N)C(=O)O)C
NPS	112906	1.13032	1.08884	C1CCC2C(=C1O)C(=O)OC(C2)C
NPS	127445	2.24516	0.806137	C(c1cnc(c(=O)n1O)CC(C)C)(CC)(C)O
NPS	145150	0.868421	0.799441	O=C1OCC2C3(C=C(C(C3C=C2C(=O)O)C)C)C1=C
NPS	172946	0.597744	0.895606	O=c1c(ccc2c3c(c(c(cc3CC[C@@H](c2c1)NC(=O)C)O)OC)OC)OC
NPS	244387	0.958647	0.695522	O=C1CCC(O1)(C(CCCCCCCCCC)C(=O)O)C(=O)O
NPS	267033	1.04887	1.04038	C1C(=CC2C(C1)(C)[C@]1([C@]3([C@@H](O2)C[C@@H]1OC(=O)C)CO3)C)C
NPS	292222	2.58271	0.837032	CC1C2CC(C(/C=C/C=C(\C)/Cc3cc(c(c(c3)OC)Cl)N(C)C(=O)CC(C3(C)C1O3)OC(=O)C(C)C)OC)(NC(=O)O2)O
NPS	332294	1.31955	0.514671	n1(c2cccc3[C@H]4C[C@H](CN([C@@H]4Cc(c23)c1)C)C)CCC.[C@@H]([C@@H](O)C(=O)O)(C(=O)O)O
NPS	403169	0.507519	0.269797	n1(c2c3C=CC(Oc3cc(c2c(=O)c2c1cccc2)OC)(C)C)C	UNKNOWN
NPS	785143	1.5	0.795016	c1c(cc2c(c1)c1c3c(C2=O)nccc3c(c(c1OC)OC)OC)O
NPS	785155	1.04887	0.744082	CN1c2c3c(c4c(c2)c(OC)c(c(c4)OC)OC)c2c(cc3CC1)OCO2
NPS	785167	1.04887	0.211145	c1(c2c3[C@@H](Cc4c2cc(cc4)O)N(C)CCc3cc1OC)O	ANTAGONIST
NPS	785179	0.958647	0.0272757	c1(c2CCN([C@@H]3c2c(c2c(C3)cc(c(c2)OC)O)c2c1OCO2)C)OC	ANTAGONIST
NPS	99792	1.13032	0.705683	O=C1N2C3C4C5C(=CCOC4C1)CN1C(C5)(C3(CC1)c1c2cccc1)O
NPS	106969	2.4929	0.926815	o1c(c2cc(c(cc2)OC)O)c(c(=O)c2c1cc(c(c2O)OC)O)OC
NPS	121859	7.2	1.47625	N1(CCc2cc3OCOc3cc2C1)C.Br	UNKNOWN
NPS	136044	1.00645	0.635986	O=C1c2c(c3[C@@H](OC4OC(C(C(C4)N(C)C)O)C)[C@@](C[C@H](OC4OC(C(C(C4)N(C)C)O)C)c3c(c2C(=O)c2c1cccc2O)O)(O)CC)O
NPS	156236	0.868421	0.924366	C1=C(C2C(=C(CCC3C2OC(=O)C3C)C)C1=O)C
NPS	208734	0.417293	0.975376	O=C1CCC(OC1C)OC1C(CC(OC1C)OC1C(CC(OC1C)O[C@H]1C[C@]([C@@H](c2cc3C(=O)c4cccc(c4C(=O)c3c(c12)O)O)C(=O)OC)(O)CC)N(C)C)O
NPS	259968	1.5	0.77147	CC1C(=O)NC(C)C(=O)N(C)C(Cc2ccc(cc2)OC)C(=O)NC(C)C(=O)N(C)C2C(c3ccc(cc3)Oc3cc(ccc3O)CC(C(=O)N1)N(C)C2=O)O
NPS	269760	1.04887	0.955414	O=C1OCC23[C@@H]([C@H]4[C@](O4)(CC3)C)O[C@@H]3C[C@@H](OC(=O)/C=C\C=C\[C@@H](OC[C@@H]([C@]4(O[C@H]14)C)O)[C@@H](O)C)[C@]2([C@]13OC1)C
NPS	316458	1.1391	0.959388	n1cnc2c(c1N)ncn2C1C=C(C(C1O)O)CO
NPS	355637	0.868421	1.1971	c1(c(cc2c(c1OC)c1ccc(c(=O)cc1C(CC2)NC(=O)OCC)OC)OC)OC
NPS	642099	0.146617	0.0106347	C1CCC([C@@H]2C31[C@H]1C4([C@]([C@H]2O)(OC3)O)C(C(CC1)C(=C)C4=O)O)(C)COC(=O)C
NPS	785149	1.31955	0.541825	c1(c(c2c3c(c1OC)ccnc3C(=O)c1c2cccc1)OC)OC
NPS	785161	1.59023	0.0231779	O(C)c1c2c3[C@H](Cc4c2cc2c(c4)OCO2)N(C)CCc3cc1OC	ANTAGONIST
NPS	785173	1.1391	1.16815	O(C)c1c2c3c(cc1OC)CCN([C@@H]3Cc1ccc(cc1)Oc1c3[C@H](Cc4ccc(O2)cc4)N(C)CCc3cc(c1O)OC)C
NPS	785185	1.22932	0.783414	C([C@H]1c2c(cc(c(c2)OCC)OC)CCN1)c1ccc(cc1)O.c1ccc(cc1)[C@H](C(=O)O)O
NPS	93674	1.06839	0.621222	c1(c2c3c(cc1OC)CCN(C)[C@H]3Cc1ccc(cc1)Oc1c(ccc(C[C@@H]3c4c(cc(c(O2)c4)OC)CCN3C)c1)O)O
NPS	100880	1.56387	1.0897	c1ccc2c(c1)cc1c(n2)c2n(C1)c(=O)c(c(c2)[C@](C(=O)O)(O)CC)CO.[Na+]
NPS	112907	1.74968	1.1239	O=C1N(CCC(N1)O)C1OC(CO)C(C1O)O
NPS	127473	2.24516	0.851104	N1C(=O)NC2C1CSC2CC/C=C/C(=O)O
NPS	145612	0.417293	0.620362	Cc1c(c2c3c4c1OC(C)(C4=O)O/C=C\C(C(C)C(C(C)C(C(C)C(C(C)/C=C\C=C(\C)/C(=O)Nc(c(CN(C)C)c3O)c2O)O)O)OC(=O)C)OC)O
NPS	177383	0.417293	0.405178	C\1=C/C(OC)C(C(OC(=O)C)C(C(C(C(C2CC2C(=O)/C=C(\C(=O)NC2=C/C(=N\C3C(OC(CC3)O)C)/c3c4c(OC(O1)(C4=O)C)c(c(c3C2=O)O)C)/C)O)C)O)C)C
NPS	247562	0.327068	0.103102	[nH]1c(cc2c1CCCCCCC2CCCC)/C=C/1\N=C(C=C1OC)c1[nH]ccc1.Cl	ANTAGONIST
NPS	269146	1.68045	1.01552	O1C(C(C(CC1OC1C(C(OC(Oc2cc3cc4C[C@@H]([C@@H](C(=O)[C@H]([C@H](O)C)O)OC)[C@H](OC5OC(C(C(OC6OC(C(C(OC7OC(C(C(C7)O)OC)C)C6)O)C)C5)O)C)C(=O)c4c(c3c(c2C)O)O)C1)C)O)O)O)C
NPS	292463	1.22932	0.276039	CC12C34C(C5C(CC3)(O5)C)OC(C31CO3)CC2OC(=O)/C=C/C=C/C(=O)OCCC(C(C(=O)OC4)OC(=O)C)C	ANTAGONIST
NPS	335989	1.1391	1.14952	O=c1cc2[C@H](CCc3cc(c(c(c3c2ccc1OC)OC)O)OC)NC(=O)C(F)(F)F
NPS	407308	1.22932	0.921067	O1C(Oc2c3C(=O)CC(Oc3cc(c2)OC)c2ccc(cc2)O)C(C(C(C1CO)O)O)O
NPS	785144	0.868421	0.373199	c1(c2c3c(c(c1OC)OC)ccnc3c1c2ccc(c(=O)c1)OC)OC
NPS	785156	1.22932	0.568434	c12c3c(c4c(cc3CCN2)OCO4)c2c(c1)cccc2
NPS	785168	1.68045	0.570219	c1(c(c2c3ccccc3cc3c2c(c1)CCN3C)O)OC.Br
NPS	785180	1.77068	1.19304	C(C)[C@@]12[C@H]3[C@@]4(C(=C(C1)C(=O)OC)Nc1c4cccc1)CCN3CCC2
NPS	99794	0.820645	0.782125	O=C1N2C3C4C5C(=CCOC4C1)CN1C(C5)(C3(CC1)c1c2cc(c(c1)OC)OC)O
NPS	106995	1.13032	1.13394	n1c2c(nc3c(ccc(c13)C(=O)OC)O)c(c(cc2O)O)C=O
NPS	121860	1.93548	1.08963	O1C(C2C3Nc4ccccc4C43C3N(CC4)CC(=CC1)C2C3)CC(=O)O
NPS	121860	0.75871	0.301372	CC1C2(OC(CC1OC1OC(C)C(CC1)OC)C1(C)OC3(CC1)OC(C(/C=C(/C(=O)C(CC(C(=O)O)C)C)\C)C)C(C(C3)O)C)OC(CC2C)C1OC(CO)(O)C(CC1C)C	UNKNOWN
NPS	159632	0.778195	0.992612	O=C1[C@@]([C@H](C2=COC(=CC2=C1C=O)C)O)(O)C
NPS	216128	0.507519	0.932678	O=C1OC(C/C=C/C=C(/C(C(CC(CC(CC(C(C1)O)C)C)C)C)O)\C#N)C1CCCC1C(=O)O
NPS	265211	0.68797	0.75321	O1C(OC2C(CC(OC2C)OC2C(OC(O[C@H]3C[C@]([C@@H](c4cc5C(=O)c6c(ccc(c6C(=O)c5c(c34)O)O)O)C(=O)OC)(O)CC)CC2N(C)C)C)O)CC(C(C1C)O)O
NPS	276382	1.31955	1.10087	Cc1c(C(=O)NC(C(c2c[nH]cn2)OC2C(C(C(C(CO)O2)O)O)OC2C(C(C(C(CO)O2)O)OC(=O)N)O)C(=O)NC(C)C(C(C)C(=O)NC(C(C)O)C(=O)NCCc2nc(cs2)c2nc(cs2)C(=O)NCCCNC(C)c2ccccc2)O)nc(C(CC(=O)N)NCC(C(=O)N)N)nc1N.OS(=O)(=O)O
NPS	327993	1.40977	0.874117	CC12C3(C4CC2OC(=O)/C=C/C=C/C(OCCC(C(C(=O)OCC21C(O4)C1C(C(C2)O)(O1)C)O)C)C(C)O)CO3
NPS	359079	1.22932	1.09012	Clc1cccc2c3c4c(c(=O)[nH]c4=O)c4c([nH]c5c4cccc5Cl)c3n(c12)C1OC(C(C(C1O)O)OC)CO
NPS	132791	1.04887	1.08733	O=C1[C@H]([C@@]2([C@H]3[C@]4(OC[C@@]53[C@H]([C@H]([C@H]4O)C)[C@@H](OC(=O)[C@](O)(C)CC)C(=O)O[C@@H]5C[C@H]2C(=C1)C)O)C)O
NPS	785150	1.22932	0.707866	c1(c(c2c3c(c1OC)c(cnc3C(=O)c1c2cccc1)OC)OC)OC
NPS	785162	1.1391	0.518633	O(C)c1c2c3c4[C@H](Cc2ccc1OC)N(C)CCc4cc1c3OCO1
NPS	785174	0.958647	1.33987	O(C)c1c2c3c(cc1OC)CCN([C@@H]3Cc1ccc(cc1)Oc1c3[C@H](Cc4ccc(O2)cc4)N(C)CCc3cc(c1OC)OC)C
NPS	785186	1.8609	0.196427	c1(c2c3C(Cc4c2cc(cc4)O)N(C)CCc3cc1OC)O	ANTAGONIST
NPS	95099	1.50194	0.892115	O1C(=O)C=C(C1)C1C(CC2(C1(CCC1C2CCC2C1(CCC(OC1OC(C(OC3OC(C(OC4OC(C(C(C4)O)O)C)C(C3)O)C)C(C1)O)C)C2)C)C)O)O
NPS	102816	2.4929	1.15853	n1c(nc(=O)n(c1)C1OC(C(C1O)O)CO)N
NPS	113087	1.13032	1.2129	N12CC3OC43COC(=O)C(C(C(C(=O)OC(C14)CC2)C)(O)C)(O)C
NPS	128487	1.74968	1.07246	C1Oc2c(O1)cc1c(c2)C2C(C(=CC32N(CC1)CCC3)OC)O
NPS	146396	0.327068	0.625475	O1c2c(OC1)cc1c3N(C(c4cc(c(cc4c3ccc1c2)OC)OC)OC)C
NPS	179834	0.507519	0.947259	O=C1[C@]2([C@@]3(O[C@@H]3C[C@@H]3[C@@H]2CC[C@]2([C@]3(CC[C@]2([C@@]([C@@H]2OC(=O)C(=C(C2)C)C)(C)O)O)O)C)CC=C1)C
NPS	248605	-0.0225564	0.0382687	CC(C1C2=C(C(=O)CC1(C)O)C(=O)c1c(ccc(c3ccc4c(c3O)C(=O)C3=C(C(C(C)OC(=O)C)C(C)(CC3=O)O)C4=O)c1O)C2=O)OC(=O)C
NPS	269148	0.507519	0.902124	[C@@H]1([C@@H]([C@H]2O[C@@]([C@@H]1O)(c1c(O2)c2C(=O)c3cc4C[C@@](C[C@@H](c4c(c3C(=O)c2c(c1)O)O)OC)(C)O)C)O)N(C)C
NPS	294408	2.04135	0.567222	C1(C(OC2(C1=O)C(OC(=O)C)C1(C(C2)N2C(=O)C3(SSC2(C1)C(=O)N3C)CO)O)C)(C)C
NPS	337851	1.40977	0.841627	O=C1C=C[C@@]2([C@H]3C(=O)C[C@]4([C@@H](CC[C@@]4(C(=O)COC(=O)CSc4c5ccc(cc5nc5c4ccc(c5)N(C)C)N(C)C)O)[C@@H]3CCC2=C1)C)C
NPS	407806	2.76316	1.19827	C1[C@@H](C[C@@H]2[C@](C1)([C@@H]1[C@@H](CC2)[C@@]2([C@](CC1)([C@H](CC2)C1=CC(=O)OC1)C)O)C)O
NPS	785145	1.8609	0.0261595	c1ccc2c(c1)c1c3[C@@H](C2)N(CCc3cc(c1OC)OC)C	ANTAGONIST
NPS	785157	1.04887	0.717703	c12c3c4c(ccc3C[C@H]3c1c(cc1c2OCO1)CCN3)OCO4
NPS	785169	1.59023	1.2065	c1c2c3c(c4cc(ccc4C[C@@H]3N(CC2)C)OCC)c(c1OC)O
NPS	785181	0.507519	0.593759	c1(ccc2c(c1OC)c1c3[C@H](C2)N(CCc3cc2c1OCO2)C)O
NPS	99799	1.74968	0.776751	n1c(c2cc(c(cc2cc1)O)O)Cc1cc(c(cc1)O)O.Br
NPS	107041	1.31613	0.0867353	N(CCC/C=C/CCCC(CC(C1C(/C=C/C=C/C(C(C(CC(CC(CC2OC(CC(CCCC(C(C(C(C(C(/C=C/C(C(C(=O)O1)C)O)C)O)C)O)C)O)O)(C(C(C2)O)O)O)OC(=O)CC(=O)O)O)O)C)O)C)C)C)(C(=N)N)C
NPS	121865	1.87355	1.02862	O1C(C2C3Nc4cc(c(cc4C43C3N(CC4)CC(=CC1)C2C3)OC)OC)CC(=O)O
NPS	165563	0.327068	1.00585	O=C1C[C@@]2([C@H]3[C@H]([C@@H]([C@]4(OC[C@@]53[C@H]4[C@H](C(=O)O[C@@H]5C[C@H]2C(=C1O)C)OC(=O)/C=C(/C(C)C)\C)C(=O)OC)O)O)C
NPS	218321	1.31955	0.824155	C(C1OC(CC1O)n1cnc2[C@@H](CNC=Nc12)O)O
NPS	265450	0.597744	0.602713	C12(OC(Oc3c2cc(c2c3C(=O)c3cc4CC(CC(OC5OC(C(C(C5OC)(C)OC)OC)C)c4c(c3C2=O)O)(C)O)O)C(C(C1O)N(C)C)O)C
NPS	278619	1.31955	1.07453	[C@@H](N)(C)C(=O)NC(C(O)C(C=O)N)CO.Cl
NPS	328166	1.1391	0.653483	CC12C34C(C5C(C(C3)O)(O5)C)OC(C31CO3)CC2OC(=O)/C=C/C=C/C(=O)OCCC(C(C(=O)OC4)O)C
NPS	361792	1.04887	1.15894	CC(=O)NC1CCc2cc(c(c(c2c2ccc(c(=O)cc12)SC)OC)OC)O
NPS	178249	0.597744	0.902871	O1[C@@H]2Oc3c(c4oc5c(ccc(c5c(=O)c4c(c3)OC)O)OC)[C@@H]2C=C1
NPS	785151	0.868421	1.16658	c1(c(c2c(=O)c(=O)[nH]c3c2c(c1OC)c1ccccc1c3)OC)OC
NPS	785163	1.04887	0.0240472	O(C)c1c2c3c(c4c1OCO4)c1c(C[C@@H]3N(CC2)C)c(c(c(c1)OC)OC)O	ANTAGONIST
NPS	785175	1.5	1.24516	c1(c2[C@@]34[C@@H]([C@H](Cc2ccc1OC)N(CC4)C)C=C(C(=O)C3)OC)O
NPS	785187	1.59023	0.327005	O(C)c1c2c3[C@H](Cc4c2c(OC)c(cc4)OC)NCCc3cc1OC.Cl	ANTAGONIST
NPS	96021	1.68774	0.905458	O1C2(NCC(CC2)C)C(C2C1CC1C2(CCC2C1CC=C1C2(CCC(C1)OC(=O)C)C)C)C
NPS	104943	1.19226	1.04146	O1[C@@H]2[C@@]3([C@H]([C@]4(OC4)C[C@H]([C@H]2C(=C)C1=O)OC(=O)/C(=C\C)/C)[C@@H](C=C3C)OC(=O)C)O
NPS	113497	0.882581	0.585578	O=C1C=CC2(C3CCC4(C(OC(=O)C5OC45C3(C(CC2C1(C)C)OC(=O)C)C)c1ccoc1)C)C
NPS	129230	1.31613	0.927594	O=C1OC2CCN3C2C(=CC3)COC(=O)C(C2(C(C1=C)C)OC2)(C)O
NPS	147340	1.40977	1.24502	N1[C@H]([C@H]([C@@H](C1)O)OC(=O)C)Cc1ccc(cc1)OC.Cl
NPS	180516	0.417293	0.968907	C(C(CO)(C)O)(O)C12C(=O)NC(C(=O)N1)(O)C(=C)CCO2
NPS	248958	1.1391	0.813297	C(=C\C(C(=O)CC(O)CC1CC(=O)NC(=O)C1)C)(/C)\C=C/C
NPS	269753	1.22932	1.19947	O=C1OC[C@]23[C@H](O[C@H]4[C@]5([C@@]2([C@H](OC(=O)/C=C\C=C\C(OCC(C(C1)C)O)C(O)C)C4)C)OC5)C=C([C@H](C3)O)C
NPS	295426	1.95113	0.497267	C1C/C(=C/C2OC(=O)C(=C)C2C(C/C(=C/1)/CO)OC(=O)C(C)C)/CO
NPS	343256	0.056391	0.0369017	O(C1CC2/C=C(\C=C\C=C\C(=O)NC(C/C=C/CCC(CC(=O)C2=C1O)O)c1ccccc1)/C)C
NPS	601422	2.31203	1.13975	c1ccc(c2[C@@H]3N4[C@H](Cc12)C1N(C([C@@H]4OC3)C[C@@H]1C(=O)O)C)OC.OC(=O)CC(O)(C(=O)O)CC(=O)O
NPS	785146	2.67293	0.723092	c1(ccc2c(c1OC)c1c3[C@H](C2)N(CCc3cc(c1OC)OC)C)OC.C(=O)([C@@H]([C@H](C(=O)O)O)O)O
NPS	785158	0.868421	0.332719	c1(c2c3[C@H](Cc4c2cc(c(c4)O)OC)N(C)CCc3cc1OC)O	ANTAGONIST
NPS	785170	2.31203	0.106078	c1c2c3c(c4ccccc4C[C@@H]3N(CC2)C)c(c1OC)O.Br	ANTAGONIST
NPS	785182	2.13158	0.607607	c1(ccc2c(c1OC)c1c3[C@H](C2)N(CCc3cc2c1OCO2)C)O.Br
NPS	99804	1.44	0.698925	N12CC3C4(CC56OC7(C(CCC5(C7CCC6C4(CC(C3(C(C1CCC(C2)C)(O)C)O)O)O)C)O)O)O
NPS	107453	1.13032	0.95474	c1c(ccc(c1)C)S(=O)(=O)NNC(=O)c1cc(c(cc1N)C)C
NPS	123383	1.37806	1.04594	o1c(c2cc(c(cc2)OC)OC)cc(=O)c2c1cc(cc2)O
NPS	141538	1.31613	0.795708	O=C1CCC2(OC2)C(C1OC)(C1(OC1CC=C(C)C)C)O
NPS	169517	0.056391	0.0300738	O=C1CC(Oc2c1c(cc(c2)O)O)C1=CC(=O)C(=CC1=O)OC
NPS	227186	0.597744	0.316427	c1(ccc2c(c1Cl)oc(=O)c(c2O)NC(=O)c1ccc(c(c1)CC=C(C)C)O)OC1OC(C(C(C1O)OC(=O)c1ccc([nH]1)C)OC)(C)C
NPS	266032	1.31955	0.796868	O=C1[C@H]2[C@](O2)([C@H](C=C1)O)CO
NPS	281245	0.958647	0.897837	C(CC)(C)C(=O)OC1CCC=C2C1C(C(C=C2)C)CCC1CC(CC(=O)O1)O
NPS	328426	2.49248	0.850862	C(=C\C(=O)OC1C(COC2(C1)C1(CO1)C1C(O2)CC(CC1)C(=O)OC1C(C(C(C(O1)C)O)OC(=O)C)OC1OC(C(C(OC(=O)C)C1O)O)C)C)/c1ccccc1
NPS	365793	0.056391	0.00976579	O=C1C(=CC(=O)C(=C1O)C(C)CCC=C(C)C)C
NPS	256942	1.68045	0.915951	c1cc(c2c(c1)C(=O)c1c(C2=O)c(c2c(c1O)C[C@](C[C@@H]2OC1OC(C(C(C1)N)O)C)(C(=O)CO)O)O)OC.Cl
NPS	785152	1.1391	1.15992	CN1[C@H]2c3c(c4c(C2)ccc(c4O)OC)cccc3CC1.Cl
NPS	785164	1.5	0.0719233	CN1[C@H]2c3c(c4c(cc3CC1)OCO4)c1c(C2)cccc1.Cl	ANTAGONIST
NPS	785176	1.40977	1.12845	c1(c(c2c3c(c1)CCN(C3Cc1c2cc(cc1)N(Cc1ccccc1)Cc1ccccc1)C)O)OC.Cl
NPS	785188	2.2218	0.956265	c1(ccc2c(c1O)c1c3[C@H](C2)N(CCc3cc2c1OCO2)C)OC
NPS	98542	1.74968	0.733467	n1c(c2cc(c(cc2cc1)OC)OC)Cc1c(cc(c(c1)OC)OC)C(=O)C
NPS	105827	2.18323	1.13279	O1C(C(C(C1n1c2ncnc(c2c(c1)C(=S)N)N)O)O)CO
NPS	114341	1.50194	1.00586	n1c(cc(cc1/C=N\O)OC)c1ncccc1
NPS	135962	1.37806	0.780998	O(C(=O)CCCCCCCCCCCCCCC)CC1OC(n2ccc(nc2=O)N)C(C1O)O
NPS	148790	1.04887	1.06337	O1C(=O)C=C(C1)C1C(CC2(C1(CCC1C2CCC2C1(CCC(C2)O)C)C)O)OC(=O)C
NPS	184398	1.31955	0.7181	O1C(c2ccc3C(=O)C4=C(C(=O)c3c2O)C=CC2(C4(C(=O)CC(C2)(O)C)O)O)CC(C(C1C)O)O
NPS	250682	0.597744	0.156814	C1(CC[C@@H]([C@]23[C@H]4C5(C(=O)C(=C)C(CC4)[C@H]5O)[C@@](OC3)([C@H]([C@H]12)O)O)O)(C)C
NPS	269754	1.68045	1.28381	CC12C3(C4CC2OC(=O)/C=C/C=C/C(OCC(C(CC(=O)OCC21C(O4)C=C(C(C2)O)C)C)O)C(C)O)CO3
NPS	302979	0.507519	0.123659	O(C1CCC2(C(C1(C)C)CC(C1=CC(CCC2=O)C(=C)C1=O)O)C)C(=O)C
NPS	349155	1.95113	1.0993	c1c2c(cc3c1OCO3)C(=O)NC1C(C(C(C=C21)O)O)O
NPS	607097	1.04887	0.994701	c12cccc(c1C(N1C(C2)C2N(C(C1C#N)CC2C(=O)O)C)CO)OC
NPS	785147	1.5	0.70798	c1(ccc2c(c1OC)c1c3[C@H](C2)N(CCc3cc2c1OCO2)C)O.c1c(cc(c(c1[N+](=O)[O-])O)[N+](=O)[O-])[N+](=O)[O-]
NPS	785159	1.22932	0.15507	c1(c2c3[C@H](Cc4c2cccc4)N(C)CCc3cc1OC)O.Cl	ANTAGONIST
NPS	785171	1.04887	0.729613	O(C)c1c2c3c(c(c4c2cccc4)OC(=O)c2ccccc2)N(C)CCc3cc1OC
NPS	785183	2.13158	0.927264	c1cc(ccc1C[C@@H]1c2c(CCN1C)cc(c(c2)O)OC)Oc1cc(ccc1OC)C[C@H]1c2c(CCN1C)cc(c(c2)O)OC
NPS	99843	2.43097	0.774002	n1c(c2c(cn(c2nc1)C1OC(C(C1O)O)CO)C#N)N
NPS	108088	1.56387	0.913924	[nH]1c2c(C[C@@H]3N(C[C@@H](CC)[C@H](C3C(=O)OC)CC2=O)C)c2ccccc12
NPS	123389	1.00645	0.846891	N12C(c3cc4OCOc4cc3CC1)Cc1ccc(c(c1C2)OC)O
NPS	142227	0.820645	0.410719	O=C1C(OC(=C1)/C(=C/COc1ccc2c(c1)oc(=O)cc2)/C)(C)C
NPS	170365	0.597744	1.53963	CCC(C)C1C(=O)NC(C)C(=O)NC(=C)C(=O)NC(C)C(=O)NC23CCC(=NC3c3csc(C(C(C)OC(=O)c4cc(c5C=CC(C(c5n4)O)N1)C(C)O)NC(=O)c1csc(C(C(C)(C(C)O)O)NC(=O)C4CSC(=N4)/C(=C/C)/NC(=O)C(C(C)O)NC(=O)c4csc2n4)n1)n3)c1nc(cs1)C(=O)NC(=C)C(=O)NC(=C)C(=O)N
NPS	236580	2.40226	1.12957	O=C1C2N(C(=O)C(CC(C)C)OC(=O)CCNC(=O)C(N(C(=O)C(N(C(=O)C(N1)C(CC)C)C)C(C)C)C)C)CCC2
NPS	266071	0.597744	0.941619	O(C1C(OC(=O)C)C(OC(=O)C)C2(C1C(CC1C(C2)C(C(=O)O1)C)C)C)C(=O)C
NPS	283445	1.1391	0.184599	O=C1OCC23[C@@H]([C@H]4C(O4)(CC2)C)O[C@@H]2C[C@@H](OC(=O)/C=C\C=C\C(=O)OCC[C@H]([C@@H]1O)C)[C@]3([C@@]12OC1)C	ANTAGONIST
NPS	330500	0.417293	0.272249	c1c(cc2c(c1C(C(CC(C(C(/C=C(\C(C(/C=C\C=C(\C(=O)N2)/C)C)OC(=O)N)/C)C)OC)OC)C)OC)O)O	ANTAGONIST
NPS	376128	3.12406	1.31023	c1ccccc1C[C@H](c1sccn1)NC(=O)[C@H]([C@@H]([C@@H]1N(CCC1)C(=O)C[C@@H]([C@@H]([C@H](C)CC)N(C(=O)[C@@H](C(C)C)NC(=O)[C@@H](C(C)C)N(C)C)C)OC)OC)C
NPS	320301	2.13158	1.06112	O=c1cc2[C@H](CCc3cc(c(c(c3c2ccc1SC)OC)OC)OC)NC(=O)C(F)(F)F
NPS	785153	1.40977	1.15703	CN1[C@H]2c3c(c4c(C2)ccc(c4OC)OC)cccc3CC1.Cl
NPS	785165	0.958647	1.13631	c1(c2c3C(Cc4c2cc(cc4)N(Cc2ccccc2)Cc2ccccc2)N(C)CCc3cc1OC)O.Cl
NPS	785177	0.958647	0.0567747	c1(c(c2c3c(c1)CCN(C3Cc1c2cccc1)C)O)OC.Cl	ANTAGONIST
NPS	785189	1.40977	0.0841624	c1(c(c2c3c(c1)CCN([C@H]3Cc1c2cc(c(c1)O)OC)C)OC)OC.Br	ANTAGONIST
NPL	ST001202	0.949023	1.00797	OCC1OC(Oc2ccc3c(c2O)oc(=O)cc3)C(C(C1O)O)O
NPL	ST008373	0.798144	0.856677	O=c1cccc2n1CC1CNCC2C1
NPL	ST013856	1.0497	0.969593	Cc1nccc2c1[nH]c1c2cccc1
NPL	ST019399	0.85503	0.947126	OCc1occ(c(=O)c1)O
NPL	ST023803	0.946201	1.02604	CC1CC[C@@]2(NC1)O[C@@H]1[C@H]([C@@H]2C)[C@@]2([C@@H](C1)[C@@H]1CC=C3[C@]([C@H]1CC2)(C)CC[C@@H](C3)O)C
NPL	ST024715	0.8939	0.86329	COc1cc2ccc(=O)oc2c(c1O)O
NPL	ST024785	0.786168	0.421251	OCC(=C)C1Oc2c(C1)c1oc3COc4c(c3c(=O)c1cc2)cc(c(c4)OC)OC
NPL	ST036784	1.08793	0.907768	OCCC1=CC[C@@H]2CC1C2(C)C
NPL	ST047929	0.854512	0.499115	COc1c(OC)ccc2c1CN1CCc3c(C1C2)cc1c(c3)OCO1
NPL	ST055369	0.848621	0.869167	O=c1cc(oc2c1cccc2C)c1ccccc1
NPL	ST055761	2.2465	1.0143	OC(=O)CCCC[C@@H]1SC[C@H]2[C@@H]1NC(=O)N2
NPL	ST056008	0.941507	0.727208	Oc1ccc(cc1)c1oc2cc(O)ccc2c(=O)c1O
NPL	ST056282	1.01453	0.225505	C=CC1CN2CCC1CC2[C@@H](c1ccnc2c1cc(OC)cc2)O	ANTAGONIST
NPL	ST056303	0.98197	0.907676	CC[C@@H]1OC(=O)[C@H](C)[C@H](O[C@H]2C[C@@](C)(OC)[C@H]([C@@H](O2)C)O)C(C)[C@H](O[C@H]2O[C@@H](C)C[C@H]([C@@H]2O)N(C)C)[C@@](C[C@@H](C(=O)[C@H]([C@@H]([C@@]1(C)O)O)C)C)(C)O.O
NPL	ST056351	1.02858	0.878674	COC(=O)[C@@H]1[C@@H](O)CC[C@H]2[C@@H]1C[C@@H]1N(C2)CCc2c1[nH]c1c2cccc1.Cl
NPL	ST056936	1.07434	1.03842	OCC1OC(C(C1O)O)n1cc(OC)c(=O)[nH]c1=O
NPL	ST057084	1.54681	1.12511	O[C@@H]1[C@H](O)[C@H](O[C@H]1n1cnc2c1nc[nH]c2=O)COP(=O)([O-])[O-].[Na+].[Na+]
NPL	ST057151	1.16397	1.30005	O=C1CC2C(O1)(C)CCC1[C@]2(C)CCCC1(C)C
NPL	ST057172	1.10298	1.047	CC(CCCC(C1CCC2C1(C)CCC/C/2=C\C=C\1/CC(O)CCC1=C)C)C
NPL	ST057238	0.903241	0.86593	Oc1ccc2c(c1)[nH]c1c2CCN=C1C
NPL	ST001365	0.737104	0.817729	CCCCOC(=O)c1cc(O)c(c(c1)O)O
NPL	ST008376	0.969167	0.878628	OC(=O)c1cc(C)c(cc1C(=O)N1CC2CC(C1)c1n(C2)c(=O)ccc1)[N+](=O)[O-]
NPL	ST013858	0.881267	0.824949	OC(=O)c1oc(cc(=O)c1)C(=O)O
NPL	ST019426	0.735507	0.811582	Oc1ccc2c(c1)CCC1C2CCC2(C1CCC2=O)C
NPL	ST024696	0.896831	0.846117	OC1CCC2C1=Nc1ccccc1C2.Cl
NPL	ST024716	0.819306	0.86172	COc1cc2cc(Oc3ccc4c(c3)oc(=O)cc4)c(=O)oc2cc1O
NPL	ST024787	0.770627	0.735357	COC(C(C(=O)OC1=CCN2[C@H]1[C@@H](O)CC2)(C(C)C)O)C
NPL	ST037059	0.853829	0.872342	O=C(c1ccccc1)NCC(=O)O
NPL	ST048776	1.0746	0.739516	OC(=O)[C@H](Cc1c[nH]c2c1cc(O)cc2)N
NPL	ST055519	0.970607	0.860445	OC(=O)[C@@H]1N2C(=O)C(C2SC1(C)C)N
NPL	ST055762	1.48881	0.295165	CO[C@]12C[C@@H](COC(=O)c3cncc(c3)Br)CN([C@@H]1Cc1c3c2cccc3n(c1)C)C	ANTAGONIST
NPL	ST056009	0.988402	0.837468	Oc1ccc(cc1)c1oc2ccc(cc2c(=O)c1O)O
NPL	ST056283	0.905825	0.903509	CC(C1=CC2=CCC3[C@](C2CC1)(C)CCCC3(C)C(=O)O)C
NPL	ST056304	0.823026	0.863855	COC1=CC(=O)CC(C21Oc1c(C2=O)c(OC)cc(c1Cl)OC)C
NPL	ST056352	0.953961	0.822149	Oc1ccc(cc1)c1coc2c(c1=O)c(O)cc(c2)O
NPL	ST056938	0.975642	0.942192	OC[C@H]1O[C@H]([C@@H]([C@@H]1O)O)n1ccc(nc1=O)N
NPL	ST057085	1.09553	0.942867	O[C@H]1C[C@@H](O[C@@H]1COP(=O)(O)O)n1cnc2c1ncnc2N
NPL	ST057152	1.10685	0.896648	Oc1cc2oc(cc(=O)c2c(c1O)O)c1ccccc1
NPL	ST057174	1.13682	0.953888	CCCCc1ccc(nc1)C(=O)O
NPL	ST057239	0.804014	0.730443	Oc1ccc2c(c1)[nH]c1c2ccnc1C
NPL	ST001459	1.24027	1.02634	COC1OC2COC(OC2C(C1O)O)c1ccccc1
NPL	ST009496	24.237	0.874337	OC[C@H]1O[C@H]([C@@H]([C@@H]1O)O)n1cnc2c1ncnc2N
NPL	ST013859	1.40503	1.03308	OC1C(O)C(OC1n1ccc(nc1=O)N)COP(=O)([O-])[O-].[Na+].[Na+]
NPL	ST023280	0.93165	0.87833	CN(Cc1c[nH]c2c1cccc2)C
NPL	ST024698	1.00616	0.775119	CC(=O)Oc1ccc(cc1)/C=C/C(=O)CC1OC(Oc2cc(OC(=O)C)c3c(c2)O[C@H](CC3=O)c2ccc(cc2)OC(=O)C)C(C(C1OC(=O)C)OC(=O)C)OC(=O)C
NPL	ST024717	0.987684	0.888401	COc1cc2ccc(=O)oc2c(c1OCC=C(C)C)O
NPL	ST024789	0.965104	0.989173	Cn1ccc(c(c1=O)C#N)O
NPL	ST038567	0.889985	0.836875	COc1cc2oc(=O)cc(c2cc1OC)C
NPL	ST048855	1.19348	0.660927	COc1cc2c(cc1OC)cc1c3c2c(OC)c(OC)cc3CCN1C
NPL	ST055522	1.12192	0.810204	OCC1OC(C(C1O)O)n1cnc2c1ncnc2
NPL	ST055798	0.968308	0.736389	COc1c(OC)ccc2c1c[n+]1CCc3c(c1c2)cc1c(c3)OCO1
NPL	ST056010	1.02956	0.911852	Oc1cc(ccc1O)c1cc(=O)c2c(o1)cccc2O
NPL	ST056285	0.823717	0.944743	COC(=O)C1(O)CC2(CC)CCCN3C2c2n1c1ccccc1c2CC3
NPL	ST056305	1.07913	1.03933	C=CC1CN2CCC1CC2[C@H](c1ccnc2c1cccc2)O
NPL	ST056390	1.24276	1.13997	COc1c(OC)cc2c(c1OC)c1ccc(c(=O)cc1C(CC2)NC(=O)C)OC
NPL	ST056939	1.2268	1.01003	OC[C@H]1O[C@H]([C@H]2[C@@H]1OC(O2)(C)C)n1ccc(=O)[nH]c1=O
NPL	ST057086	1.25659	1.03223	O[C@H]1C[C@@H](O[C@@H]1COP(=O)(O)[O-])n1cnc2c1nc(N)[nH]c2=O.[Na+]
NPL	ST057153	1.27937	1.02509	O[C@H]1CC(=C2C([C@@H]3[C@@H]1[C@H](C)C(=O)O3)C(=CC2=O)C)C
NPL	ST057176	1.29149	1.13913	Oc1cc2O[C@H](c3ccc(c(c3)O)O)[C@H](Cc2c(c1)O)O
NPL	ST057241	1.5076	1.29105	COc1c(O)cc2c(c1CC=C(C)C)c(=O)c1c(o2)cc(c(c1O)CC=C(C)C)O
NPL	ST001556	0.679921	0.718685	O=C1OC2C(C1=C)C[C@@H]1[C@](C2)(C)CCCC1=C
NPL	ST009819	1.34715	0.90148	O=C([C@@H]1N2C=Cc3c([C@H]2[C@H]2[C@H]1C1COC(O1)C2=O)cccc3)c1ccccc1
NPL	ST013860	5.53255	0.908591	OCC1OC(C(C1O)OP(=O)(O)O)n1cnc2c1ncnc2N	AGONIST
NPL	ST023298	0.632413	0.322088	CC(=O)O[C@H]1CC[C@@]2(C(C1(C)C)CC[C@]([C@H]2COc1ccc2c(c1)oc(=O)cc2)(C)O)C	UNKNOWN
NPL	ST024699	1.05238	0.741563	CC(=O)Oc1cc(OC(=O)C)c2c(c1)oc(cc2=O)c1ccc(c(c1)OC(=O)C)OC(=O)C
NPL	ST024722	0.894773	0.947864	O[C@@H]1CC[C@]2([C@@H](C1)C[C@H]([C@@H]1[C@@H]2C[C@H](O)[C@]2([C@H]1CC[C@@H]2[C@@H](CCC(=O)O)C)C)O)C
NPL	ST024792	0.951256	0.725739	COc1ccc2c(c1)[nH]c1c2CCN2[C@H]1C[C@H]1C(C2)C(C)OC=C1C(=O)OC
NPL	ST038949	1.00014	0.834856	O=c1cccc2n1CC1CN(CC2C1)c1nc(nc(n1)N1CCCC1)N1CCCC1
NPL	ST049155	0.75011	0.615264	CO[C@H]1/C=C/O[C@@]2(C)Oc3c(C2=O)c2c(O)c(C=O)c(c(c2c(c3C)O)O)NC(=O)/C(=C\C=C\[C@@H]([C@@H]([C@H]([C@H]([C@H]([C@@H]([C@@H]1C)OC(=O)C)C)O)C)O)C)/C
NPL	ST055619	1.06773	0.902495	OC(=O)CCC(=O)OCC1OC(C(C1O)O)n1cnc2c1ncnc2N
NPL	ST055878	1.11856	0.85037	OC[C@H]1O[C@@H](Oc2cc(O)cc(c2C(=O)CCc2ccc(cc2)O)O)[C@@H]([C@H]([C@@H]1O)O)O
NPL	ST056011	1.12269	0.876989	Oc1cc(O)c2c(c1)oc(cc2=O)c1ccccc1O
NPL	ST056286	1.13791	0.854974	CNC(=O)Oc1ccc2c(c1)C1(C)CCN(C1N2C)C
NPL	ST056306	1.1066	0.968817	OCC1OC2C([C@@H]1O)Oc1n2ccc(=N)n1.Cl
NPL	ST056392	1.49721	1.41149	O[C@H]1CC[C@]2([C@@H](C1)CC[C@@H]1[C@@H]2C[C@@H](O)[C@]2([C@]1(O)CC[C@@H]2C1=CC(=O)OC1)C)C
NPL	ST056941	1.22187	0.986328	OC[C@H]1O[C@H](C[C@@H]1O)n1cc(C)c(=O)[nH]c1=O
NPL	ST057088	1.29947	0.934543	OC[C@H]1O[C@H]([C@@H]([C@@H]1O)O)n1cnc2c1nc(N)nc2Cl
NPL	ST057154	1.63876	1.10687	CC[C@H]1C2C[C@@H]3N([C@@H]1O)[C@@H]1C2[C@@H](O)[C@]2([C@H]3N(C)c3c2cccc3)C1
NPL	ST057178	0.985934	0.945447	OCC(c1ccccc1)C(=O)O[C@@H]1C[C@H]2CC[C@@H](C1)N2C
NPL	ST057242	1.11217	1.10448	O=C1O[C@H]2[C@H]([C@@H]1[C@]1(O)C[C@@H]3[C@]4([C@@]1([C@@H]2OC4=O)C)O3)C(O)(C)C
NPL	ST002790	0.844162	1.05969	COC(=O)CCC(C1CCC2C1(C)[C@@H](O)CC1C2[C@H](O)CC2C1(C)CC[C@H](C2)O)C
NPL	ST009844	0.722094	0.703818	O=C1C2OCC(O2)[C@H]2[C@H]1[C@H]1C=Cc3c(N1[C@@H]2C(=O)c1ccc(cc1)C)cccc3
NPL	ST013862	1.11945	1.07586	OCC1OC(Oc2ccc(cc2)[N+](=O)[O-])C(C(C1O)O)NC(=O)C
NPL	ST023300	1.05344	0.84151	COc1ccc2c(c1)[nH]c1c2CCN=C1C
NPL	ST024700	0.887626	0.187187	CC(=O)OCC1OC(Oc2cc(OC(=O)C)c3c(c2)oc(cc3=O)c2ccc(c(c2)OC(=O)C)OC(=O)C)C(C(C1OC(=O)C)OC(=O)C)OC(=O)C	ANTAGONIST
NPL	ST024724	1.02162	1.34624	COC(=O)CC[C@H]([C@H]1CC[C@@H]2[C@]1(C)[C@@H](O)C[C@H]1[C@H]2CC[C@H]2[C@]1(C)CC[C@H](C2)O)C
NPL	ST025231	0.938576	1.02001	N[C@@H](C(S)(C)C)C(=O)O
NPL	ST039863	0.860697	1.10048	O=c1c2ccccc2[nH]c2c1cccc2
NPL	ST049442	1.06675	1.1072	CC(CCCC(C)C)CCCC(CCCC(=O)C)C
NPL	ST055624	1.03945	1.05304	COc1ccc(cc1O)[C@@H]1CC(=O)c2c(O1)cc(cc2O)O
NPL	ST055981	1.12178	0.838237	COc1cc2oc(cc(=O)c2c(c1O)O)c1ccccc1
NPL	ST056013	0.883807	0.576488	Oc1cccc(c1)c1cc(=O)c2c(o1)c(O)c(cc2)O
NPL	ST056287	1.16449	1.06713	COc1cc2ccc(=O)oc2cc1O
NPL	ST056307	1.25903	1.06765	OC(=O)/C=C(\C=C\C1(O)C(=CC(=O)CC1(C)C)C)/C
NPL	ST056393	1.19052	1.08936	OC(=O)CNC(=O)C(Cc1c[nH]c2c1cccc2)N
NPL	ST056943	1.54523	1.12084	OC[C@H]1O[C@H]([C@@H]([C@@H]1O)O)n1cc(F)c(=O)[nH]c1=O
NPL	ST057089	2.11907	1.06774	OC[C@H]1O[C@H]([C@@H]([C@@H]1O)O)n1cnc2c1ncnc2NCc1ccccc1
NPL	ST057155	1.36521	1.08917	O=C1O[C@@H]2[C@@]3(C1)C(=O)O[C@H]1[C@]3([C@](C2)(O)C(C)(C)C)[C@@H](O)C(=O)O1
NPL	ST057180	1.00608	0.731287	CN1Cc2c(C3C1c1cc4OCOc4cc1CC3O)ccc1c2OCO1
NPL	ST057243	1.08954	0.994196	CC(=C)[C@@H]1[C@@H]2OC(=O)[C@H]1[C@]1([C@]3([C@@H]2OC(=O)[C@]23[C@@H](C1)O2)C)O
NPL	ST005095	0.890126	0.879757	OCCN1CC2CC(C1)c1n(C2)c(=O)ccc1
NPL	ST011742	0.868079	0.9387	O=C(Nc1ccccc1)OCC12COC3C(C2C)C(CC1C)(C)Oc1c3cccc1
NPL	ST013864	0.921257	0.831843	OC1C(O)C(OC1n1ccc(=O)[nH]c1=O)COP(=O)([O-])[O-].[Na+].[Na+]
NPL	ST023301	0.958938	0.788382	COc1ccc(cc1OC)Cc1nccc2c1cc(OC)c(c2)OC
NPL	ST024701	0.991927	0.45499	CC(=O)Oc1cc(OC(=O)C)c2c(c1)oc(c(c2=O)OC(=O)C)c1ccc(c(c1)OC(=O)C)OC(=O)C
NPL	ST024725	0.80425	0.927249	CCOC(=O)CC[C@H]([C@H]1CC[C@@H]2[C@]1(C)[C@@H](O)C[C@H]1[C@H]2CC[C@H]2[C@]1(C)CC[C@H](C2)O)C
NPL	ST026568	0.829389	0.79415	CC(=O)OC1CCC2(C(=CCC3C2CC[C@]2(C3CCC2C(=O)C)C)C1)C
NPL	ST040209	1.00808	0.740423	OC(=O)[C@@H](Cc1c[nH]c2c1cccc2)N
NPL	ST049519	1.03026	0.887894	COC[C@@]12CN(CC)C3[C@]4(C2[C@@H](OC)[C@H]3[C@@]2(C3C4C[C@@]([C@@H]3OC(=O)c3ccccc3)([C@H]([C@@H]2O)OC)O)OC(=O)C)[C@H](C[C@H]1O)OC
NPL	ST055628	0.983827	0.808455	OC(=O)CC[C@H](C(=O)O)NC(=O)c1ccc(cc1)NCc1c[nH]c2c(n1)c(=O)nc(n2)N.O
NPL	ST055985	1.17397	0.916138	Oc1c(O)cccc1c1cc(=O)c2c(o1)cccc2
NPL	ST056014	1.09326	0.676635	Oc1ccc(cc1O)c1oc2ccccc2c(=O)c1O
NPL	ST056288	0.876096	1.0391	Oc1cc(O)c2c(c1)oc(c(c2=O)O)c1ccccc1
NPL	ST056308	4.61247	0.95153	O=C(O[C@@H]1CC(O)(CC(C1O)O)C(=O)O)/C=C/c1ccc(c(c1)O)O
NPL	ST056911	1.32863	0.947684	OCC1OC(C(C1O)O)n1ncc(=O)[nH]c1=O
NPL	ST056944	28.3016	0.835918	Oc1cc(ccc1O)CC1NCCc2c1cc(O)c(c2)O.Br	UNKNOWN
NPL	ST057090	1.8802	0.990806	OC[C@H]1O[C@H]([C@@H]([C@@H]1O)O)n1cnc2c1ncnc2Cl
NPL	ST057156	1.20421	0.818055	COC(=O)[C@@H]1[C@@H](O)CC[C@@H]2[C@@H]1C[C@@H]1N(C2)CCc2c1[nH]c1c2cccc1
NPL	ST057183	0.766972	0.611716	COc1cc(CNC(=O)CCCC/C=C/C(C)C)ccc1O
NPL	ST057247	1.12417	0.950773	COc1ccc(cc1O)C1CC(=O)c2c(O1)cc(cc2O)OC1OC(COC2OC(C)C(C(C2O)O)O)C(C(C1O)O)O
NPL	ST005140	1.06384	0.957608	Cc1ccc(cc1)CC(c1nc2c([nH]1)cccc2)Cc1nc2c([nH]1)cccc2
NPL	ST011914	1.16736	0.778799	OCC(C(C(Cn1c2cc(C)c(cc2nc2c1nc(=O)[nH]c2=O)C)O)O)O
NPL	ST013866	0.982397	1.00888	OCC1OC(Oc2ccc(cc2)[N+](=O)[O-])C(C(C1O)O)O
NPL	ST023308	0.955335	1.06116	COc1c(oc2c(c1=O)c(O)cc(c2)O)c1ccc(c(c1)O)O.O.O.O
NPL	ST024703	0.876045	0.860407	Oc1cc(O)c2c(c1)oc(cc2=O)c1ccc(c(c1)O)O
NPL	ST024726	1.07099	1.13745	CC1C(=O)OC2C1CCC(=C1C2C(=CC1=O)C)C
NPL	ST028625	0.954126	0.087994	COc1cc2c(cc1O)CC1c3c2c(OC)c(O)cc3CCN1C	ANTAGONIST
NPL	ST040521	0.990773	1.14985	OCC(C1OC(=O)C(=C1O)O)O
NPL	ST052001	0.988078	1.25332	COc1cc(C=O)ccc1O
NPL	ST055629	0.964586	0.806048	COc1cc(/C=C/C(=O)CC(=O)/C=C/c2ccc(c(c2)OC)O)ccc1O
NPL	ST055988	1.44867	1.18171	COc1c(oc2c(c1=O)cc(cc2)OC)c1ccccc1
NPL	ST056186	1.06531	1.11477	OCC1OC(OCC2OC(OC(c3ccccc3)C#N)C(C(C2O)O)O)C(C(C1O)O)O
NPL	ST056289	1.29136	1.10214	C[C@@H]1CC[C@]2([C@@H]([C@H]1C)C1=CC[C@H]3[C@@]([C@@]1(CC2)C)(C)CC[C@@H]1[C@]3(C)CC[C@@H](C1(C)C)O)C(=O)O
NPL	ST056309	1.12573	0.96514	OCC1OC(Oc2cc3ccc(=O)oc3cc2O)C(C(C1O)O)O
NPL	ST056912	1.18794	1.12699	OCC1O[C@H](C(C1O)O)n1c(Br)nc2c1nc(N)[nH]c2=O
NPL	ST057072	1.32818	1.09385	C/C=C\1/C[C@@H](C)[C@](O)(CO)C(=O)OCC2=CCN3[C@H]2[C@H](OC1=O)CC3
NPL	ST057091	2.75893	1.19068	OC[C@H]1O[C@H]([C@@H]([C@@H]1O)O)n1cnc2c1ncnc2NCc1ccco1
NPL	ST057157	1.52631	1.16405	O=C1CC[C@H](N1C)c1cccnc1
NPL	ST057184	0.449498	0.4533	CCCCCC[C@H]1C(=O)O[C@H](C)[C@@H](C(=O)O[C@H]([C@@H]1OC(=O)CC(C)C)C)NC(=O)c1cccc(c1O)NC=O
NPL	ST057248	1.13331	1.00885	CC/C=C\C[C@@H]1[C@H](CCC1=O)CC(=O)O
NPL	ST005141	0.898575	0.585823	COc1ccccc1CC(c1nc2c([nH]1)cccc2)Cc1nc2c([nH]1)cccc2
NPL	ST011964	0.798618	0.852213	OC(=O)CCCc1c[nH]c2c1cccc2
NPL	ST013872	0.942406	0.769888	OC1C(O)C(OC1n1ccc(nc1=O)N)COP(=O)(O)O
NPL	ST023474	1.4518	0.669138	CCCCCCCCCCC(C1CCC(O1)C1CCC(O1)C(CCCCCCCCCCC(CC1=CC(OC1=O)C)O)O)O
NPL	ST024704	1.09336	0.900836	OCC1OC(Oc2cc(O)c3c(c2)oc(cc3=O)c2ccc(c(c2)O)O)C(C(C1O)O)O
NPL	ST024728	0.771952	0.0446135	COc1ccc(cc1)c1coc2c(c1=O)cc(cc2)OC1OC(COC(=O)C)C(C(C1OC(=O)C)OC(=O)C)OC(=O)C	ANTAGONIST
NPL	ST028628	0.822093	1.25847	CC(=O)C1C(=O)C=C2[C@@](C1=O)(C)c1c(O)c(C)c(c(c1O2)C(=O)C)O
NPL	ST041029	0.906341	0.757257	COc1c2oc(=O)ccc2cc2c1occ2
NPL	ST053494	0.86738	1.04138	OC(=O)C1NC(C)c2c(C1)c1ccccc1[nH]2
NPL	ST055630	2.04703	0.761	NCCc1c[nH]c2c1cccc2OCc1ccccc1
NPL	ST055990	1.03013	0.683749	COc1cc2oc(cc(=O)c2cc1OC)c1ccccc1
NPL	ST056188	0.912787	0.786084	COc1ccc2c3c1OC1[C@@]3(CCN(C2)C)C=C[C@@H](C1)O
NPL	ST056290	0.863449	1.08802	C=C[C@](CC[C@H]1[C@](C)(O)CC[C@@H]2[C@]1(C)CCCC2(C)C)(O)C
NPL	ST056310	0.988055	0.94415	O=C1C=C2[C@@H]3C[C@](C)(CC[C@]3(C)CC[C@]2([C@]2([C@H]1[C@@]1(C)CC[C@@H](C([C@@H]1CC2)(C)C)O)C)C)C(=O)O
NPL	ST056915	1.18064	0.960639	Cc1cn([C@H]2CCC(O2)CO)c(=O)[nH]c1=O
NPL	ST057073	1.26328	1.04047	Oc1cc2c(=O)oc3c4c2c(c1O)oc(=O)c4cc(c3O)O
NPL	ST057092	1.50152	1.01018	O[C@@H]1[C@H](O)[C@H](O[C@H]1n1cnc2c1nc(N)[nH]c2=O)COP(=O)([O-])[O-].[Na+].[Na+]
NPL	ST057158	15.5169	0.820884	OC[C@@H](NC(=O)[C@H]1CN(C)[C@H]2C(=C1)c1cccc3c1c(C2)c[nH]3)C	AGONIST
NPL	ST057185	0.994174	0.810564	OC(=O)C(CC(=O)c1ccccc1N)N
NPL	ST057250	1.05395	0.967969	O=c1ccc2c(o1)cc1c(c2)cco1
NPL	ST005173	1.15573	0.91469	COc1ccc2c(c1OC)nc1c(c2OC)cco1
NPL	ST011970	1.1987	0.942114	COc1cc2C(C)NCCc2cc1O.Cl
NPL	ST013873	1.01274	0.951645	OC1CC(OC1COP(=O)(O)O)n1ccc(nc1=O)N
NPL	ST023485	0.930242	0.927096	OC(=O)CCCC(C(=O)O)N
NPL	ST024705	0.929171	1.08643	Oc1cc2O[C@@H](CC(=O)c2c(c1)O)c1ccccc1
NPL	ST024730	1.18567	1.26998	COc1cc2cc(Oc3ccc4c(c3)oc(=O)cc4)c(=O)oc2cc1OC(=O)C
NPL	ST029302	1.06385	1.21365	Cc1c(C)cccc1O
NPL	ST041691	1.04859	1.15963	CCN1C[C@@]2(CC[C@@H]([C@]34C1[C@@H](CC23)[C@@]1(O)C[C@@H](C2CC4[C@]1(O)[C@H]2OC)OC)OC)OC(=O)c1ccccc1NC(=O)C
NPL	ST053782	2.31181	1.23976	Oc1ccc(c(c1)O)C(=O)C
NPL	ST055634	165.214	1.3961	OC(=O)C(=O)O.CNCCc1c[nH]c2c1cc(O)cc2	AGONIST
NPL	ST055991	2.44933	1.24064	Oc1cccc(c1)c1oc2ccccc2c(=O)c1O
NPL	ST056196	0.896979	0.833099	COc1cc2c(cc1OC)CC1c3c2c(OC)c(c(c3CCN1C)CO)OC
NPL	ST056291	1.11727	1.05098	CCC1CN2CCC1CC2[C@H](c1ccnc2c1cc(OC)cc2)O
NPL	ST056311	1.11807	0.982902	OC(=O)[C@H]1C2C3(C4C51CC(=C)[C@](C5)(O)CC4)C=CC(C2(C)C(=O)O3)O
NPL	ST056916	1.14972	1.0956	OCC1CC[C@@H](O1)n1ccc(=O)[nH]c1=O
NPL	ST057075	1.68052	0.948842	C/C(=C\C=C\C(=C\C(=O)O)\C)/C=C/C1=C(C)CCCC1(C)C
NPL	ST057093	1.24286	1.07357	OC[C@H]1O[C@H](C[C@@H]1O)n1ccc(=O)[nH]c1=O
NPL	ST057159	1.23045	1.03054	O=C1O[C@@H]2[C@@]([C@@H]1C)(O)[C@@]13[C@]4([C@@H]2O)[C@@H](OC3=O)CC([C@@]24[C@H](O1)OC(=O)[C@@H]2O)C(C)(C)C
NPL	ST057186	1.21891	0.996584	OC[C@H]1O[C@@H](Oc2c(O)cc(c3c2oc(c2ccc(c(c2)O)O)c(c3=O)O)O)[C@@H]([C@H]([C@@H]1O)O)O
NPL	ST057251	1.09467	0.87296	Oc1ccc(cc1)/C=C/c1cc(O)cc(c1)O
NPL	ST005174	0.846664	0.85506	COc1c(OCC(C(O)(C)C)O)ccc2c1nc1occc1c2OC
NPL	ST011980	0.925281	0.796208	OC[C@@H]1OC(O)[C@H]([C@@H]([C@H]1O[C@H]1O[C@H](CO)[C@H]([C@@H]([C@H]1O)O)O)O)O
NPL	ST013878	0.84289	0.29644	O=c1ccn(c(=O)[nH]1)C1OC(C(C1OC(=O)c1ccccc1)OC(=O)c1ccccc1)COC(=O)c1ccccc1	ANTAGONIST
NPL	ST023489	0.857141	0.809258	OC1OC(C(=O)O)C(C(C1O)O)O
NPL	ST024706	0.852464	0.761742	Oc1cc(O)c2c(c1)oc(c(c2=O)O)c1ccc(c(c1)O)O
NPL	ST024731	0.758167	0.0664751	COc1ccc(cc1)c1coc2c(c1=O)c(OC(=O)C)c(cc2)OC1OC(COC(=O)C)C(C(C1OC(=O)C)OC(=O)C)OC(=O)C	ANTAGONIST
NPL	ST030560	0.941641	1.1306	Oc1ccc(cc1)c1oc2cc(O)cc(c2c(=O)c1O)O
NPL	ST044225	0.704891	0.762892	CO[C@H]1/C=C/O[C@@]2(C)Oc3c(C2=O)c2c(O)cc(c(c2c(c3C)O)O)NC(=O)/C(=C\C=C\[C@@H]([C@@H]([C@H]([C@H]([C@H]([C@@H]([C@@H]1C)OC(=O)C)C)O)C)O)C)/C
NPL	ST055352	0.845207	0.966457	O=C1c2ccccc2C(=O)c2c1ccc(c2O)O
NPL	ST055644	2.19393	0.859627	OCC1OC(CC1O)n1cnc2c1ncnc2N.O
NPL	ST055992	0.984384	0.99503	COc1cc(ccc1OC)c1oc2ccccc2c(=O)c1O
NPL	ST056204	1.49487	1.12035	CC(=CCc1c(O)cc(c2c1OC(CC2=O)c1ccc(cc1)O)O)C
NPL	ST056293	1.07426	0.30098	COc1ccc2c(c1O)c1c(OC)c(OC)cc3c1C(C2)N(C)CC3.Cl	ANTAGONIST
NPL	ST056312	1.03165	0.955551	OC(=O)C(Cn1ccc(=O)c(c1)O)N
NPL	ST056917	1.29158	0.935438	OCC1OC(C(C1O)O)n1ccc(nc1=O)NC(=O)c1ccccc1
NPL	ST057076	1.25212	1.00339	NCCC(=O)N[C@H](C(=O)O)Cc1nc[nH]c1
NPL	ST057094	1.35186	0.964219	OC[C@H]1O[C@H](C[C@@H]1O)n1ccc(nc1=O)N.O
NPL	ST057161	1.42859	0.992347	COc1ccc2c(c1OC)C(=O)O[C@@H]2[C@@H]1N(C)CCc2c1c(OC)c1c(c2)OCO1.Cl
NPL	ST057211	1.03402	0.873051	O=C1C=C2CC3(C(=C2C=C1O)c1ccc(c(c1OC3)O)O)O
NPL	ST057253	1.05904	0.941541	CN[C@H]1[C@H](O)[C@H]2O[C@@H]3O[C@H](C)CC(=O)[C@@]3(O[C@@H]2[C@H]([C@H]1O)NC)O.Cl
NPL	ST005176	0.703082	0.981718	C/C(=C\COc1cc(=O)[nH]c2c1cccc2)/CCC(C(O)(C)C)O
NPL	ST012000	0.998987	0.958264	CC(CCCC(C1CCC2C1(C)CCC1C2CC=C2C1(C)CCC(C2)O)C)C
NPL	ST013879	1.03317	0.96262	CC(=O)OC1C(OC(=O)C)C(OC1n1ccc(=O)[nH]c1=O)COC(=O)C
NPL	ST023493	1.00603	0.798113	COc1cc(ccc1OC)CC1N(C)CCc2c1cc(OC)c(c2)OC
NPL	ST024707	0.985518	0.98111	O[C@@H](C(O)(C)C)COc1cc2oc(=O)ccc2cc1C
NPL	ST024734	0.933634	0.788679	COc1ccc(cc1OC(=O)C)c1oc2cc(OC)c(c(c2c(=O)c1OC)OC)OC(=O)C
NPL	ST031709	1.04055	1.02313	OCC1OC(C(C1O)O)NNC(=O)c1cccc(c1)OC
NPL	ST044511	1.08178	1.0194	CCn1nc(C(=O)O)c(=O)c2c1cc1OCOc1c2
NPL	ST055354	0.819543	0.952166	Oc1c(O)cc(c2c1C(=O)c1ccccc1C2=O)O
NPL	ST055650	1.28516	0.591099	Oc1ccc2c(c1)oc(c(c2=O)O)c1ccc(c(c1)O)O
NPL	ST056001	1.27984	1.01842	COc1cc2oc(cc(=O)c2cc1O)c1ccccc1
NPL	ST056220	1.01018	1.00161	CC(C(Cc1ccc(c(c1)O)O)C)Cc1ccc(c(c1)O)O
NPL	ST056294	2.5542	0.537253	CN1CCc2c3C1Cc1ccc(c(c1c3ccc2)O)O.O.Cl
NPL	ST056339	0.897175	0.842756	CC[C@]12CCCN3C2c2n(C(=O)C1)c1c(c2CC3)cccc1
NPL	ST056919	1.20407	1.08643	OCC1OC(CC1O)n1ccc(nc1=O)N.Cl
NPL	ST057077	1.09141	0.976644	OC[C@H]1O[C@H]([C@H]2[C@@H]1OC(O2)(C)C)n1cnc2c1ncnc2N
NPL	ST057095	1.31208	1.10169	OC[C@H]1O[C@H](C[C@@H]1O)n1cc(Br)c(=O)[nH]c1=O
NPL	ST057162	1.55803	1.15777	O[C@H]1CC[C@]2([C@H](C1(C)C)CC[C@@]1([C@@H]2CC=C2[C@@]1(C)CC[C@@]1([C@H]2CC(C)(C)CC1)C(=O)O)C)C
NPL	ST057212	1.07397	1.03295	CCCCCCCCCCCC1=C(O)C(=O)C=C(C1=O)O
NPL	ST057255	1.10008	0.995767	C=C1CCC2OC2(CCC2C1CC2(C)C)C
NPL	ST005178	0.742523	0.779274	COc1ccc2c(c1)c1OC(C)(C)C=Cc1c(=O)[nH]2
NPL	ST012797	0.974651	0.884002	OC1CCN2C1=Nc1ccccc1C2
NPL	ST013886	0.893542	0.839838	Oc1ccc2c(c1)CCC1C2CCC2(C1CCC2O)C
NPL	ST023509	0.82882	0.895265	O=c1ccc2c(o1)cccc2
NPL	ST024709	1.02563	0.985787	CC(=CCc1c(O)cc(c2c1O[C@@H](CC2=O)c1ccccc1)O)C
NPL	ST024752	1.03096	0.837611	COc1ccc2c(c1)[nH]c1c2CCN2C1CC1C(C2)CC(C(C1C(=O)OC)OC)OC(=O)c1cc(OC)c(c(c1)OC)OC
NPL	ST032738	1.3051	1.31783	O=C[C@@]12CC[C@@H](C[C@@]2(O)CC[C@@H]2[C@@H]1CC[C@]1([C@]2(O)CC[C@@H]1C1=CC(=O)OC1)C)O
NPL	ST044516	0.844104	0.86784	COc1c(C/C=C(/CCC(=O)O)\C)c(O)c2c(c1C)COC2=O
NPL	ST055355	0.57153	0.94727	Cc1cc(O)c2c(c1)C(=O)c1c(C2=O)c(O)cc(c1)O
NPL	ST055657	1.5135	0.898043	COc1c(oc2c(c1=O)ccc1c2cco1)c1ccccc1
NPL	ST056003	0.966442	0.646124	COc1ccccc1c1cc(=O)c2c(o1)cccc2
NPL	ST056222	1.02543	0.812166	COc1ccc2c(c1)c(c[nH]2)CC(C(=O)O)N
NPL	ST056295	1.00489	0.908945	COC1=CC2C3Cc4c(C2(CC1=O)CCN3C)c(O)c(cc4)OC
NPL	ST056340	1.17338	0.937375	CCC1CN2CCc3c([C@@H]2C[C@@H]1C[C@H]1NCCc2c1cc(OC)c(c2)OC)cc(c(c3)OC)OC
NPL	ST056920	1.09272	1.01398	OCC1OC(C(C1O)O)n1ccc(cc1=O)O
NPL	ST057079	1.22808	1.04765	OC[C@H]1O[C@H](C[C@@H]1O)n1cnc2c1ncnc2N
NPL	ST057096	1.54208	1.06502	OC[C@H]1O[C@H]([C@@H]([C@@H]1OP(=O)(O)O)O)n1ccc(nc1=O)N
NPL	ST057164	0.942057	0.772383	Oc1ccc(cc1)CCC(=O)c1c(O)cc(cc1O)O
NPL	ST057225	1.1189	0.90071	COc1c(OC)cc2c(c1OC)c1ccc(c(=O)cc1[C@H](CC2)NC(=O)C)O
NPL	ST057257	0.998299	0.874826	O=C1O[C@H]2CCN3C2C(=CC3)COC(=O)[C@]([C@@]([C@H]1C)(C)O)(C)O
NPL	ST005180	0.999718	0.950652	O[Cl](=O)(=O)=O.CCN1CC2(CC[C@@H]([C@]34[C@H]1[C@@](O)([C@H](C23)OC)[C@@]1(C2C4C[C@@H]([C@@H]2OC)[C@H](C1)OC)O)OC)COC(=O)c1ccccc1N1C(=O)CC(C1=O)C.CCO
NPL	ST012861	0.961435	1.03841	[Na]OCCN1CC2CC(C1)c1n(C2)c(=O)ccc1
NPL	ST014156	0.814668	0.865975	COc1cc(OC)ccc1C(=O)C1C2C3COC(O3)C(=O)C2C2N1c1ccccc1C=C2
NPL	ST023512	0.935472	1.0305	OC[C@H]1O[C@H]([C@@H]([C@@H]1O)O)n1ccc(=O)[nH]c1=O
NPL	ST024710	1.0921	1.04915	Oc1cc(O)c2c(c1)oc(c(c2=O)OC1OC(COC2OC(C)C(C(C2O)O)O)C(C(C1O)O)O)c1ccc(c(c1)O)O
NPL	ST024761	0.902574	0.976084	CCC(=O)O[C@@]1([C@@H](C)C[C@@H]2[C@]1(C)C[C@H](O)[C@]1([C@H]2CCC2=CC(=O)C=C[C@]12C)F)C(=O)COC(=O)CC
NPL	ST033520	0.886429	1.04738	O[C@@H]1CC[C@]2([C@@H](C1)C[C@H]([C@@H]1[C@@H]2CC[C@]2([C@H]1CC[C@@H]2[C@@H](CCC(=O)O)C)C)O)C
NPL	ST044517	1.04658	1.04993	OC(=O)[C@H]1O[C@@H](Oc2ccc3c(c2)oc(=O)cc3C)[C@@H]([C@H]([C@@H]1O)O)O
NPL	ST055359	1.06127	0.769008	O=c1cc(oc2c1ccc1c2cccc1)c1ccccc1
NPL	ST055658	1.11771	1.04518	Cc1ccc2c(c1)c(=O)c(c(o2)c1ccccc1)O
NPL	ST056004	1.12195	1.00536	COc1cccc2c1c(=O)cc(o2)c1ccc(cc1)O
NPL	ST056255	0.997962	0.923056	Oc1cc(C)c2c(c1)oc(cc2=O)c1ccccc1
NPL	ST056297	1.12011	0.905552	CCC1(O)C(=O)OCc2c1cc1c3nc4ccccc4cc3Cn1c2=O
NPL	ST056341	1.74976	1.03112	CC1C(=O)OC2C1CC[C@@]1(C2=C(C)C(=O)C=C1)C
NPL	ST056922	1.42938	1.10594	OC[C@@H]1OC([C@H]([C@H]1O)O)n1cnc2c1[nH]cnc2=O
NPL	ST057080	1.41264	0.980261	OC[C@H]1O[C@H]([C@@H]([C@@H]1O)O)n1c(Br)nc2c1ncnc2N
NPL	ST057097	11.9433	1.05061	O[C@@H]1[C@@H](COP(=O)(OP(=O)(O)[O-])O)O[C@H]([C@@H]1O)n1cnc2c1ncnc2N	AGONIST
NPL	ST057165	1.48552	0.934133	O=C1C=C2[C@@]3(O1)C[C@@H](C=C2)N1[C@@H]3CCCC1
NPL	ST057232	1.23636	0.980706	OC/C=C(/C=C/C=C(/C=C/C1=C(C)CCCC1(C)C)\C)\C
NPL	ST057258	1.13371	1.01857	OC(=O)CCC(C(=O)O)NC(=O)c1ccc(cc1)NCC1=Nc2c(NC1)[nH]c(nc2=O)N
NPL	ST007553	0.792506	0.835011	OCCc1sc[n+](c1C)Cc1cnc(nc1N)C.Cl.[Cl-]
NPL	ST012862	0.855902	0.874916	O=C1N(CCN2CC3CC(C2)c2n(C3)c(=O)ccc2)C(=O)c2c1cccc2
NPL	ST018409	1.07216	0.971797	OCC1CCCN2C1CCCC2
NPL	ST023754	1.07179	0.898397	COc1cc2C(C)NCCc2cc1O
NPL	ST024711	0.936017	0.952701	CNC1C2CN3C1C(O2)CC3
NPL	ST024766	0.927433	0.897125	OC(=O)CCC(C(=O)O)NC(=O)c1ccc(cc1)NCc1cnc2c(n1)c(=O)nc([nH]2)N
NPL	ST033522	1.03243	0.634307	OC[C@@H]1Oc2ccc(cc2O[C@H]1c1ccc(c(c1)OC)O)C1Oc2cc(O)cc(c2C(=O)[C@H]1O)O
NPL	ST044783	0.864349	0.917213	O=c1[nH]c2ccccc2c2c1C=CC(O2)(C)C
NPL	ST055364	1.11179	0.971681	Oc1ccccc1c1cc(=O)c2c(o1)cccc2
NPL	ST055756	1.35005	0.761187	COc1cc2CC[n+]3c(c2cc1OC)cc1c(c3)c(OC)c(cc1)OC.O.[Cl-]
NPL	ST056005	1.12814	0.914335	COc1ccc2c(c1)c(=O)cc(o2)c1ccc(cc1)O
NPL	ST056259	0.869544	0.676825	Oc1ccc2c(c1)oc(cc2=O)c1ccc(c(c1)O)O
NPL	ST056299	1.82557	0.884736	COc1cc2c(cc1OC)N1[C@@H]3[C@@]42CCN2[C@H]4C[C@@H]4[C@H]3[C@H](CC1=O)OCC=C4C2
NPL	ST056346	94.3413	0.644729	CS(=O)(=O)O.CN1C[C@@H](C[C@H]2[C@H]1Cc1c[nH]c3c1c2ccc3)C(=O)N[C@]1(C)O[C@@]2(N(C1=O)[C@@H](Cc1ccccc1)C(=O)N1[C@H]2CCC1)O	AGONIST
NPL	ST056923	2.00365	0.95575	OCC1OC(C(C1O)O)n1ccc(nc1=O)NN
NPL	ST057081	7.39887	1.01493	O[C@@H]1[C@@H](COP(=O)(OP(=O)(O)[O-])[O-])O[C@H]([C@@H]1O)n1cnc2c1ncnc2N	AGONIST
NPL	ST057098	1.6161	0.974286	OC[C@H]1O[C@H]([C@@H]([C@@H]1O)O)n1cnc2c1nc(N)[nH]c2=O
NPL	ST057166	1.0381	1.0126	CN([C@@H]1C(=C(C(=O)N)C(=O)[C@@]2([C@H]1C[C@H]1C(=C2O)C(=O)c2c([C@@]1(C)O)cccc2O)O)O)C.Cl
NPL	ST057234	1.0574	0.899948	C/C(=C/COc1c2ccoc2cc2c1ccc(=O)o2)/CCC=C(C)C
NPL	ST057259	0.923847	0.957018	COc1c2ccc(=O)oc2cc2c1cco2
NPL	ST007554	0.981841	0.876711	OCc1c(CO)cnc(c1O)C.Cl
NPL	ST012920	0.864675	0.906032	S=C=NCCCN1CC2CC(C1)c1n(C2)c(=O)ccc1
NPL	ST018508	1.01893	0.973143	OCC1OC(O)C(C(C1O)O)O
NPL	ST023755	0.776623	0.933551	COc1cc2C(C)NCCc2cc1OC
NPL	ST024712	0.998137	0.911273	OCC1OC(Oc2cc(O)c3c(c2)occ(c3=O)c2ccc(cc2)OC)C(C(C1O)O)O
NPL	ST024772	0.903659	0.914142	NC(c1ccccc1)C(=O)N[C@@H]1C(=O)N2[C@@H]1SC([C@@H]2C(=O)O)(C)C
NPL	ST036704	1.07829	0.940507	OC(=O)c1cc(O)c2c(n1)cccc2
NPL	ST047204	0.80211	0.793121	C/C=C(/C(=O)OC1c2c(ccc3c2oc(=O)cc3)OC(C1OC(=O)C)(C)C)\C
NPL	ST055366	1.04523	0.859155	COc1ccc(cc1)c1cc(=O)c2c(o1)cc(cc2)O
NPL	ST055757	1.07457	1.03852	COc1ccc2c(c1OC)C(=O)O[C@H]2[C@@H]1N(C)CCc2c1c(OC)c1c(c2)OCO1
NPL	ST056006	1.19348	1.0065	COc1ccc2c(c1)oc(cc2=O)c1ccc(cc1)O
NPL	ST056279	1.02127	1.03897	OC(=O)C1[C@@H](O)CC[C@@H]2[C@@H]1C[C@@H]1N(C2)CCc2c1[nH]c1c2cccc1.O
NPL	ST056301	1.10368	0.906776	Oc1ccc(cc1)c1cc(=O)c2c(o1)cc(cc2O)O
NPL	ST056348	2.28799	0.221135	O=C(OCc1ccccc1)NC[C@H]1CN(C)[C@H]2[C@H](C1)c1cccc3c1c(C2)cn3C	ANTAGONIST
NPL	ST056926	1.26726	1.10698	OCC1OC(C(C1O)O)n1cc(N)c(=O)[nH]c1=O
NPL	ST057082	1.22665	1.1067	OC[C@H]1O[C@H]([C@@H]([C@@H]1O)O)n1cnc2c1[nH]c(=O)[nH]c2=O
NPL	ST057126	1.72483	1.01454	C=CCNc1ncnc2c1ncn2C1OC(C(C1O)O)CO
NPL	ST057169	1.12876	0.345948	COc1ccc2c(c1O)c1c(OC)c(OC)cc3c1[C@H](C2)N(C)CC3
NPL	ST057235	0.903704	1.00354	Oc1cc(O)c2c(c1)oc(c(c2=O)O)c1cc(O)c(c(c1)O)O
NPL	ST057260	1.09543	1.00161	COc1ccc2c(c1)c(CCNC(=O)C)c[nH]2
NPL	ST008319	0.791375	0.81087	COc1ccc(cc1)C(=O)OC[C@H]1CCCN2C1CCCC2
NPL	ST012942	0.270335	0.4573	OCCN1CC2CC(C1)c1n(C2)c(=O)ccc1.Cl[Cu]Cl.O.O
NPL	ST019369	0.957881	0.878006	Oc1ccc2c(c1)[C@@]1(C)CCC[C@]([C@@H]1CC2)(C)C(=O)O
NPL	ST023799	0.774765	0.991146	CCCCCCCCCCCCCCCCCC(=O)O
NPL	ST024713	1.13	0.888139	COc1ccc(cc1)c1coc2c(c1=O)ccc(c2)O
NPL	ST024783	0.600977	0.849602	OCC(=C)C1Oc2c(C1)c1OC3COc4c(C3C(=O)c1cc2)cc(c(c4)OC)OC
NPL	ST036759	0.99576	0.684613	CN1CCc2cc3OCOc3cc2C(=O)Cc2c(C1)c1OCOc1cc2
NPL	ST047334	0.919762	0.730019	O=C1c2nc3ccccc3c(=O)n2c2c1cccc2
NPL	ST055367	0.925666	0.856971	COc1cc(ccc1O)c1cc(=O)c2c(o1)cccc2
NPL	ST055760	0.849863	0.944793	COc1c(OC)ccc2c1C(=O)O[C@@H]2[C@@H]1N(C)CCc2c1cc1OCOc1c2
NPL	ST056007	0.964734	0.913948	COc1cccc(c1)c1cc(=O)c2c(o1)cccc2
NPL	ST056281	1.09859	1.16275	NCC1(C)CCC[C@]2(C1CCc1c2ccc(c1)C(C)C)C
NPL	ST056302	1.35537	1.43093	OC[C@@]12[C@H](O)C[C@@H](C[C@@]2(O)CC[C@@H]2[C@@H]1[C@H](O)C[C@]1([C@]2(O)CC[C@@H]1C1=CC(=O)OC1)C)O[C@@H]1O[C@@H](C)[C@@H]([C@H]([C@H]1O)O)O.O
NPL	ST056349	0.972101	0.985575	COc1ccc2c3c1O[C@@H]1[C@]3(CCN(C2)C)C=C[C@@H](C1)O.Br
NPL	ST056929	1.08648	1.03108	OCC1OC(CC1O)n1cc(CC)c(=O)[nH]c1=O
NPL	ST057083	1.1905	1.03096	OC[C@H]1O[C@H]([C@@H]([C@@H]1O)O)n1cc(Br)c(=O)[nH]c1=O
NPL	ST057150	1.21719	0.991325	OC1CCC(=C)/C(=C/C=C/2\CCCC3(C2CCC3C(/C=C/C(C(C)C)C)C)C)/C1
NPL	ST057170	1.2404	0.987559	O[C@H](c1ccccc1)C[C@@H]1CCC[C@@H](N1C)CC(=O)c1ccccc1.Cl
NPL	ST057236	1.0011	0.936652	Oc1ccc(cc1)C1CC(=O)c2c(O1)cc(cc2O)O
NPL	ST057261	0.799277	0.919777	COc1cc2c(cc1OC)OC[C@@H]1[C@H]2C(=O)c2c(O1)c1C[C@@H](Oc1cc2)C(=C)C
NPL	ST057262	0.755476	0.848166	c1coc(c1)CNc1ncnc2c1[nH]cn2
NPL	ST057584	1.07287	0.783027	OCC1(C)C(O)CCC2(C1CCC(=C)C2C/C=C\1/C(O)COC1=O)C
NPL	ST057771	1.14449	0.900623	O=C1OC(=O)C2(C1(C)C1CCC2O1)C
NPL	ST059295	0.975875	0.573661	COc1cc2c(cc1OC)C[C@H]1c3c2c(OC)c(c(c3CCN1C)C=O)OC
NPL	ST060160	0.772322	0.987383	Oc1ccc(cc1)c1cc(=O)c2c(o1)cccc2
NPL	ST066907	1.0836	1.01007	CN([C@H]1CC[C@]2(C(=CC[C@@H]3[C@@H]2CC[C@]24[C@H]3CC[C@@H]4[C@@H](N(C2)C)C)C1)C)C
NPL	ST069303	1.07478	0.859015	C/C=C\1/CN2CC[C@@]34[C@@H]2C[C@@H]1C(=C3Nc1c4cccc1)C=O
NPL	ST069324	0.879759	0.905851	Oc1cc(O)c2c(c1)oc(cc2=O)c1ccccc1
NPL	ST069340	0.962218	0.961209	N[C@@H](C(=O)O)Cc1c[nH]cn1
NPL	ST072161	1.00752	0.997191	[O-]C(=O)c1[nH]c(=O)[nH]c(=O)c1[N+](=O)[O-]
NPL	ST073188	1.01202	1.0074	CCCCCCCC/C=C\CCCCCCCCN
NPL	ST075010	0.983405	0.981437	Oc1ccnc(n1)S
NPL	ST075190	1.27721	1.0117	O=C(c1ccccc1)Oc1ccc2c(c1)CC[C@@H]1[C@@H]2CC[C@]2([C@H]1CC[C@@H]2O)C
NPL	ST075697	1.08166	0.983017	N[C@@H]1CONC1=O
NPL	ST077127	1.02083	1.01433	OCC1OC(Oc2cccc3c2C(=O)c2c(C3=O)cc(cc2O)CO)C(C(C1O)O)O
NPL	ST079382	0.796664	0.34698	COc1cc(/C=C/C(=O)N2CCC=CC2=O)cc(c1OC)OC
NPL	ST082974	1.11621	1.05249	CN(Cc1c[nH]c2c1cccc2OCc1ccccc1)C
NPL	ST085490	1.2871	1.09674	OC(=O)CC(C(=O)O)NC(=O)N
NPL	ST086988	1.1803	1.04487	COc1ccc(cc1O)C(C(=O)O)O
NPL	ST092728	1.16933	0.957926	COc1ccc(cc1)CCC(=O)C
NPL	ST057263	0.578395	0.49493	OC[C@]1(C)[C@@H](O)[C@H](O)C[C@]2([C@H]1CC[C@@]1(C2CC=C2[C@@]1(C)CC[C@@]1([C@H]2[C@@H](C)[C@@H](CC1)C)C(=O)O)C)C
NPL	ST057601	0.842115	0.524384	COc1c(OC)cc2c3c1Oc1cc4c(cc1OC)CCN([C@H]4Cc1ccc(Oc4cc(C[C@H]3N(CC2)C)ccc4O)cc1)C.Cl.Cl
NPL	ST058119	0.919683	0.802703	IC[C@H]1O[C@H]([C@@H]([C@@H]1O)O)n1cnc2c1ncnc2N
NPL	ST059296	0.726526	0.167189	COc1cc2c(cc1OC)c(C=O)c1c3c2c(OC)c(OC)cc3CCN1C	ANTAGONIST
NPL	ST060214	0.924468	0.823266	COc1c(OC)ccc2c1oc(=O)cc2
NPL	ST066908	0.784216	0.808183	COc1ccc(cc1OC)CCN(CCCC(c1ccc(c(c1)OC)OC)(C(C)C)C#N)C.Cl
NPL	ST069304	0.562815	0.670809	C/C(=C\COc1c2occc2cc2c1oc(=O)cc2)/CCC=C(C)C
NPL	ST069325	0.684374	0.987629	OCCC(CCC=C(C)C)C
NPL	ST069342	1.18995	0.985538	O=C1CC[C@H](N1)C(=O)O
NPL	ST072162	0.889183	0.995289	OC[C@H]1O[C@@H](Oc2cc(O)c3c(c2)O[C@@H](CC3=O)c2ccc(cc2)O)[C@@H]([C@H]([C@@H]1O)O)O[C@@H]1O[C@@H](C)[C@@H]([C@H]([C@H]1O)O)O
NPL	ST073356	1.58314	0.939369	OC[C@H]1O[C@@H](Oc2ccc3c(c2)cccc3)[C@@H]([C@H]([C@H]1O)O)O
NPL	ST075158	0.856274	1.0969	CCCCCCCCCCCCCCCCO
NPL	ST075191	1.00335	0.865676	CCOC(=O)CCC(=O)OC1C(OC(CC1N(C)C)C)OC1C(C)C(OC2OC(C)C(C(C2)(C)OC)O)C(C)C(=O)OC(CC)C(C(C(C(=O)C(CC1(C)O)C)C)O)(C)O
NPL	ST075890	0.959619	0.932444	NC(=O)[C@@H]1CCCN1
NPL	ST077128	0.908171	0.852366	OCC1OC(Oc2cc(C)cc3c2C(=O)c2c(C3=O)cc(cc2O)O)C(C(C1O)O)O
NPL	ST079666	0.951891	1.07225	OC(=O)[C@H](CS(=O)(=O)O)N
NPL	ST083386	1.2789	1.00449	COc1c(O)ccc2c1nc1occc1c2OC
NPL	ST085498	1.23765	1.16072	NCCc1ncn(c1)C.Cl.Cl
NPL	ST087009	1.01751	1.5705	Cc1cc2c(C(C)C)c(O)c(c(c2c(c1c1c(C)cc2c(c1O)c(/C=N/NC(=O)c1ccoc1C)c(c(c2C(C)C)O)O)O)/C=N/NC(=O)c1ccoc1C)O
NPL	ST092729	1.12565	0.97724	OC(=O)C(CC(=O)O)CC(=O)O
NPL	ST057264	0.908239	0.800653	O=C1OC(=O)C2C1C1CCC2O1
NPL	ST057602	0.801847	0.029139	COc1c(OC)cc2c3c1Oc1cc4c(cc1OC)CCN([C@H]4Cc1ccc(Oc4cc(C[C@@H]3N(CC2)C)ccc4OC)cc1)C	ANTAGONIST
NPL	ST058120	1.09883	1.04624	O=C(OC(C)(C)C)N[C@H](C(=O)O)Cc1nc[nH]c1
NPL	ST059297	1.1869	0.668992	COc1cc2c(C(=O)c3ccccc3)c3N(C)CCc4c3c(c2cc1OC)c(OC)c(c4)OC
NPL	ST060215	0.900629	0.853004	COc1cc2c(CC)cc(=O)oc2cc1OC
NPL	ST066909	1.05753	0.862153	OC(=O)[C@H](c1cccc(c1)C(=O)c1ccccc1)C
NPL	ST069305	0.823602	1.11751	COc1cccc2c1C(=O)CC(O2)c1ccccc1
NPL	ST069326	0.879808	1.10232	C=CC(CCC=C(C)C)(O)C
NPL	ST069347	0.779723	0.933182	C/C=C/c1ccc2c(c1)OCO2
NPL	ST072163	1.04993	0.935316	OC(=O)C(Cc1c[nH]c2c1ccc(c2)F)N
NPL	ST073358	1.10254	1.08923	C[C@@H](CCC[C@]1(C)CCc2c(O1)c(C)c(c(c2C)O)C)CCC[C@@H](CCCC(C)C)C
NPL	ST075162	1.21209	1.13733	CC(CCCC(CCCC(C)C)C)CCC/C(=C/CC1=C(C)C(=O)c2c(C1=O)cccc2)/C
NPL	ST075193	0.853143	0.842877	OC(=O)CCC(=O)OCC(=O)[C@@]1(O)CC[C@@H]2[C@]1(C)C[C@H](O)[C@H]1[C@H]2CCC2=CC(=O)CC[C@]12C
NPL	ST076676	1.11455	0.645598	COc1c2c(=O)cc(oc2c(c2c1cco2)OC)C
NPL	ST077136	0.785172	0.0410928	CC(=O)OCC1OC(Oc2cc(OC(=O)C)c3c(c2)occ(c3=O)c2ccc(c(c2)OC(=O)C)OC(=O)C)C(C(C1OC(=O)C)OC(=O)C)OC(=O)C	ANTAGONIST
NPL	ST080603	1.2117	0.947098	Oc1ccc(cc1)C1CC(=O)c2c(O1)cccc2
NPL	ST083486	1.17519	1.07913	Cc1cc2c(o1)c(C)c1c(c2)c(C)cc(=O)o1
NPL	ST085652	1.33084	0.976329	O=C(N[C@@H](C(=O)O)CC(=O)N)OCc1ccccc1
NPL	ST087896	1.96286	1.36248	C/C(=C\COc1ccc2c(c1)oc(=O)cc2)/CC/C=C(/CCC=C(C)C)\C
NPL	ST092737	1.40325	1.06978	O[C@@H]1[C@H](C)O[C@@H]([C@H]([C@@H]1O)O)O
NPL	ST057336	1.14639	0.771984	OCCc1c([nH]c2c1cccc2)C1C[C@@H]2CCN1C[C@@H]2C=C
NPL	ST057604	0.473936	0.428838	Oc1cc(C)c(c(c1)O)c1c(N)cc2c(c1C)nc1c(o2)cc(=O)cc1C
NPL	ST058126	0.741886	0.762957	CN1C2CCC1CC(=O)C2
NPL	ST059301	0.824452	0.881332	O=C1CCCC2N1C[C@H]1CCCN3[C@H]1[C@H]2CCC3
NPL	ST060285	0.800898	0.736601	Oc1cc2OC(c3ccc(c(c3)O)O)C(C(=O)c2c(c1)O)O
NPL	ST066910	0.910918	0.759724	COC(=O)[C@@H]1C(O)CCC2C1CC1N(C2)CCc2c1[nH]c1c2cccc1.Cl.O
NPL	ST069307	1.13677	0.938588	COc1ccc(cc1)c1oc2cc(OC)ccc2c(=O)c1O
NPL	ST069327	0.866237	0.973225	OC[C@H]1O[C@@H](Oc2ccccc2CO)[C@@H]([C@H]([C@@H]1O)O)O
NPL	ST069348	0.856314	0.887852	Cc1ccc2c(c1)c(=O)cc(o2)c1ccccc1
NPL	ST072170	0.991895	1.00255	Oc1cc(O)c2c(c1)oc(c(c2=O)O[C@@H]1O[C@H](CO[C@@H]2O[C@@H](C)[C@@H]([C@H]([C@H]2O)O)O)[C@H]([C@@H]([C@H]1O)O)O)c1cccc(c1O)O
NPL	ST073359	1.09496	0.984576	OC(=O)CCCCC1SSCC1
NPL	ST075165	0.908777	0.977792	OC(=O)CC[C@H]([C@H]1CC[C@@H]2[C@]1(C)C(=O)C[C@H]1[C@H]2C(=O)C[C@H]2[C@]1(C)CCC(=O)C2)C
NPL	ST075194	1.11924	0.967443	CCCC(=O)O[C@@]1(CC[C@@H]2[C@]1(C)C[C@H](O)[C@H]1[C@H]2CCC2=CC(=O)CC[C@]12C)C(=O)CO
NPL	ST076677	0.98291	0.9596	Cc1c[nH]c(=O)nc1N
NPL	ST077142	1.35627	0.646662	COc1cc2ccc(=O)oc2cc1OC1OC(COC(=O)C)C(C(C1OC1OC(C)C(C(C1OC(=O)C)OC(=O)C)OC(=O)C)OC(=O)C)OC(=O)C
NPL	ST080681	1.12161	1.00515	OC[C@H]1O[C@@H](Oc2ccc3c(c2)ccc(c3)Br)[C@@H]([C@H]([C@H]1O)O)O
NPL	ST083487	1.30212	1.06146	OC(=O)c1cc(O)c(c(c1)O)O
NPL	ST085666	1.20825	0.803127	COc1cc(ccc1OC)C1CC(=O)c2c(O1)cccc2
NPL	ST087935	1.35404	1.10841	OCC1OC(OCC2OC(OC(=O)C34CCC(C(C4C4=CCC5C(C4(CC3)C)(C)CCC3C5(C)CC(C(C3(C)CO)O)O)C)C)C(C(C2O)O)O)C(C(C1OC1OC(C)C(C(C1O)O)O)O)O
NPL	ST092792	1.35751	1.00976	CC(=O)OC1CCC2(C(C1(C)C)CCC1(C2CCC2C1(C)CCC1(C2C(CC1)C(=C)C)C)C)C
NPL	ST057376	1.05883	0.869597	O=C(N[C@@H]1C(=O)N2[C@@H]1SCC(=C2C(=O)[O-])COC(=O)C)CSc1ccncc1.[Na+]
NPL	ST057637	1.79608	0.850125	COc1ccc2c(c1)oc(cc2=O)c1cc(OC)c(c(c1)OC)OC
NPL	ST058419	0.740826	1.37583	Cc1cc(O)cc(c1)O
NPL	ST059305	1.15042	1.08424	CC/C(=C(/c1ccc(cc1)O)\CC)/c1ccc(cc1)O
NPL	ST060441	0.865368	1.29335	COc1ccc2c(c1)oc(=O)cc2C
NPL	ST066911	1.04064	1.13125	CN[C@H]1[C@H](O)[C@H]2O[C@@H]3O[C@H](C)CC(=O)[C@@]3(O[C@@H]2[C@H]([C@H]1O)NC)O
NPL	ST069312	0.884593	1.39825	CC[C@@H](C(C)C)CC[C@H]([C@H]1CC[C@@H]2[C@]1(C)CC[C@H]1[C@H]2CC=C2[C@]1(C)CC[C@@H](C2)O)C
NPL	ST069328	1.00315	1.17837	CC(=C)[C@H]1CC=C(C(=O)C1)C
NPL	ST069355	0.103897	0.039349	CC1=CC(=O)c2c(C1=O)cccc2O
NPL	ST072172	1.25255	1.47369	OC/C=C(/CC/C=C(/CCC=C(C)C)\C)\C
NPL	ST073362	0.921356	1.40094	OCC(C(C1OC(O)(CC(C1NC(=O)C)O)C(=O)OC)O)O
NPL	ST075167	1.04953	1.11758	O[C@@H]1COC2C1OC[C@@H]2O
NPL	ST075195	0.801772	1.03331	CCCCC(=O)O[C@@]1(CC[C@@H]2[C@]1(C)C[C@H](O)[C@H]1[C@H]2CCC2=CC(=O)CC[C@]12C)C(=O)CO
NPL	ST077075	1.30334	1.0827	COc1cc2ccc(=O)oc2cc1OC1OC(COC2OC(C)C(C(C2O)O)O)C(C(C1O)O)O
NPL	ST077145	0.912465	0.841792	COc1ccc(cc1OC)Cc1nccc2c1cc(OC)c(c2)OC.Cl
NPL	ST080859	1.45037	1.092	COc1ccc(cc1)C(=O)O
NPL	ST083654	1.24891	1.06791	COc1cccc(c1)c1cc(=O)c2c(o1)cccc2O
NPL	ST085668	1.79473	1.71222	COc1ccc(cc1)c1oc2cc(O)cc(c2c(=O)c1O)O
NPL	ST087947	1.35403	0.499734	OCC(C(c1ccc(cc1)/N=C/c1c(O)c(O)c(c2c1c(O)c(c(c2)C)c1c(C)cc2c(c1O)c(/C=N/c1ccc(cc1)C(C(CO)O)O)c(c(c2C(C)C)O)O)C(C)C)O)O
NPL	ST093417	1.50994	0.975417	OC(=O)c1ccc(=O)[nH]c1
NPL	ST057515	0.683951	0.776974	Oc1ccc(cc1)c1coc2c(c1=O)ccc(c2)O
NPL	ST057642	0.829333	0.912183	COc1cc(O)c2c(c1)oc(cc2=O)c1ccc(cc1)O
NPL	ST058428	0.950515	1.44515	COC(=O)CCCC[C@@H]1SC[C@H]2[C@@H]1NC(=O)N2
NPL	ST059434	0.730183	0.966175	C=CC(CC/C=C(/CCC=C(C)C)\C)(O)C
NPL	ST061468	0.888467	1.33973	COc1cc(OC)c2c(c1)oc(=O)cc2C
NPL	ST066914	0.84639	0.96128	COc1cc(cc(c1OC)OC)[C@H]1[C@H]2C(=O)OC[C@@H]2[C@H](c2c1cc1OCOc1c2)O
NPL	ST069313	0.962268	1.46377	CC[C@@H](C(C)C)/C=C/[C@H]([C@H]1CC[C@@H]2[C@]1(C)CC[C@H]1[C@H]2CC=C2[C@]1(C)CC[C@@H](C2)O)C
NPL	ST069329	0.719714	0.656609	O=C1CC[C@]2(C(=C1)CC[C@@H]1[C@@H]2CC[C@]2([C@H]1CC[C@@H]2C(=O)C)C)C
NPL	ST069356	0.933045	1.60691	OC(C(=O)O)Cc1ccccc1
NPL	ST072176	0.862612	0.584402	O[C@H]1CC[C@]2([C@H](C1)CC[C@@H]1[C@@H]2CC[C@]2([C@H]1CCC2=O)C)C
NPL	ST073383	1.45864	1.38545	O[C@H]1CC[C@]2(C(=CC=C3[C@@H]2CC[C@]2([C@H]3CC[C@@H]2[C@@H](/C=C/[C@@H](C(C)C)C)C)C)C1)C
NPL	ST075172	0.835728	0.905618	OC[C@H]1[C@H](O)C[C@H]2[C@@H]1CC(=O)O2
NPL	ST075196	1.38602	1.08613	CCCCCC(=O)O[C@@]1(CC[C@@H]2[C@]1(C)CC[C@H]1[C@H]2CCC2=CC(=O)CC[C@]12C)C(=O)C
NPL	ST077078	1.30872	1.00035	COc1cc2ccc(=O)oc2cc1OC1OC(COC2OC(C)C(C(C2O)O)O)C(C(C1OC(=O)C)O)O
NPL	ST077156	1.30994	1.03892	OCC1OC(Oc2ccc3c(c2)OC(CC3=O)c2ccc(cc2)O)C(C(C1O)O)O
NPL	ST080860	1.23168	1.14461	COC(=O)C1=CO[C@H]([C@H]2[C@@H]1CC=C2CO)O
NPL	ST083655	1.61198	0.632986	COc1ccccc1c1cc(=O)c2c(o1)cccc2OC
NPL	ST085767	1.66323	1.6607	OC[C@@]12[C@H](O)C[C@@H](C[C@@]2(O)CC[C@@H]2[C@@H]1[C@H](O)C[C@]1([C@]2(O)CC[C@@H]1C1=CC(=O)OC1)C)O[C@@H]1O[C@@H](C)[C@@H]([C@H]([C@H]1O)O)O
NPL	ST088024	1.71074	1.04624	C/C(=C/C)/C(=O)O
NPL	ST093686	1.0972	0.836654	COc1cc(C=O)c(cc1OC)OC
NPL	ST057526	0.731543	0.802587	CN1CC[C@@]2([C@H]1N(C)c1c2cc(cc1)O)C
NPL	ST057644	1.03173	0.684234	COc1c(oc2c(c1=O)cccc2)c1cccc(c1)OC
NPL	ST058440	0.835296	1.36936	C=CCOc1ccc2c(c1)oc(=O)cc2
NPL	ST059435	0.977361	1.14083	OCC(C(=O)O)NC(=O)C(Cc1cnc[nH]1)N
NPL	ST065785	0.977554	1.43155	COc1ccc(cc1OC)C(=O)c1nccc2c1cc(OC)c(c2)OC
NPL	ST067106	0.862347	1.1658	CN([C@@H]1C(=C(C(=O)N)C(=O)[C@@]2([C@H]1[C@@H](O)[C@H]1C(=C2O)C(=O)c2c([C@@]1(C)O)cccc2O)O)O)C.Cl
NPL	ST069314	0.70238	1.53853	O=C(N[C@H](C(=O)NCC(=O)O)CSSC[C@@H](C(=O)NCC(=O)O)NC(=O)CC[C@@H](C(=O)O)N)CC[C@@H](C(=O)O)N
NPL	ST069330	0.936043	1.22287	CS(=O)CCC(C(=O)O)N
NPL	ST069360	0.827273	1.5298	COc1cccc2c1c(=O)cc(o2)c1ccccc1
NPL	ST072177	1.31939	1.30716	Cc1cc(O)c2c(c1)C(=O)c1c(C2=O)c(O)ccc1
NPL	ST073385	0.989109	1.5148	CSc1ncnc2c1[nH]cn2
NPL	ST075177	1.11947	1.27893	OC[C@H]1O[C@H]([C@@H]([C@@H]1O[C@H]1O[C@@H](CN)[C@H]([C@@H]([C@H]1N)O)O)O)O[C@@H]1[C@@H](O)[C@H](N)C[C@@H]([C@H]1O[C@H]1O[C@H](CN)[C@H]([C@@H]([C@H]1N)O)O)N
NPL	ST075197	6.36046	1.54022	OCC1OC(OC2C(C)OC(CC2OC(=O)C)OC2C(O)CC(OC2C)OC2C(O)CC(OC2C)OC2CCC3(C(C2)CCC2C3CC(O)C3(C2(O)CCC3C2=CC(=O)OC2)C)C)C(C(C1O)O)O
NPL	ST077079	1.54283	1.33303	COc1cc2ccc(=O)oc2cc1OC1OC(COC2OC(C)C(C(C2O)O)O)C(C(C1OC1OC(C)C(C(C1O)O)O)O)O
NPL	ST077157	1.22509	1.07112	C/C=C\1/C[N+]2(C)CCC34C2CC1C(=C3Nc1c4cccc1)C=O.[I-]
NPL	ST081028	1.21613	1.04653	OCC(=O)[C@@]1(O)CCC2C1(C)CCC1C2CCC2=CC(=O)CCC12C
NPL	ST083658	1.09522	1.04651	COc1cc(OC)c(c(c1)OC)C(=O)/C=C/c1ccc(c(c1)OC)O
NPL	ST085773	1.59267	1.16166	COc1ccc(cc1)c1oc2c(CC=C(C)C)c(O[C@@H]3O[C@H](CO)C([C@@H](C3O)O)O)cc(c2c(=O)c1OC1O[C@@H](C)[C@@H]([C@H]([C@H]1O)O)O)O
NPL	ST088130	1.09976	0.778701	CCOC(=O)C(CCCNC(=N)N)N.Cl
NPL	ST093688	1.23086	0.895957	COc1cc(cc(c1O)OC)C(=O)C
NPL	ST057527	0.977243	1.04759	C[C@H]1C[C@H](C)C(=O)[C@@H](C1)[C@@H](CC1CC(=O)NC(=O)C1)O
NPL	ST057655	0.763011	0.892884	O[C@@H]1C[C@H]2CC[C@@H](C1)N2C
NPL	ST058442	0.798821	1.2388	Cc1cccc(c1)c1cc(=O)c2c(o1)ccc(c2)C
NPL	ST059587	0.344667	0.806466	CC[C@@H]([C@@H](C(=O)O)NC(=O)OCC1c2ccccc2c2c1cccc2)C
NPL	ST065835	0.495943	1.27777	O=Cc1c(O)c(O)c(c2c1c(O)c(c(c2)C)c1c(C)cc2c(c1O)c(C=O)c(c(c2C(C)C)O)O)C(C)C
NPL	ST068812	0.858417	0.940412	O=C(OC(C(=O)O)Cc1ccc(c(c1)O)O)/C=C/c1ccc(c(c1)O)O
NPL	ST069315	0.739116	1.32772	COc1ccc2c(c1)[nH]c1c2ccnc1C
NPL	ST069331	0.814211	0.998086	OC[C@H]1O[C@@H](OC[C@H]2O[C@@H](O)[C@@H]([C@H]([C@@H]2O)O)O)[C@@H]([C@H]([C@@H]1O)O)O
NPL	ST069362	0.763568	1.62335	C1CC[C@@H]2N(C1)C[C@H]1C[C@@H]2CN2[C@@H]1CCCC2
NPL	ST072181	1.02417	1.24706	CC1=CCCC(=C)[C@@H]2[C@@H](CC1)C(C2)(C)C
NPL	ST073926	3.69277	1.45684	NCCc1cnc[nH]1
NPL	ST075179	0.898892	0.961883	CC(=O)OCC(=O)[C@@]1(O)CC[C@@H]2[C@]1(C)CC(=O)[C@H]1[C@H]2CCC2=CC(=O)CC[C@]12C
NPL	ST075200	1.36798	1.43407	O=C1CCC(N1)C(=O)NC(C(=O)N1CCCC1C(=O)N)Cc1[nH]cnc1
NPL	ST077087	1.06861	1.07442	COc1cc2ccc(=O)oc2cc1OC/C=C(\CO)/C
NPL	ST077165	1.44592	1.17773	COC(C(C(=O)OCC1=CCN2[C@H]1[C@@H](O)CC2)(C(C)C)O)C
NPL	ST081356	1.18206	1.10738	Oc1ccc(cc1)/C=C/C(=O)c1ccc(cc1O)O
NPL	ST083673	0.741455	0.397776	O=c1oc2c(cc1C(=O)OC(C)(C)C)cc1c3c2CCCN3CCC1
NPL	ST085774	1.55085	1.05448	O[C@H]1C=C2CCN3[C@H]2[C@@H]([C@@H]1O)c1cc2OCOc2cc1C3
NPL	ST088476	23.2211	0.938477	OCC1OC(C(C1O)O)n1cnc2c1nc(Cl)nc2N
NPL	ST093690	1.12019	0.772589	Cc1ccc(cc1)c1cc(=O)c2c(o1)cccc2
NPL	ST057528	0.758974	1.0355	Cn1cnc2c1c(=O)n(C)c(=O)n2C
NPL	ST057698	1.06683	0.995952	O=c1cccc2n1CC1CC2CN2[C@@H]1CCCC2
NPL	ST058458	0.600196	0.773429	Oc1cccc(c1)C1CC(=O)c2c(O1)cccc2
NPL	ST059591	0.895593	0.740799	Oc1ccc2c(c1)[nH]c1c2ccnc1C.O.Cl
NPL	ST066870	2.23912	1.51052	NCC(c1cccc(c1)O)O
NPL	ST068813	1.15794	1.51989	O=C(C(=O)O)Cc1ccccc1
NPL	ST069316	0.824866	1.50591	O[C@@H]1CC(=C[C@H]([C@H]1O)O)C(=O)O
NPL	ST069332	1.14654	1.24147	OC(=O)[C@@H](Cc1ccc(cc1)O)N
NPL	ST069364	0.977808	1.60138	Nc1ccn(c(=O)n1)[C@H]1CC[C@H](O1)CO
NPL	ST072185	29.8904	0.416691	O=C(C1CN(C)C2C(=C1)c1cccc3c1c(C2)c[nH]3)NC1(C)OC2(N(C1=O)C(Cc1ccccc1)C(=O)N1C2CCC1)O.OC(=O)C(C(C(=O)O)O)O	AGONIST
NPL	ST074037	1.03152	1.5865	Oc1ncc(c(n1)O)C(=O)O
NPL	ST075180	0.795402	1.1937	CC(=O)O[C@@]1(CC[C@@H]2[C@]1(C)CC[C@H]1[C@H]2C=C(C2=CC(=O)[C@H]3[C@@H]([C@]12C)C3)Cl)C(=O)C
NPL	ST075201	1.00206	1.34107	OC1C(OC2CCC3(C(=C2)CCC2C3CCC3(C2(O)CCC3c2ccc(=O)oc2)C)C)OC(C(C1O)O)C
NPL	ST077089	1.2413	0.9358	COc1cc(ccc1O)c1cc(=O)c2c(o1)cc(cc2O)O
NPL	ST077838	1.11861	0.894497	COc1ccc(cc1OC)CCNc1nc(Cl)nc(n1)N1CC2CC(C1)c1n(C2)c(=O)ccc1
NPL	ST081365	1.01825	0.637726	Oc1ccc2c(c1)CC=C1[C@@H]2CC[C@]2([C@H]1CCC2=O)C
NPL	ST083677	1.12154	0.976786	OCC1OC2C([C@@H]1O)Oc1n2ccc(=O)n1
NPL	ST085933	1.20361	1.15209	OC(=O)/C=C/c1c[nH]cn1
NPL	ST088590	1.25315	0.923108	OCCc1ccc(c(c1)O)O
NPL	ST093691	1.1656	1.01464	OC(=O)/C=C/c1ccc(cc1)O
NPL	ST057529	0.984595	0.964152	OC(=O)/C=C/c1ccc(c(c1)O)O
NPL	ST057699	0.684105	0.962503	O=CN1C[C@H]2C[C@@H](C1)c1n(C2)c(=O)ccc1
NPL	ST059080	0.900261	0.906879	Oc1ccccc1C1CC(=O)c2c(O1)cccc2
NPL	ST059592	0.679357	0.948745	OC(=O)[C@@H]1CCN1
NPL	ST066872	0.898517	1.48473	CC(=O)Nc1nc(O)c2c(n1)[nH]cn2
NPL	ST069274	0.901585	1.07551	COC1C(O)C(O)C(C(C1O)O)O
NPL	ST069317	0.91684	1.58018	NC(=O)NCCC[C@@H](C(=O)O)N
NPL	ST069333	0.825497	1.02954	O=C1C[C@H]2C([C@@]1(C)CC2)(C)C
NPL	ST069367	1.66413	1.71308	OC/C=C/c1cc(OC)c(c(c1)OC)O
NPL	ST072186	1.11067	1.41182	OCCCNC(=O)[C@@H](C(CO)(C)C)O
NPL	ST074561	0.872742	1.61064	c1coc(c1)CNc1ncnc2c1nc[nH]2.Cl
NPL	ST075181	0.503205	0.851532	O=C1CC[C@]2(C(=C1)C(=C[C@@H]1[C@@H]2CC[C@]2([C@H]1CC[C@]2(OC(=O)C)C(=O)C)C)Cl)C
NPL	ST075202	1.29061	1.09409	CC(=O)OCC(=O)[C@@]1(O)CC[C@@H]2[C@]1(C)C[C@H](O)[C@H]1[C@H]2CCC2=CC(=O)C=C[C@]12C
NPL	ST077094	0.998969	0.925859	OCC1OC(Oc2cc(O)c3c(c2)oc(cc3=O)c2ccc(c(c2)OC)O)C(C(C1O)O)O
NPL	ST078865	1.3808	0.845913	COc1cc(ccc1OC)c1oc2cc(O)ccc2c(=O)c1O
NPL	ST081388	1.21704	1.13883	Oc1ccc2c(c1)oc(=O)c(c2c1ccccc1)c1ccccc1Cl
NPL	ST083678	1.52553	1.09023	OCC1OC(CC1O)n1ccc(nc1=O)NC(=O)c1ccc(cc1)OC
NPL	ST086116	1.3934	1.18158	COc1ccc2c(c1)oc(c(c2=O)O)c1ccccc1
NPL	ST092297	1.41908	0.806785	COc1cc2oc(cc(=O)c2c(c1OC)OC)c1ccc(c(c1)O)OC
NPL	ST093694	1.10332	0.958539	COc1cc(C=O)cc(c1O)OC
NPL	ST057530	0.761206	0.05939	Nc1c2c(nc(n1)N1CCN(CC1)C(=O)c1ccco1)cc(c(c2)OC)OC.Cl	ANTAGONIST
NPL	ST057700	1.04335	0.976558	CC(=O)N1C[C@H]2C[C@@H](C1)c1n(C2)c(=O)ccc1
NPL	ST059082	0.851303	1.08209	Oc1cccc2c1c(=O)cc(o2)c1ccccc1
NPL	ST059597	0.968312	1.05526	NC(C(=O)O)Cc1c[nH]cn1.O.Cl
NPL	ST066876	0.890282	0.974557	OC[C@H]1O[C@H](C[C@@H]1O)n1cnc2c1nc(N)[nH]c2=O
NPL	ST069281	0.951876	0.983413	CC1CC[C@@H](C(C1)O)C(C)C
NPL	ST069318	1.00627	1.06038	C=CCc1ccc(c(c1)OC)O
NPL	ST069334	1.74943	1.427	O=C1OCC(=C1)[C@H]1CC[C@]2([C@]1(C)[C@H](O)C[C@H]1[C@H]2CC[C@H]2[C@]1(C)CC[C@@H](C2)O[C@H]1C[C@H](O)[C@@H]([C@H](O1)C)O[C@H]1C[C@H](O)[C@@H]([C@H](O1)C)O[C@H]1C[C@H](O)[C@@H]([C@H](O1)C)O)O
NPL	ST069368	60.6229	0.833816	CNC[C@@H](c1ccc(c(c1)O)O)O	UNKNOWN
NPL	ST072187	3.92994	1.36243	O=C1OCC(=C1)[C@H]1CC[C@]2([C@]1(C)CC[C@H]1[C@H]2CC[C@H]2[C@]1(C)CC[C@@H](C2)O[C@H]1C[C@H](O)[C@@H]([C@H](O1)C)O[C@H]1C[C@H](O)[C@@H]([C@H](O1)C)O[C@H]1C[C@H](O)[C@@H]([C@H](O1)C)O)O
NPL	ST074999	0.863954	0.968747	NC(C(=O)O)CC(C)C
NPL	ST075182	1.36539	1.22547	CCCC1CN(C(C1)C(=O)NC(C1OC(SC)C(C(C1O)O)OP(=O)(O)O)C(Cl)C)C
NPL	ST075203	0.843527	0.937397	CN([C@@H]1C(=C(C(=O)NCN2CCCC2)C(=O)[C@@]2([C@H]1C[C@H]1C(=C2O)C(=O)c2c([C@@]1(C)O)cccc2O)O)O)C
NPL	ST077105	1.85612	1.51148	OCC1OC(Oc2cc(O)c3c(c2)O[C@@H](CC3=O)c2ccc(cc2)O)C(C(C1O)O)OC(=O)/C=C/c1ccc(cc1)O
NPL	ST078877	4.83994	0.895046	O=c1[nH]c(=O)c2c(n1)n(CC(C(C(COP(=O)(OP(=O)(OC[C@H]1OC([C@@H]([C@@H]1O)O)n1cnc3c1ncnc3N)[O-])[O-])O)O)O)c1c(n2)cc(c(c1)C)C
NPL	ST081389	1.12531	1.00208	Oc1ccc(cc1)c1cc(=O)c2c(o1)cc(cc2)O
NPL	ST083679	1.07369	1.00421	OCC1OC(C(C1O)O)n1cc(C)c(nc1=O)N
NPL	ST086167	1.54378	1.24619	OC(=O)[C@@H](NC(=O)c1ccccc1)CCCNC(=N)N
NPL	ST092303	0.942002	0.888563	NC(C(=O)O)Cc1ccccc1
NPL	ST094769	1.04093	0.972353	COC(=O)/C=C/c1ccc(c(c1)O)O
NPL	ST057531	0.957093	0.795107	CO[C@H]1/C=C/O[C@@]2(C)Oc3c(C2=O)c2c(O)c(/C=N/N4CCN(CC4)C)c(c(c2c(c3C)O)O)NC(=O)/C(=C\C=C\[C@@H]([C@@H]([C@H]([C@H]([C@@H]([C@@H]([C@H]1C)OC(=O)C)C)O)C)O)C)/C
NPL	ST057702	0.646323	0.133046	COc1cc2c(cc1O)C[C@H]1c3c2c(O)c(OC)cc3CCN1C	UNKNOWN
NPL	ST059290	0.779818	0.933651	OCCC1(CO)CCC2(O1)C(C)CCC1[C@]2(C)CCC([C@@]1(C)CO)O
NPL	ST059599	0.786394	1.02444	O=Cc1c(CO)cnc(c1O)C
NPL	ST066877	1.06027	0.972595	CCSc1ncnc2c1[nH]cn2
NPL	ST069282	0.790649	0.958885	OC1C(O)CC(CC1O)(O)C(=O)O
NPL	ST069319	0.888807	1.02371	CC[C@@H]1C(=O)OC[C@@H]1Cc1cncn1C
NPL	ST069335	0.790354	1.02163	O[C@@H]1CC[C@]2([C@@H](C1)CC[C@@H]1[C@@H]2CC[C@]2([C@H]1CC[C@@H]2[C@@H](CCC(=O)O)C)C)C
NPL	ST069381	5.90156	0.737097	O[C@H]1CC[C@]2(C(=CC[C@@H]3[C@@H]2CC[C@]2([C@H]3CCC2=O)C)C1)C
NPL	ST072191	0.975269	1.06119	CC(CCCC1(C)CCc2c(O1)c(C)c(c(c2C)OC(=O)C)C)CCCC(CCCC(C)C)C
NPL	ST075000	0.925813	1.04546	OC(=O)CC[C@H](C(=O)O)N
NPL	ST075183	0.847046	1.02514	CC(=O)OCC(=O)[C@@]1(O)[C@H](C)C[C@@H]2[C@]1(C)C[C@H](O)[C@]1([C@H]2CCC2=CC(=O)C=C[C@]12C)F
NPL	ST075415	1.07575	1.04805	OC(=O)CC(C(=O)O)N
NPL	ST077108	0.999418	0.571117	COc1cc(ccc1O)c1oc2c(OC)c(O)cc(c2c(=O)c1O)O
NPL	ST079153	1.75883	1.0571	Oc1ccc2c(c1)OC(CC2=O)c1ccccc1
NPL	ST081626	1.38048	1.14477	Oc1cccc2c1c(=O)c(c(o2)c1ccccc1)O
NPL	ST083683	1.34462	1.25074	CC(Oc1ccc2c(c1)occ(c2=O)c1ccccc1)C
NPL	ST086485	1.35584	1.25751	COc1cc(ccc1O)C(=O)O
NPL	ST092341	1.25152	0.995229	COc1cc(CCC(=O)C)ccc1O
NPL	ST094897	1.20366	1.08273	COc1ccc(c(c1)O)C(=O)O
NPL	ST057540	5.39515	0.641369	OC[C@@H]1CN(C)C2C(=C1)c1cccc3c1c(C2)c[nH]3	AGONIST
NPL	ST057705	0.986288	1.01521	C/C=C\1/CC(=C)[C@@](C)(O)C(=O)OCC2=CCN3[C@H]2[C@H](OC1=O)CC3
NPL	ST059291	0.64774	0.469215	COc1cc2c(cc1OC)c(C)c1c3c2c(OC)c(OC)cc3CCN1C
NPL	ST059601	0.947099	0.980945	OC(=O)Cc1c[nH]c2c1cc(O)cc2
NPL	ST066880	0.813466	0.896884	OC(=O)c1c[nH]c2c1cccc2
NPL	ST069286	0.949193	1.0804	OCC(=O)[C@@]1(O)CC[C@@H]2[C@]1(C)C[C@H](O)[C@H]1[C@H]2CCC2=CC(=O)CC[C@]12C
NPL	ST069320	0.946315	1.00435	CN1CCC[C@H]1c1cccnc1
NPL	ST069336	0.858752	0.702329	Oc1cc2C[C@]3([C@@H](c2cc1O)c1ccc(c(c1OC3)O)O)O
NPL	ST069383	5.07691	0.830255	CCCCC/C=C\C/C=C\C/C=C\C/C=C\CCCC(=O)O
NPL	ST072192	0.939943	0.958265	CC/C=C\C/C=C\C/C=C\CCCCCCCC(=O)O
NPL	ST075001	0.896279	0.952435	OC(=O)CSC[C@@H](C(=O)O)N
NPL	ST075186	0.953859	1.03344	CC(=O)OCC(=O)[C@H]1CC[C@@H]2[C@]1(C)CC[C@H]1[C@H]2CCC2=CC(=O)CC[C@]12C
NPL	ST075419	1.11463	0.930251	NC(=S)NCCC[C@@H](C(=O)O)N
NPL	ST077114	1.31544	0.98605	OCC1OC(Oc2ccc3c(c2)occ(c3=O)c2ccc(cc2)O)C(C(C1O)O)O
NPL	ST079276	1.31401	1.04046	CC[C@@H]([C@@H](C(=O)O)N)C
NPL	ST082261	1.25134	1.16116	Cn1c(=O)[nH]c2c(c1=O)[nH]c(=O)n2C
NPL	ST085103	1.06668	0.934629	CN1CC[C@@]2([C@H]1C(C)c1c2cc(cc1)O)C
NPL	ST086489	1.25803	1.17323	OC(=O)c1cc(O)c2c(c1O)cccc2
NPL	ST092344	0.754995	0.969376	N[C@H](C(=O)O)CSC(c1ccccc1)(c1ccccc1)c1ccccc1
NPL	ST094906	1.33728	0.974808	CC(=C)C1CC=C(C(C1)O)C
NPL	ST057541	1.04138	1.00552	COc1cc(O)c2c(c1)oc(cc2=O)c1ccccc1
NPL	ST057707	0.748123	0.798238	COc1cc2C(=O)Cc3ccc4c(c3CN(CCc2cc1OC)C)OCO4
NPL	ST059292	0.876247	1.26778	COc1cc2c(cc1OC)c(Cc1c3N(C)CCc4c3c(c3c1ccc(c3OC)OC)c(c(c4)OC)OC)c1c3c2c(OC)c(cc3CCN1C)OC
NPL	ST059616	0.776088	0.895655	Oc1ccc2c(c1)c(=O)cc(o2)c1ccccc1O
NPL	ST066888	0.728309	1.0063	CN[C@H](C(=O)O)Cc1c[nH]c2c1cccc2
NPL	ST069297	0.68263	1.0638	C1CC[C@@H](NC1)c1cccnc1
NPL	ST069321	0.227677	0.106818	O[C@@H]%11[C@@H](O)[C@H](O)[C@H](O[C@H]%11O[C@@H]1[C@@H](O)[C@@H](O[C@H](CO)[C@@H]1O)O[C@@H]%10[C@@H](O[C@@H]2OC[C@@H](O)[C@H](O)[C@H]2O)C(O)[C@H](O[C@H]%10O[C@@H]3[C@H](O)[C@@H](O)[C@@H](O[C@@H]3CO)O[C@H]9[C@H](O)C[C@@]8(C)[C@@H](CC[C@@H]6[C@@H]8CC[C@@]7([C@@H]5[C@@H](O[C@@]4(OC[C@@H](CC4)C)[C@H]5C)[C@@H](O)[C@@H]67)C)C9)CO)CO
NPL	ST069337	0.765447	1.0445	Cn1cnc2c1c(=O)[nH]c(=O)n2C
NPL	ST070265	0.997435	1.09302	OC(=O)C1Cc2nc[nH]c2C=N1
NPL	ST072194	0.812233	1.06066	OC[C@H]1O[C@]([C@H]([C@@H]1O[C@@H]1O[C@H](CO)[C@@H]([C@@H]([C@H]1O)O)O)O)(O)CO
NPL	ST075002	1.11088	1.13211	OCC1(O)OC[C@@H]([C@H]([C@@H]1O)O)O
NPL	ST075187	1.06515	1.11133	OC1CCC(/C(=C/C=C/2\CCCC3(C2CCC3C(/C=C/C(C(C)C)C)C)C)/C1)C
NPL	ST075421	4.16727	1.0685	OC1C(COP(=O)(OP(=O)(OP(=O)(O)[O-])[O-])O)OC(C1O)n1cnc2c1ncnc2N
NPL	ST077119	0.93374	1.00044	COc1cccc2c1nc1occc1c2OC
NPL	ST079281	1.48971	1.13477	OC1C(COP(=O)(OP(=O)(OP(=O)(O)[O-])[O-])[O-])OC(C1O)n1ccc(=O)[nH]c1=O
NPL	ST082266	1.10961	1.16936	O=C1CC[C@]2(C(=C1)[C@@H](C)C[C@@H]1[C@@H]2[C@@H](O)C[C@]2([C@H]1CC[C@@H]2C(=O)C)C)C
NPL	ST085107	0.682927	0.667429	COc1ccc(cc1)C(c1ccc(cc1)OC)(c1ccccc1)OCC1OC(CC1O)n1cnc2c1[nH]c(NC(=O)C(C)C)nc2=O
NPL	ST086509	1.12211	1.18116	OC1C(O)C2COC(C1O)O2
NPL	ST092357	1.20507	0.912393	CCOC(=O)c1ccc(c(c1)OC)O
NPL	ST095172	1.29243	1.00129	COC(=O)C1=CCCN(C1)C
NPL	ST057559	0.781914	0.854672	CN1CCc2c([C@H]1[C@@H]1OC(=O)c3c1ccc1c3OCO1)cc1c(c2)OCO1
NPL	ST057729	1.09055	0.901595	Oc1cccc(c1)c1cc(=O)c2c(o1)ccc(c2)O
NPL	ST059293	0.847987	0.248178	COc1c(OC)ccc2c1C(Cc1ccccc1)N1C(=C2)c2cc3OCOc3cc2CC1	ANTAGONIST
NPL	ST059622	0.676181	0.817658	Oc1cc(ccc1O)c1oc2c(O)c(O)cc(c2c(=O)c1O)O
NPL	ST066889	0.682744	0.912189	COc1ccc(cc1)c1cc(=O)c2c(o1)cc(cc2O)O
NPL	ST069298	0.833712	0.221767	O=Cc1c2C(=O)C(=C(C(=O)c2c(c(c1O)O)C(C)C)C)C1=C(C)C(=O)c2c(C1=O)c(C=O)c(c(c2C(C)C)O)O	UNKNOWN
NPL	ST069322	0.702528	1.06037	CC1=CC(=O)C2CC1C2(C)C
NPL	ST069338	0.909778	1.13497	NC(=N)NCCC[C@H](C(=O)O)N
NPL	ST070634	0.926548	0.988965	OC[C@H]1O[C@@H](Oc2ccc(cc2)c2coc3c(c2=O)c(O)cc(c3)O)[C@@H]([C@H]([C@@H]1O)O)O
NPL	ST072637	0.872226	1.05008	CC(=O)N[C@@H](C(=O)O)Cc1ccc2c(c1)cccc2
NPL	ST075006	0.819815	0.993951	O=CC[C@H]1C[C@@H](C)[C@H](/C=C/C=C/C[C@H](OC(=O)C[C@H]([C@@H]([C@H]1OC1OC(C)C(C(C1O)N(C)C)OC1CC(C)(O)C(C(O1)C)O)OC)O)C)OC1CCC(C(O1)C)N(C)C
NPL	ST075188	1.00729	1.26935	CCCCC(=O)O[C@H]1CC[C@@H]2[C@]1(C)CC[C@H]1[C@H]2CCc2c1ccc(c2)O
NPL	ST075423	1.16618	1.30002	C[C@@H](CCC[C@]1(C)CCc2c(O1)c(C)c(c(c2C)OC(=O)CCC(=O)O)C)CCC[C@@H](CCCC(C)C)C
NPL	ST077121	0.895065	1.07689	OCC(C1Oc2c(C1)c1OC3COc4c(C3C(=O)c1cc2)cc(c(c4)OC)OC)(Cl)C
NPL	ST079379	1.30921	1.07942	O=c1ccc2c(o1)cc(c(c2)O)O
NPL	ST082267	0.936029	1.13744	O=C1CC[C@]2(C(=C1)[C@@H](C)C[C@@H]1[C@@H]2CC[C@]2([C@H]1CC[C@]2(O)C(=O)C)C)C
NPL	ST085108	0.958968	1.10193	O=C1NCCc2c1[nH]c1c2cccc1Cl
NPL	ST086622	1.16573	1.20791	O=c1c(O)c(oc2c1cccc2)c1ccccc1
NPL	ST092368	0.968618	1.03599	O=c1ccoc2c1cccc2
NPL	ST095175	1.17287	1.08547	OCCc1sc[n+](c1C)Cc1cnc(nc1N)C
NPL	ST057581	8.31356	0.467562	CC(C[C@H]1C(=O)N2CCC[C@H]2[C@]2(N1C(=O)[C@@](O2)(NC(=O)[C@H]1CN(C)[C@H]2C(=C1)c1cccc3c1c(C2)c[nH]3)C(C)C)O)C	AGONIST
NPL	ST057730	0.636261	0.978306	Oc1ccc(cc1)c1cc(=O)c2c(o1)cccc2O
NPL	ST059294	0.916285	0.553044	COc1c(OC)ccc2c1C(Cc1ccccc1)N1C(C2)c2cc3OCOc3cc2CC1
NPL	ST059837	0.787344	0.937318	Oc1ccc(c(c1)O)c1oc2cc(O)cc(c2c(=O)c1O)O.O.O
NPL	ST066906	0.72716	1.1064	O[C@@H]1C[C@]2(C)C([C@@]3(C1C(C)(C)[C@H](CC3)O)C)CC=C1[C@@]2(C)CC[C@@]2(C1CC(CC2)(C)C)C(=O)O
NPL	ST069302	0.712465	0.935987	C/C=C\1/C[N@+]2(C)CC[C@@]34[C@@H]2C[C@@H]1C(=C3Nc1c4cccc1)C=O.[Cl-]
NPL	ST069323	0.853095	1.27068	C=CC(CCCC(CCCC(CCCC(C)C)C)C)(O)C
NPL	ST069339	0.702915	0.816829	OC[C@H]1O[C@@H]([C@@H]([C@H]([C@@H]1O)O)O)c1c(O)c2c(c(c1O)O)C(=O)c1c(C2=O)c(C)c(c(c1)O)C(=O)O
NPL	ST070930	17.0489	1.00206	NCCc1cc2c([nH]1)ccc(c2)C.Cl	AGONIST
NPL	ST072640	0.646433	0.654175	Oc1ccc(cc1)/C=C/C(=O)c1ccccc1O
NPL	ST075007	0.976177	1.19194	O=CC[C@H]1C[C@@H](C)[C@@H](O)/C=C/C=C/C[C@H](OC(=O)C[C@H]([C@@H]([C@H]1O[C@@H]1O[C@H](C)[C@H]([C@@H]([C@H]1O)N(C)C)O[C@@H]1O[C@@H](C)[C@@H]([C@](C1)(C)O)OC(=O)CC(C)C)OC)OC(=O)C)C
NPL	ST075189	1.14061	1.9636	O=C(O[C@H]1CC[C@@H]2[C@]1(C)CC[C@H]1[C@H]2CCc2c1ccc(c2)O)CCC1CCCC1
NPL	ST075648	0.813703	1.0177	Oc1cc2OC(CC(=O)c2c(c1)O)c1ccc(c(c1)O)O
NPL	ST077125	0.82819	0.984089	OCC1OC(Oc2ccc3c(c2)OC[C@@H]2[C@H]3Oc3c2cc2c(c3)OCO2)C(C(C1O)O)O
NPL	ST079380	0.950913	0.937727	O=C(N1CCCCC1)/C=C/C=C/c1ccc2c(c1)OCO2
NPL	ST082973	1.21958	1.05871	CC(=O)O[C@H]1[C@H](C)OC=C[C@@H]1OC(=O)C
NPL	ST085110	0.973302	1.17422	CC(=C)[C@H]1CCC(=CC1)C(=O)O
NPL	ST086623	1.03852	1.19307	OC(=O)[C@H](Cc1ccc(c(c1)O)O)N
NPL	ST092709	0.941603	1.06253	COc1c(OC)cc(cc1OC)O
NPL	ST095409	1.03432	1.06933	OCC(C(C(C(C(=O)O)O)O)O[C@@H]1O[C@H](CO)[C@@H]([C@@H]([C@H]1O)O)O)O
NPL	ST095411	1.15528	0.72312	Oc1ccc(c(c1)O)C(=O)/C=C/c1ccccc1
NPL	ST097248	0.949719	1.00721	OC(=O)Cc1ccc(cc1)O
NPL	ST097617	1.52543	1.04397	C=CCc1cc(OC)c2c(c1OC)OCO2
NPL	ST098642	0.928829	1.06035	Nc1[nH]c(=O)c2c(n1)[nH]cn2
NPL	ST098725	1.1751	1.07984	C[NH+]1CC(=CCC1)C(=O)O.[Cl-]
NPL	ST099025	1.18147	1.16214	NCC(=O)N[C@H](C(=O)O)C(C)C
NPL	ST104237	1.23087	0.970603	OC1CCC2(C(C1)CCC1C2CC(O)C2(C1CCC2C(CCC(=O)NCCS(=O)(=O)[O-])C)C)C
NPL	ST024694	1.06851	1.17828	C1CCC2N(C1)CC1CC2CN2[C@@H]1CCCC2.I
NPL	ST057583	1.35925	1.10284	OC/C(=C/CNc1ncnc2c1[nH]cn2)/C
NPL	ST083652	1.10836	1.10872	COc1cc(O)c(c(c1)OC)C(=O)/C=C/c1cc(OC)c(cc1OC)OC
NPL	ST095414	0.57837	0.37383	Oc1ccccc1/C=C/C(=O)c1ccccc1O
NPL	ST097250	0.931762	1.04019	OC(=O)C(Cc1ccc(cc1)O)O
NPL	ST097622	1.01779	0.875486	COc1cc(cc(c1OC)OC)C(=O)O
NPL	ST098646	1.03976	1.08755	O=Cc1c[nH]c2c1cccc2
NPL	ST098727	1.13721	1.06035	C[C@@H]1CCO[C@H](C1)C=C(C)C
NPL	ST099026	1.00813	1.06959	NCC(=O)NCC(=O)O
NPL	ST104244	1.27734	1.28541	OC1CCC2(C(C1)CCC1C2CCC2(C1(O)CC(C2C1=CC(=O)OC1)O)C)C
NPL	ST024702	1.2543	0.685253	CC(=O)Oc1cc(OC(=O)C)c2c(c1)oc(c(c2=O)OC1OC(COC2OC(C)C(C(C2OC(=O)C)OC(=O)C)OC(=O)C)C(C(C1OC(=O)C)OC(=O)C)OC(=O)C)c1ccc(c(c1)OC(=O)C)OC(=O)C
NPL	ST057635	1.18006	0.856907	COc1ccc2c(c1)c(=O)c(c(o2)c1ccc(c(c1)OC)OC)OC
NPL	ST088115	1.1958	0.986702	OCC(C(C(C(C(CC(=O)C(=O)O)O)NC(=O)C)O)O)O
NPL	ST095415	1.48223	1.07612	OC[C@H]1OC([C@@H]([C@H]([C@@H]1O)O)O)c1c(O)cc2c(c1O)c(=O)c1c(o2)cc(c(c1)O)O
NPL	ST097427	1.10559	1.02669	c1ncc2c(n1)nc[nH]2
NPL	ST097623	1.37749	1.04145	OC(=O)c1ccc2c(c1)OCO2
NPL	ST098691	1.10653	0.97686	O=C(NCCc1ccccc1)NCCc1ccccc1
NPL	ST098731	0.874214	0.870787	Cc1cc2c(cc1C(=C)c1ccc(cc1)C(=O)O)C(C)(C)CCC2(C)C
NPL	ST099027	1.25393	1.03481	NCC(=O)NCC(=O)NCC(=O)O
NPL	ST104474	1.1837	0.98431	O=C1c2ccccc2N/C/1=C\1/Nc2c(C1=O)cccc2
NPL	ST024790	1.1566	0.916924	N#Cc1c(OC)ccn(c1=O)C
NPL	ST057726	0.982432	0.931103	Oc1cc(cc2c1C(=O)c1c(C2=O)cccc1O)C(=O)O
NPL	ST088474	1.80976	1.06772	CSCC1OC(C(C1O)O)n1cnc2c1ncnc2N
NPL	ST095417	1.02094	0.44578	Oc1ccc(c(c1)O)C(=O)/C=C/c1ccccc1O
NPL	ST097428	1.33363	1.02979	Oc1cc(O)c2c(c1)O[C@@H]([C@@H](C2)OC(=O)c1cc(O)c(c(c1)O)O)c1cc(O)c(c(c1)O)O
NPL	ST097624	0.925883	0.825864	OC1C[C@H]2C(C1(C)CC2)(C)C
NPL	ST098710	1.07263	0.867667	COc1cc(/C=C/C(=O)O)cc(c1O)OC
NPL	ST098733	0.831719	0.282431	CO[C@@H]1C[C@@H](CC[C@H]1O)C[C@@H]([C@H]1OC(=O)[C@@H]2CCCCN2C(=O)C(=O)[C@]2(O)O[C@@H](CC[C@H]2C)CC(OC)/C(=C/C=C/C=C/[C@H](C[C@H](C(=O)[C@@H]([C@@H](/C(=C/[C@H](C(=O)C1)C)/C)O)OC)C)C)/C)C	ANTAGONIST
NPL	ST099028	1.05117	0.938243	NCC(=O)NC(C(=O)O)Cc1cnc[nH]1
NPL	ST104478	1.17797	0.842092	O=C1C2(C)CCC(C1(C)C)C2
NPL	ST056012	0.880271	0.758212	Oc1ccccc1c1cc(=O)c2c(o1)c(O)c(cc2)O
NPL	ST058121	1.32636	0.856788	C=CC1C[N+]2(CCC1CC2[C@@H](c1ccnc2c1cc(OC)cc2)O)Cc1ccccc1.[Cl-]
NPL	ST094210	1.07118	0.993443	O=c1[nH]c(=O)[nH]c(c1)C(=O)O
NPL	ST095421	1.46707	1.30897	COc1ccc(cc1)c1coc2c(c1=O)cc(c(c2)O)OC
NPL	ST097455	1.39098	1.04834	OC(=O)/C=C/c1ccccc1
NPL	ST097625	1.60497	1.33698	COc1cc(/C=C/C(=O)O)ccc1O
NPL	ST098711	1.16998	0.905785	COc1cc(OC)cc(c1C(=O)C)O
NPL	ST098734	1.5273	0.687209	C/C=C/C[C@H]([C@H](C1C(=O)NC(CC)C(=O)N(C)CC(=O)N(C)C(CC(C)C)C(=O)NC(C(C)C)C(=O)N(C)C(CC(C)C)C(=O)NC(C(=O)N[C@@H](C(=O)N(C(C(=O)N(C(C(=O)N(C(C(=O)N1C)C(C)C)C)CC(C)C)C)CC(C)C)C)C)C)O)C
NPL	ST099029	1.16602	1.00402	NC(C(=O)NCC(=O)O)Cc1cnc[nH]1
NPL	ST104684	1.16672	0.888859	CC(=O)OC12COC1CC(C1(C2C(OC(=O)c2ccccc2)C2(O)CC(O)C(=C(C2(C)C)C(C1=O)O)C)C)O
NPL	ST056292	1.35817	0.974241	O=C1OC2OC3(C)CCC4C2(C(C1C)CCC4C)OO3
NPL	ST066913	1.2971	1.15758	CCC(C(=O)O[C@H]1C[C@@H](C)C=C2[C@H]1[C@@H](CC[C@@H]1C[C@@H](O)CC(=O)O1)[C@H](C=C2)C)C
NPL	ST101401	1.14501	0.937993	Oc1cc(O)c2c(c1)oc(c(c2=O)O[C@@H]1OC(C)[C@@H]([C@@H](C1O)O)O)c1ccc(c(c1)O)O
NPL	ST095769	5.52511	0.873651	CNCC(c1ccc(cc1)O)O
NPL	ST097456	0.887975	1.00354	COc1cc(/C=C/C(=O)O)ccc1OC
NPL	ST097626	0.818571	0.714733	COC1=CC(=O)OC(C1)/C=C/c1ccccc1
NPL	ST098712	0.876732	0.931365	CCOC(=O)c1cc(O)c(c(c1)O)O
NPL	ST098735	1.0281	0.811532	CC(=O)O[C@@H]1C[C@@H]2C([C@]1(C)CC2)(C)C
NPL	ST099038	0.9394	0.908564	COc1ccc(cc1O)c1oc2cc(O)cc(c2c(=O)c1O)O
NPL	ST104699	0.855396	0.805205	COc1cc(ccc1OC)C(=O)O
NPL	ST056353	1.03206	1.07121	COc1cc(cc(c1O)OC)[C@H]1[C@H]2C(=O)OCC2C(c2c1cc1OCOc1c2)OC1OC2COC(OC2C(C1O)O)C
NPL	ST069311	1.24435	0.900191	N[C@H](CO)Cc1c[nH]cn1
NPL	ST102488	6.23726	1.0444	CS(=O)(=O)O.CCCN1C[C@H](CSC)C[C@H]2[C@H]1Cc1c[nH]c3c1c2ccc3	AGONIST
NPL	ST095786	95.4625	0.822439	C=C[C@@]1(C)CC(=O)[C@]2([C@@](O1)(C)[C@@H](OC(=O)C)[C@H](C1[C@]2(C)[C@@H](O)CCC1(C)C)O)O	UNKNOWN
NPL	ST097458	2.03991	1.09548	Oc1ccc(c(c1)O)C(=O)O
NPL	ST097774	1.04588	1.01915	C/C(=C\C=C\C=C(\C=C\C=C(\C=C\C1=C(C)CCCC1(C)C)/C)/C)/C=C/C=C(/C=C/C1=C(C)CCCC1(C)C)\C
NPL	ST098713	1.28492	1.09474	CC(=CCCC(C1CCC(=CC1)C)(O)C)C
NPL	ST098736	1.3337	1.28323	COc1ccc(cc1)CCC(=O)O
NPL	ST099039	1.1506	0.955064	COc1ccc(cc1O)c1cc(=O)c2c(o1)cc(cc2O)OC1OC(COC2OC(C)[C@@H]([C@@H]([C@@H]2O)O)O)[C@@H]([C@H]([C@@H]1O)O)O
NPL	ST104720	1.13314	1.10559	OCC1OC(Oc2ccc3c(c2)occ(c3=O)c2ccc(cc2)OC)C(C(C1O)O)O
NPL	ST056354	1.41812	0.897658	O[C@@H]1C[C@@H]2C(C1)/C=C/CCC[C@@H](OC(=O)/C=C/[C@H]2O)C
NPL	ST073361	1.21868	1.36528	OC1C(OCC(C1O)O)NC1OCC(C(C1O)O)O
NPL	ST104643	1.06511	1.06183	CO[C@H]1O[C@H](C)[C@H]([C@@H]([C@@H]1O)O)O
NPL	ST095788	1.50246	0.461275	Oc1ccc(cc1)C(=O)/C=C/c1ccccc1
NPL	ST097540	0.950157	1.09265	OC(=O)c1cccnc1
NPL	ST097775	0.766069	0.715211	C[C@@H]1CC[C@@]2(OC1)O[C@@H]1[C@H]([C@@H]2C)[C@@]2([C@@H](C1)[C@@H]1CC=C3[C@]([C@H]1CC2)(C)CC[C@@H](C3)O)C
NPL	ST098714	0.721738	0.766934	CC(c1ccc(c2c(c1)c(C)cc2)C)C
NPL	ST098737	0.873356	0.804119	COc1cc(cc(c1O)OC)C(=O)O
NPL	ST099040	0.733653	0.754498	Oc1ccc2c(c1)oc(c(c2=O)O)c1cc(O)c(c(c1)O)O
NPL	ST104725	0.952288	0.865099	c1ccc2c(c1)c(c[nH]2)Cc1c[nH]c2c1cccc2
NPL	ST056913	0.90174	1.15251	OCC1OC(OC2OC(CO)C(C(C2O)O)O)C(C(C1O)O)O.O
NPL	ST075008	0.809872	0.697726	OC[C@H]1O[C@@H](Oc2cccc3c2C(=O)c2c([C@@H]3[C@@H]3c4cc(cc(c4C(=O)c4c3cccc4O[C@@H]3O[C@H](CO)[C@H]([C@@H]([C@H]3O)O)O)O)C(=O)O)cc(cc2O)C(=O)O)[C@@H]([C@H]([C@@H]1O)O)O
NPL	ST105439	0.892336	1.25507	O=C(OC(C)(C)C)CC[C@@H](C(=O)O)NC(=O)OC(C)(C)C
NPL	ST095848	1.01743	1.11193	Cn1cnc2c(c1N)ncn2
NPL	ST097541	0.807537	0.836972	OC(=O)CCc1ccccc1
NPL	ST097776	1.19636	1.2117	OC[C@@]12CC[C@H]([C@@H]([C@H]2C2=CC[C@H]3[C@@]([C@@]2(CC1)C)(C)CC[C@@H]1[C@]3(C)CC[C@@H](C1(C)C)O)C)C
NPL	ST098715	1.25256	1.00642	COc1cc(CC=C)cc(c1O)OC
NPL	ST098738	1.11739	1.17981	OC/C=C/c1ccc(c(c1)OC)O
NPL	ST099041	0.990604	0.906161	OCC1OC(Oc2cc3O[C@@H](CC(=O)c3c(c2)O)c2ccc(cc2)O)[C@H]([C@@H]([C@H]1O)O)O
NPL	ST104897	1.16521	1.03841	CN(CCc1ccc(cc1)O)C
NPL	ST056932	1.33502	0.977874	COC1C(O)C(OC1n1ccc(nc1=O)N)CO
NPL	ST077770	1.20974	0.834325	OC(=O)C(Cc1cc(I)c(c(c1)I)Oc1ccc(c(c1)I)O)N
NPL	ST105442	1.03986	0.860835	OC(=O)[C@H]1[C@H]2[C@]3([C@H]4[C@]51CC(=C)[C@](C5)(O)CC4)CC[C@@H]([C@]2(C)C(=O)O3)O
NPL	ST095851	0.623518	0.550367	COc1ccc(cc1)/C=C/C(=O)c1ccc(cc1)OC
NPL	ST097542	0.629344	0.281095	COc1c(OC)cc(cc1OC)c1cc(=O)c2c(o1)c(OC)c(c(c2O)OC)OC	ANTAGONIST
NPL	ST097777	0.736891	0.742686	SC[C@@H](C(=O)NCC(=O)O)NC(=O)CC[C@@H](C(=O)O)N
NPL	ST098716	0.884547	1.18187	CCCCCCCC/C=C/CCCCCCCC(=O)O
NPL	ST098835	0.683207	0.446276	Oc1ccc2c(c1)oc(cc2=O)c1cc(O)c(c(c1)O)O
NPL	ST100022	0.897869	1.10112	O=C1CCc2c(O1)cccc2
NPL	ST104899	1.16419	0.840146	COc1ccc(c(c1)O)C(=O)C
NPL	ST057175	0.825985	1.17673	COc1ccc(cc1)CC1NC[C@@H]([C@H]1OC(=O)C)O
NPL	ST078855	0.649581	0.57465	[N-]=[N+]=CC(=O)CCC(C(=O)O)N
NPL	ST105446	0.823345	0.980697	OC[C@H]1O[C@]([C@H]([C@@H]1O)O)(O)CO
NPL	ST096004	1.1025	0.954741	C[C@]12CCC(CC1)C(O2)(C)C
NPL	ST097546	1.24737	0.334456	COc1ccc(cc1)c1cc(=O)c2c(o1)c(OC)c(c(c2OC)OC)OC
NPL	ST097861	1.07057	0.813633	NCC(CCC(C(=O)O)N)O.Cl
NPL	ST098717	1.05373	0.809836	CC(=CCC/C(=C\1/CCC(=CC1)C)/C)C
NPL	ST098837	0.982542	0.945541	CC(C(C1CNc2c(N1)c(=O)nc([nH]2)N)O)O
NPL	ST102856	0.960115	0.994833	CSCCC(C(=O)NC(C(=O)NC(C(=O)O)Cc1ccccc1)CC(C)C)NC=O
NPL	ST105069	1.03168	0.983444	OC(=O)[C@H](CCSC[C@H]1O[C@H]([C@@H]([C@@H]1O)O)n1cnc2c1ncnc2N)N
NPL	ST057182	1.14566	0.978546	C[N]1=Cc2c(CC1)cc1c(c2)OCO1.Cl
NPL	ST078857	0.960417	0.921354	COC1C(OC(=O)N)C(O)C(OC1(C)C)Oc1ccc2c(c1C)oc(=O)c(c2[O-])NC(=O)c1ccc(c(c1)CC=C(C)C)O
NPL	ST105566	0.968347	0.982572	Oc1ccc2c(c1)oc(=O)c1c2oc2c1ccc(c2)O
NPL	ST096089	0.595714	0.74151	CC1=CCC(CC1)(O)C(C)C
NPL	ST097606	0.906864	0.871336	O=c1ccc2c(o1)cc1c(c2)CC(O1)C(O)(C)C
NPL	ST097866	0.503106	0.480974	O=C1C[C@H](C)[C@@]2(C(=C1)CC[C@@H](C2)C(=C)C)C
NPL	ST098719	0.893669	0.900024	OCC1O[C@@H](Oc2ccc(cc2)O)C([C@@H]([C@H]1O)O)O
NPL	ST098942	0.444554	0.556696	O=C1CC(Oc2c1cccc2)c1ccccc1
NPL	ST102880	0.849643	0.9449	OCC(c1ccccc1)C(=O)OC1CC2C3C(C(C1)[N+]2(C)C)O3.[Br-]
NPL	ST105082	0.46719	0.125623	CC1=CCC2C(C1COc1ccc3c(c1)oc(=O)cc3)(C)CCC(=O)C2(C)C	ANTAGONIST
NPL	ST057228	1.00314	1.08762	N[C@H](c1ccccc1)C(=O)N[C@@H]1C(=O)N2[C@@H]1SCC(=C2C(=O)O)Cl
NPL	ST079280	5.3317	0.745019	[O-]C1C(COP(=O)(OP(=O)([O-])[O-])[O-])OC(C1[O-])n1cnc2c1ncnc2N	AGONIST
NPL	ST105570	0.778544	0.825747	OC(=O)[C@H](Cc1ccc2c(c1)cccc2)N
NPL	ST096792	0.934293	0.967922	CCC/C=C/1\OC(=O)c2c1cccc2
NPL	ST097611	0.732426	0.0414028	COc1cc2CCN3C(c2cc1OC)Cc1c(C3)c(OC)c(cc1)OC	ANTAGONIST
NPL	ST098360	0.912673	0.933398	COc1ccc(cc1)C1CC(=O)c2c(O1)cc(cc2O)O
NPL	ST098720	1.26615	0.961416	COc1ccc(cc1)/C=C/C(=O)O
NPL	ST098994	0.956385	0.665536	Oc1ccc2c(c1)occ(c2=O)c1ccc(c(c1)O)O
NPL	ST102881	1.20832	0.994665	O=CC1=CC[C@@H]2C[C@H]1C2(C)C
NPL	ST105095	1.11065	0.931939	CC(=CCc1c2ccc(=O)oc2c(c2c1cco2)O)C
NPL	ST057249	0.815913	0.569995	CC1=CCCC2(C)OC2[C@@H]2[C@@H](CC1)C(=C)C(=O)O2
NPL	ST081390	1.09168	0.867331	CC(=O)O[C@@H]1C[C@@]2(C)[C@H]([C@H]3[C@H]1[C@@]1(C)CCC(=O)C=C1CC3)CC[C@@H]2C(=O)C
NPL	ST105571	1.47105	1.11548	O[C@@H]1[C@H](O)[C@H](O[C@H]1[n+]1cccc(c1)C(=O)N)COP(=O)(OP(=O)(OC[C@H]1O[C@H]([C@@H]([C@@H]1O)OP(=O)(O)O)n1cnc2c1ncnc2N)[O-])[O-].[Na+]
NPL	ST096801	0.654957	0.718006	CC/C=C\CC1[C@H](CCC1=O)CC(=O)OC
NPL	ST097613	0.82338	0.772161	C=CCc1cc2OCOc2c(c1OC)OC
NPL	ST098573	0.684243	0.732818	c1ccc2c(c1)[nH]c1c2cccc1
NPL	ST098721	0.881655	1.00534	COc1ccc(cc1O)/C=C/C(=O)O
NPL	ST098995	0.732187	0.544208	COc1ccc(cc1)c1cc(=O)c2c(o1)cc(cc2OC)OC
NPL	ST103933	0.912562	0.933107	O=c1[nH]c(=O)c2c([nH]1)[nH]cn2
NPL	ST105096	0.672589	0.655167	COc1c2c(CCN(C2O)C)cc2c1OCO2
NPL	ST057520	0.850464	0.878035	Cc1c2OC(C)(CCc2c(c(c1C)O)C)C(=O)O
NPL	ST081391	0.761735	0.817642	OCC1OC(C(C(C1O)O)O)c1c(O)ccc2c1occ(c2=O)c1ccc(cc1)O
NPL	ST105572	0.914561	1.08378	OC[C@H]1O[C@H](O)[C@@H]([C@H]([C@@H]1O)O)O[C@@H]1O[C@H](CO)[C@H]([C@@H]([C@H]1O)O)O
NPL	ST096993	0.955946	0.931112	COc1cc2oc(=O)ccc2cc1O
NPL	ST097615	0.967405	0.889356	COc1cc2ccc(=O)oc2c2c1occ2
NPL	ST098591	0.911081	0.753213	C/C(=C\C=C\C(=O)C)/CCC=C(C)C
NPL	ST098722	0.757869	0.889025	COc1cccc(c1C(=O)O)OC
NPL	ST099015	1.05455	0.77556	COc1ccc2c(c1)oc(cc2=O)c1ccc(c(c1)OC)OC
NPL	ST104233	0.99608	0.950597	OC1CCC2(C(C1)CC(C1C2CC(O)C2(C1CCC2C(CCC(=O)NCC(=O)[O-])C)C)O)C
NPL	ST023798	1.1073	0.932453	CCCCCCCCCCCCCCCC(=O)O
NPL	ST057534	5.82405	0.780332	CCCN1C[C@H](CSC)C[C@H]2[C@H]1Cc1c[nH]c3c1c2ccc3	AGONIST
NPL	ST082263	1.0553	1.0086	O=C1CC[C@]2(C(=C1)CC[C@@H]1[C@@H]2CC[C@]2([C@H]1CC[C@H]2O)C)C
NPL	ST105573	1.07882	1.0165	OC(=O)CCC(=O)O[C@@H]1O[C@@H]2O[C@@]3(C)CC[C@@H]4[C@]2([C@H]([C@H]1C)CC[C@H]4C)OO3
NPL	ST097245	0.738001	0.910519	COc1cc(ccc1O)CC(=O)O
NPL	ST097616	0.979863	1.01089	C=CCc1cc(OC)c2c(c1)OCO2
NPL	ST098605	0.621868	0.721102	CCCC1CCCCN1
NPL	ST098723	0.918274	0.629887	CCCCC/C=C\C/C=C\CCCCCCCC(=O)O
NPL	ST099024	0.829796	0.805298	NCC(=O)N[C@H](C(=O)O)CC(C)C
NPL	ST104236	0.888066	0.863701	OCC(=O)C1CCC2C1(C=O)CC(O)C1C2CCC2=CC(=O)CCC12C
NPL	ST024037	0.785172	0.793503	O[C@H](c1ccccc1)C[C@@H]1CCC[C@@H](N1C)CC(=O)c1ccccc1
NPL	ST057580	0.712451	0.822088	COc1ccc(cc1)c1coc2c(c1=O)c(O)cc(c2)O
NPL	ST082265	0.955451	0.876988	CC(=O)O[C@H]1C[C@H]2[C@H]([C@H]3[C@@]1(C)[C@H](CC3)C(=O)C)CC[C@H]1[C@]2(C)CC[C@H](C1)OC(=O)C
NPL	ST105587	0.822645	0.846081	C[C@@H](C(=O)OCc1ccccc1)N.Cl
NDL	ST000055	0.730625	0.822584	CCCCN(C(=O)c1cc(OC)c(c(c1)OC)OC)C1=CC2N(C(C1)CC2)C
NDL	ST000291	0.956388	1.05154	CC(COc1ccc(cc1)C(=O)N/C(=C/c1ccccc1)/C(=O)NCCNC(=O)/C(=C/c1ccccc1)/NC(=O)c1ccc(cc1)OCC(C)C)C
NDL	ST001314	0.839421	0.920031	O=C(/C(=C/c1ccccc1)/NC(=O)c1ccccc1)NCCCCCCNC(=O)/C(=C\c1ccccc1)/NC(=O)c1ccccc1
NDL	ST001350	1.07686	1.02864	OC(=O)C(N1C(=O)c2c(C1=O)cccc2)Cc1ccccc1
NDL	ST001351	1.06073	0.703029	OCC1OC(NC(=O)N(N=O)C)C(C(C1O)O)O
NDL	ST001454	1.4438	1.14273	Cc1ccc(cc1)S(=O)(=O)OC1C2OC(OC2OC1C1COC(O1)(C)C)(C)C
NDL	ST001455	0.179426	0.273194	COC1OC2COC(OC2C(C1OS(=O)(=O)c1ccc(cc1)C)O)c1ccccc1
NDL	ST001456	1.9151	1.20225	OCC1OC(OCc2ccccc2)C(C(C1O)O)NC(=O)C
NDL	ST001458	0.671962	0.68973	CC(=O)OCC1OC(OC(=O)C)C(C(C1OC(=O)C)OC(=O)C)OC(=O)C
NDL	ST001460	1.75063	1.22122	COC1OC2COC(OC2C(C1OC(=O)c1ccccc1)OC(=O)c1ccccc1)c1ccccc1
NDL	ST001462	0.849489	0.802238	N#N=NCCOC1OC(COC(=O)C)C(C(C1OC(=O)C)OC(=O)C)OC(=O)C
NDL	ST001503	1.52346	1.29756	CCOC(=O)/C(=C/c1ccc(cc1)Cl)/C#N
NDL	ST001557	0.969295	0.759715	CCOC(=O)c1ccc(cc1)NC(=S)NC1OC(COC(=O)C)C(C(C1OC(=O)C)OC(=O)C)OC(=O)C
NDL	ST001560	1.35852	1.25859	CCCCOC(=O)NC1OC(COC(=O)C)C(C(C1OC(=O)C)OC(=O)C)OC(=O)C
NDL	ST001561	0.97322	0.670835	CC(=O)OCC1OC(NC(=O)OC2CCCCC2)C(C(C1OC(=O)C)OC(=O)C)OC(=O)C
NDL	ST001577	1.85737	1.36198	CC(=O)OC1CCC2([C@H](C1)CCC1C2CCC2(C1CC[C@]2(OC(=O)C)C(OC(=O)C)C)C)C
NDL	ST001593	0.708843	1.04256	NC(CCCCC(=O)O)CCCCCC(=O)O.Cl
NDL	ST001626	1.23412	0.859235	COc1ccc(cc1)/C=C/C(=O)Nc1ccccc1
NDL	ST001635	1.07486	1.09503	COc1ccc(cc1)/C=C/C(=O)Nc1ccc(cc1)NC(=O)C
NDL	ST001691	1.10629	1.07803	Oc1ccc2c(c1)c(C(=O)O)c(o2)C
NDL	ST001732	1.12209	1.13189	CCOC(=O)/C(=C/c1ccccc1Br)/C#N
NDL	ST001875	1.31098	1.1151	CCOC(=O)c1c2cc(OC(=O)C)c(cc2n(c1CSc1ccc(cc1)C)C)Br
NDL	ST001922	1.4071	1.14259	Cc1ccc(cc1)NC(=O)Cc1c(Sc2ccccc2)c2c(n1C)cccc2
NDL	ST001934	1.31208	1.09586	CCCCCCCCCCn1c(C)c(c2c1ccc(c2)O)C(=O)OCC
NDL	ST001941	1.10508	0.942519	CN1CCc2c(C1)c1ccccc1[nH]2
NDL	ST002011	1.37419	1.18066	CCOC(=O)c1c2cc(O)c(cc2n(c1C)C1CCCCC1)Br
NDL	ST002046	1.46588	0.9848	Cc1ccc(cc1)C(=O)/C=C/c1ccc(cc1Cl)Cl
NDL	ST002048	1.47809	1.12069	Brc1ccc(cc1)C(=O)/C=C/c1ccc(cc1Cl)Cl
NDL	ST002049	1.27932	1.13596	Clc1ccc(c(c1)Cl)/C=C/C(=O)c1cccc2c1cccc2
NDL	ST002075	1.14383	1.16139	CC(COC(=O)/C=C/c1ccc(cc1)[N+](=O)[O-])Cl
NDL	ST002086	1.24927	0.983039	Clc1ccc(c(c1)Cl)/C=C/C(=O)c1ccc(cc1)C(C)(C)C
NDL	ST002217	1.32412	1.25358	O=C(/C(=C\c1ccc2c(c1)OCO2)/NC(=O)c1ccccc1)NCCCCCCNC(=O)/C(=C\c1ccc2c(c1)OCO2)/NC(=O)c1ccccc1
NDL	ST002232	1.77511	1.07814	CCOC(=O)c1c2cc(OC)c(cc2n(c1CN1CCCCC1)c1ccccc1)Br
NDL	ST002262	1.03068	0.965525	CCOC(=O)c1c2cc(OC)c(cc2n(c1C)c1ccccc1)Br
NDL	ST002321	1.81128	0.932847	OC(=O)/C=C/c1cccc(c1)[N+](=O)[O-]
NDL	ST002489	1.2335	1.06529	COC(=O)/C(=C\C(=O)c1ccccc1)/Nc1ccc(cc1)I
NDL	ST002695	1.03512	0.837714	O=C(CCCCC(=O)O)CCCCCCCCCCC(=O)O
NDL	ST002729	1.27745	1.14563	CCCCCCCC(C(=O)O)CCCC(=O)O
NDL	ST002734	2.43236	0.905799	CCCCCCCCC(C(=O)O)CCCCCCCCCCC(=O)O
NDL	ST002787	1.24469	1.1323	COC(=O)CCC(C1CC=C2C1(C)C(=O)CC1C2=CCC2C1(C)CCC(C2)OC(=O)OC)C
NDL	ST002793	1.50385	0.914366	CC(=O)OC1CCC2(C(=CCC3C2CCC2(C3CC3C2(O3)[C@@H](OC(=O)C)C)C)C1)C
NDL	ST002794	1.73115	1.18097	CC(=O)OC1CCC2(C(=CCC3C2CCC2(C3CCC2C(O)C)C)C1)C
NDL	ST002795	1.30211	0.909496	CO[C@@H]1CC2C(C1C(=O)C)(C)CCC1C2CC=C2C1(C)CCC(C2)O[Si](C(C)(C)C)(C)C
NDL	ST002796	1.46996	1.24381	O=C1CCC2(C(=C1)CCC1C2CCC2(C1CC[C@]12OCOC21OCOC2)C)C
NDL	ST002797	1.43499	1.02729	O/N=C(\C1=CCC2C1(C)CCC1C2CC[C@@H]2C1(C)CCC(C2)OC(=O)C)/C
NDL	ST002799	1.57619	1.22809	CC(CCCC(C1CCC2C1(C)CCC1C2CC=C2C1(C)CCC(C2)OC(=O)c1cccc(c1)[N+](=O)[O-])C)C
NDL	ST002870	0.903516	0.946975	CCCCCC(C(=O)O)CCC#N
NDL	ST002875	1.61481	1.19596	O=C(CCCCC(=O)O)CCCCC(=O)C
NDL	ST002905	0.851596	1.0571	OCCCCCCCCCCCCCCCC(=O)O
NDL	ST002906	1.10063	1.05893	CCCCCCCCCCC(=O)CCCC(=O)O
NDL	ST003334	1.25361	1.07499	COc1ccc2c(c1)nc(nc2C)N/C(=N/C(=O)C)/N
NDL	ST003848	1.49457	1.13382	O=C(Oc1ccc(cc1)/C=N/c1ccc(cc1)F)/C=C/c1ccccc1Cl
NDL	ST004334	1.08024	1.00256	NC(=N)NS(=O)(=O)c1ccc(cc1)N/C=C/1\C(=O)C(=C(c2c1c(O)c(c(c2)C)c1c(C)cc2c(c1O)/C(=C/Nc1ccc(cc1)S(=O)(=O)NC(=N)N)/C(=O)C(=C2C(C)C)O)C(C)C)O
NDL	ST004335	1.32776	1.08125	O=C1NC(=O)C(=CC2C(=O)C(=C(c3c2c(O)c(c(c3)C)c2c(C)cc3c(c2O)C(C=C2C(=O)NC(=O)NC2=O)C(=O)C(=C3C(C)C)O)C(C)C)O)C(=O)N1
NDL	ST004388	1.25393	1.1532	COc1cc(ccc1OC)C(=O)Nc1ccc(cc1C)Br
NDL	ST004882	1.17428	1.18591	COc1cc(ccc1OC)C(=O)N1CCN(CC1)c1ccccc1
NDL	ST005054	1.49678	1.23814	O=C(C(C)C)OCC1CCC[N+]2(C1CCCC2)C.[I-]
NDL	ST005055	1.32842	1.24781	CC(CC(=O)OCC1CCC[N+]2(C1CCCC2)C)C.[I-]
NDL	ST005056	1.6042	1.17482	O=C(C(C)(C)C)OCC1CCC[N+]2(C1CCCC2)C.[I-]
NDL	ST005058	1.83157	1.21628	COc1ccccc1C(=O)OCC1CCC[N+]2(C1CCCC2)C.[I-]
NDL	ST005059	1.43997	1.1588	O=C(Cc1ccccc1)OCC1CCC[N+]2(C1CCCC2)C.[I-]
NDL	ST005063	1.51138	1.17251	O=C(CCN1C(=O)CCC1=O)OCC1CCC[N+]2(C1CCCC2)C.[I-]
NDL	ST005069	1.36261	1.06297	O=C(c1ccccc1O)OCC1CCC[N+]2(C1CCCC2)C.[I-]
NDL	ST005078	1.28606	1.18781	C[N+]12CCCC(C2CCCC1)COC1CCCCC1.[I-]
NDL	ST005080	0.793947	1.04218	C[N+]12CCCC(C2CCCC1)COc1cccc2c1nccc2.[I-]
NDL	ST005085	1.10212	1.10636	O=C(Oc1ccccc1)COCC1CCC[N+]2(C1CCCC2)C.[I-]
NDL	ST005086	1.8621	0.835434	O=C1CCC(=O)N1C1CCC[N+]2(C1CCCC2)C.[I-]
NDL	ST005087	1.71804	1.19044	O=C1CCCC(=O)N1C1CCC[N+]2(C1CCCC2)C.[IH+]
NDL	ST005092	1.70164	0.969636	CCCCCCCOC(=O)COCC1CCC[N+]2(C1CCCC2)C.[I-]
NDL	ST005106	1.29772	1.13278	C[N+]1(CCOCC2CCC[N+]3(C2CCCC3)C)CCCCC1.[I-].[I-]
NDL	ST005109	0.626077	0.980724	C[N+]1(CCCC(C1)c1ccccn1)CCOCC1CCC[N+]2(C1CCCC2)C.[I-].[I-]
NDL	ST005114	0.658796	1.14626	CC(C[N+]1(C)CCCCC1)OC(=O)CCCCC(=O)OC(C[N+]1(C)CCCCC1)C.[I-].[I-]
NDL	ST005130	2.01601	0.88345	CN1CCN(CC1)CCN/C=C/1\C(=O)C(=C(c2c1c(O)c(c(c2)C)c1c(C)cc2c(c1O)/C(=C/NCCN1CCN(CC1)C)/C(=O)C(=C2C(C)C)O)C(C)C)O
NDL	ST005132	1.44304	1.14771	CC1CCC(N1N/C=C/1\C(=O)C(=C(c2c1c(O)c(c(c2)C)c1c(C)cc2c(c1O)/C(=C/NN1CCCC1Cc1ccco1)/C(=O)C(=C2C(C)C)O)C(C)C)O)Cc1ccco1
NDL	ST005133	1.45562	0.917233	CC(C1=C(O)C(=O)/C(=C\NC2CCCCC2Cc2ccco2)/c2c1cc(C)c(c2O)c1c(C)cc2c(c1O)/C(=C/NC1CCCCC1Cc1ccco1)/C(=O)C(=C2C(C)C)O)C
NDL	ST005134	1.68736	1.18263	CC(CCc1ccco1)N/C=C/1\C(=O)C(=C(c2c1c(O)c(c(c2)C)c1c(C)cc2c(c1O)/C(=C/NC(CCc1ccco1)C)/C(=O)C(=C2C(C)C)O)C(C)C)O
NDL	ST005135	1.5846	0.863	CC(C1=C(O)C(=O)/C(=C\NCc2cccnc2)/c2c1cc(C)c(c2O)c1c(C)cc2c(c1O)/C(=C/NCc1cccnc1)/C(=O)C(=C2C(C)C)O)C
NDL	ST005136	1.46857	1.12532	CCCCCC1CCC(=O)N1CCN/C=C/1\C(=O)C(=C(c2c1c(O)c(c(c2)C)c1c(C)cc2c(c1O)/C(=C/NCCN1C(CCCCC)CCC1=O)/C(=O)C(=C2C(C)C)O)C(C)C)O
NDL	ST005138	1.20489	0.821859	CCC(/N=C/c1c(O)c(O)c(c2c1c(O)c(c(c2)C)c1c(C)cc2c(c1O)c(/C=N/C(CC)O)c(c(c2C(C)C)O)O)C(C)C)O
NDL	ST005179	1.4352	1.17634	OCC(c1ccccc1)C(=O)O[C@@H]1CC2[NH+](C(C1)C1C2O1)C.[Br-]
NDL	ST005183	1.24895	1.0029	CC(=O)OC1CCC2(C(C1(C)C)CCC1(C2C(=O)C=C2C1(C)CCC1(C2CC(C)(CC1)C(=O)Nc1ccc(c(c1)Cl)Cl)C)C)C
NDL	ST005185	1.37498	1.07935	CC(=O)OC1CCC2(C(C1(C)C)CCC1(C2C(=O)C=C2C1(C)CCC1(C2CC(C)(CC1)C(=O)Nc1ccccc1O)C)C)C
NDL	ST005186	1.27445	1.14833	CC(=O)OC1CCC2(C(C1(C)C)CCC1(C2C(=O)C=C2C1(C)CCC1(C2CC(C)(CC1)C(=O)Nc1ccc(cc1)/N=N/c1ccccc1)C)C)C
NDL	ST005190	1.16675	1.18581	C#CCOC(=O)C1(C)CCC2(C(C1)C1=CC(=O)C3C(C1(CC2)C)(C)CCC1C3(C)CCC(C1(C)C)OC(=O)C)C
NDL	ST005197	1.08885	1.08035	CC(=O)OC1CCC2(C(C1(C)C)CCC1(C2C(=O)C=C2C1(C)CCC1(C2CC(C)(CC1)C(=O)Nc1ccc(cc1)C)C)C)C
NDL	ST005199	1.1895	1.08874	CC(=O)OC1CCC2(C(C1(C)C)CCC1(C2C(=O)C=C2C1(C)CCC1(C2CC(C)(CC1)C(=O)NCc1ccccc1)C)C)C
NDL	ST005200	1.225	1.15586	CC(=O)OC1CCC2(C(C1(C)C)CCC1(C2C(=O)C=C2C1(C)CCC1(C2CC(C)(CC1)C(=O)Nc1ccc(cc1)N(=O)=O)C)C)C
NDL	ST005201	1.29148	1.1407	CC(=O)OC1CCC2(C(C1(C)C)CCC1(C2C(=O)C=C2C1(C)CCC1(C2CC(C)(CC1)C(=O)Nc1cccc(c1)N(=O)=O)C)C)C
NDL	ST005206	1.40974	1.14329	CC(=O)OC1CCC2(C(C1(C)C)CCC1(C2C(=O)C=C2C1(C)CCC1(C2CC(C)(CC1)C(=O)OCC1CCCN2C1CCCC2)C)C)C
NDL	ST005208	1.33784	1.23013	CC(=O)OC1CCC2(C(C1(C)C)CCC1(C2C(=O)C=C2C1(C)CCC1(C2CC(C)(CC1)C(=O)OC(N1CCCCC1)C)C)C)C
NDL	ST005211	1.581	1.13969	C=CCOC(=O)C1(C)CCC2(C(C1)C1=CC(=O)C3C(C1(CC2)C)(C)CCC1C3(C)CCC(C1(C)C)OC(=O)C)C
NDL	ST005213	1.3881	1.22218	CCN(CCOC(=O)C1(C)CCC2(C(C1)C1=CC(=O)C3C(C1(CC2)C)(C)CCC1C3(C)CCC(C1(C)C)OC(=O)C)C)CC
NDL	ST005216	1.54047	1.21683	O=C1C=C2C3CC(C)(CCC3(C)CCC2(C2(C1C1(C)CCC(CC1CC2)OC1OC(C(=O)O)C(C(C1OC1OC(C(=O)O)C(C(C1O)O)O)O)O)C)C)C(=O)O[Zn]OC(=O)C1(C)CCC2(C(C1)C1=CC(=O)C3C(C1(CC2)C)(C)CCC1C3(C)CCC(C1)OC1OC(C(=O)O)C(C(C1OC1OC(C(=O)O)C(C(C1O)O)O)O)O)C
NDL	ST005222	1.50575	1.24129	O=C1C=C2C3CC(C)(CCC3(C)CCC2(C2(C1C1(C)CCC(CC1CC2)OC1OC(C(=O)O)C(C(C1OC1OC(C(=O)O)C(C(C1O)O)O)O)O)C)C)C(=O)O[Fe](OC(=O)C1(C)CCC2(C(C1)C1=CC(=O)C3C(C1(CC2)C)(C)CCC1C3(C)CCC(C1)OC1OC(C(=O)O)C(C(C1OC1OC(C(=O)O)C(C(C1O)O)O)O)O)C)OC(=O)C1(C)CCC2(C(C1)C1=CC(=O)C
NDL	ST005223	1.41169	1.12812	O=C1C=C2C3CC(C)(CCC3(C)CCC2(C2(C1C1(C)CCC(CC1CC2)OC1OC(C(=O)O)C(C(C1OC1OC(C(=O)O)C(C(C1O)O)O)O)O)C)C)C(=O)O[Co]OC(=O)C1(C)CCC2(C(C1)C1=CC(=O)C3C(C1(CC2)C)(C)CCC1C3(C)CCC(C1)OC1OC(C(=O)O)C(C(C1OC1OC(C(=O)O)C(C(C1O)O)O)O)O)C.NCCCN.NCCCN
NDL	ST005635	1.27248	1.17721	CCCOc1ccc(cc1OC)C=O
NDL	ST005846	0.66103	0.910705	COc1cc(cc(c1OC)OC)C(=O)NCCOc1ccc(cc1)C
NDL	ST005872	10.4008	1.10919	COc1cc(cc(c1OC)OC)C(=O)NCCOc1ccccc1C	AGONIST
NDL	ST005874	1.32669	0.89972	COc1cc(cc(c1OC)OC)C(=O)NCCOc1ccc(c(c1)C)C
NDL	ST005893	1.02936	1.14422	COc1cc(ccc1OC)C(=O)NCCOc1ccc(cc1)C
NDL	ST005930	0.64839	1.05071	CCCCOc1ccccc1NC(=O)c1cc(OC)c(c(c1)OC)OC
NDL	ST006037	1.47338	1.06242	COc1cc(cc(c1OC)OC)C(=O)Nc1ccccc1OC(C)C
NDL	ST006587	0.697962	0.888148	N#CC1=C(N)Oc2c(C1c1ccc(c(c1)Cn1nc(c(c1C)Br)[N+](=O)[O-])OC)c(=O)oc1c2cccc1
NDL	ST006593	1.39705	1.08366	N#CC1=C(N)Oc2c(C1c1ccc(c(c1)CCc1ccc(cc1)Cl)OC)c(=O)oc1c2cccc1
NDL	ST007000	0.69193	0.971467	N#CC1=C(N)Oc2c(C1c1ccccc1)c(=O)[nH]c(=O)[nH]2
NDL	ST007035	1.19985	0.868182	N#CC1=C(N)Oc2c(C31C(=O)Nc1c3cccc1)c(=O)n(c(=O)n2C)C
NDL	ST007286	2.38171	0.952191	COc1cc(ccc1OC)C(=O)c1sc2c(c1N)c(C)cc(n2)C
NDL	ST007299	1.19698	1.14422	N#CC1=C(N)Oc2c(C1c1ccc(cc1)Cl)c(=O)n(c(=O)n2C)C
NDL	ST007922	0.798496	0.976372	COc1cc(CNS(=O)(=O)c2ccc(cc2)CN2C(=O)c3c(C2=O)cccc3)cc(c1OC)OC
NDL	ST007974	1.1991	1.20384	COc1cc(cc(c1OC(=O)c1ccccc1Cl)OC)C(=S)N1CCOCC1
NDL	ST008364	1.70764	0.92276	CC(=O)OC1CCC2(C(C1(C)C)CCC1(C2C(=O)C=C2C1(C)CCC1(C2CC(C)(CC1)C(=O)OCC1CCCO1)C)C)C
NDL	ST008365	1.94086	1.19282	CC(=O)OC1CCC2(C(C1(C)C)CCC1(C2C(=O)C=C2C1(C)CCC1(C2CC(C)(CC1)C(=O)OC1CCCCC1C)C)C)C
NDL	ST008598	0.949545	1.07986	COC(=O)CNC(=O)c1ccc(cc1)NC(=O)C
NDL	ST008655	0.980831	1.1019	CCOC(=O)CNC(=O)c1cc(Cl)ccc1Cl
NDL	ST008666	0.918297	1.07962	Clc1ccc(c(c1)C(=O)N1CCc2c(C1)cccc2)Cl
NDL	ST008985	1.31416	1.11475	COc1cc(ccc1OC)C(=O)Nc1ccccc1C(=O)OCC(=O)c1ccc(cc1)Cl
NDL	ST008990	1.04043	1.03333	O=C(N1c2ccccc2Sc2c1cccc2)c1cccc(c1)S(=O)(=O)N1CCCCCC1
NDL	ST009494	0.956199	0.82628	OC(=O)c1ccccc1c1c2cc(I)c(c(c2oc2c1cc(I)c(=O)c2I)I)O
NDL	ST009820	1.17459	1.12042	O=C1C2OCC(O2)[C@@H]2[C@@H]1[C@H]1N([C@H]2C(=O)c2ccc(cc2)F)C=Cc2c1cccc2
NDL	ST009866	1.14819	1.09054	N#CC1=C(N)Oc2c(C1c1ccc(o1)C)c(=O)oc1c2cccc1
NDL	ST009869	0.975658	1.15355	CCOC(=O)C1=C(N)Oc2c(C1c1ccc(cc1Cl)Cl)c(=O)oc1c2cccc1
NDL	ST009872	1.3606	1.27203	CCOC(=O)C1=C(N)Oc2c(C1c1c(F)cccc1Cl)c(=O)oc1c2cccc1
NDL	ST010134	1.29469	1.06878	O=C1OC(=O)c2c3c1ccc(c3ccc2)C#CC(O)(C)C
NDL	ST010178	1.42338	1.20909	COc1ccc(cc1)NC(=O)/C=C/c1ccccc1
NDL	ST010196	1.11934	1.17852	COC1CCCC(O1)C
NDL	ST010199	1.33966	1.24446	COC1OC(C)C(C(C1O)O)OCc1ccccc1
NDL	ST010204	1.25466	1.07897	CCC1CCCCO1
NDL	ST010548	1.44204	1.19876	COc1cc(OC)ccc1NC(=O)Cc1ccccc1
NDL	ST010639	0.890889	0.971501	CCOC(=O)CNC(=O)c1ccc(cc1Cl)Cl
NDL	ST010647	1.24053	1.02363	COc1cc(ccc1OC)C(=O)Nc1ccc(c(c1)C)Br
NDL	ST010648	1.05275	0.93713	COc1cc(ccc1OC)C(=O)Nc1cc(Cl)cc(c1)Cl
NDL	ST011269	1.538	1.12145	CCOC(=O)CNC(=O)c1ccc(c(c1)[N+](=O)[O-])OC
NDL	ST011381	1.42799	0.902829	Clc1ccc(cc1)n1nc2c(n1)cc(cc2)NC(=O)c1ccc2c(c1)OCCO2
NDL	ST011566	0.778136	0.729213	O=C1C2OCC(O2)[C@H]2[C@@H]1[C@H]1C=Cc3c(N1[C@@H]2C(=O)c1ccccc1)cccc3
NDL	ST011915	0.637295	0.905696	C=CCOC1OC(COC(=O)C)C(C(C1OC(=O)C)OC(=O)C)OC(=O)C
NDL	ST011916	1.10288	1.02428	COC1OC(COC(c2ccccc2)(c2ccccc2)c2ccccc2)C(C(C1O)O)O
NDL	ST011966	0.721047	1.02359	CCOC(=O)C(NC(=O)c1ccccc1)CCCNC(=N)N.Cl
NDL	ST011968	1.27446	1.06874	CC(=O)NC(C(=O)O)Cc1c[nH]c2c1cccc2
NDL	ST011982	2.00332	0.945904	OC[C@H]1O[C@H](O)[C@@H]([C@H]([C@@H]1O[C@H]1O[C@H](CO)[C@H]([C@@H]([C@H]1O)O)O)O)O.O
NDL	ST012102	1.21656	1.02017	COc1ccc(c(c1)OC)NC(=O)Cc1ccccc1OC
NDL	ST012322	1.36223	0.973608	CCOC(=O)Nc1ccc2c(c1)N(C(=O)CCN1CCOCC1)c1c(S2)cccc1
NDL	ST012373	1.80459	1.19406	OC1C(O)C(OC1n1cnc2c1nc(N)[nH]c2=O)CP(=O)([O-])[O-].[Na+].[Na+]
NDL	ST012388	1.72046	0.946353	OCC1OC(C(C1O)P(=O)([O-])[O-])n1cnc2c1nc(N)[nH]c2=O.[Na+].[Na+]
NDL	ST012391	1.52425	1.27866	OCC1OC(C2C1OP(=O)(O2)O)n1ccc(nc1=O)N
NDL	ST012395	0.861853	1.03409	O=c1[nH]cnc2c1nn[nH]2
NDL	ST012416	1.09395	1.09033	NC(=O)NCCCCC(C(=O)O)N
NDL	ST012454	1.0376	1.16515	OC(=O)C1CCCN1S(=O)(=O)c1ccccc1
NDL	ST012706	1.03929	1.12532	CCOC(=O)CNC(=O)c1ccc(c(c1)[N+](=O)[O-])Cl.Cl
NDL	ST012707	1.16668	1.10128	COC(=O)CNC(=O)c1ccc(c(c1)[N+](=O)[O-])Cl
NDL	ST012714	1.28174	1.16387	COC(=O)CNC(=O)c1ccc(cc1Cl)[N+](=O)[O-]
NDL	ST012799	1.11845	1.14128	O=C1NC(=O)C(=Cc2ccc3c(c2)OCO3)C(=O)N1
NDL	ST012804	2.45219	1.10042	O=C1NC(=O)C(=Cc2ccc(cc2)[N+](=O)[O-])C(=O)N1
NDL	ST012873	1.48837	1.17887	O=C1N(CC2CCC[N+]3(C2CCCC3)C)C(=O)c2c1cccc2.[I-]
NDL	ST012882	1.32383	1.32063	CC(C1=C(O)C(=O)/C(=C\Nc2c(C)n(n(c2=O)c2ccccc2)C)/c2c1cc(C)c(c2O)c1c(C)cc2c(c1O)/C(=C/Nc1c(C)n(n(c1=O)c1ccccc1)C)/C(=O)C(=C2C(C)C)O)C
NDL	ST012883	1.46753	1.13772	CC(C1=C(O)C(=O)/C(=C\Nc2ccccc2C)/c2c1cc(C)c(c2O)c1c(C)cc2c(c1O)/C(=C/Nc1ccccc1C)/C(=O)C(=C2C(C)C)O)C
NDL	ST012885	1.02832	1.0438	Nc1ccc(cc1)c1ccc(cc1)N/C=C/1\C(=O)C(=C(c2c1c(O)c(c(c2)C)c1c(C)cc2c(c1O)/C(=C/Nc1ccc(cc1)c1ccc(cc1)N)/C(=O)C(=C2C(C)C)O)C(C)C)O
NDL	ST012886	1.36432	1.13945	CC(C1=C(O)C(=O)/C(=C\Nc2ccc(cc2)S(=O)(=O)N)/c2c1cc(C)c(c2O)c1c(C)cc2c(c1O)/C(=C/Nc1ccc(cc1)S(=O)(=O)N)/C(=O)C(=C2C(C)C)O)C
NDL	ST012887	1.69616	1.11949	CC(C1=C(O)C(=O)/C(=C\NNC(=O)c2ccncc2)/c2c1cc(C)c(c2O)c1c(C)cc2c(c1O)/C(=C/NNC(=O)c1ccncc1)/C(=O)C(=C2C(C)C)O)C
NDL	ST012891	0.903784	0.783757	CC(C1=C(O)C(=O)/C(=C\Nc2cccc3c2cccc3N)/c2c1cc(C)c(c2O)c1c(C)cc2c(c1O)/C(=C/Nc1cccc3c1cccc3N)/C(=O)C(=C2C(C)C)O)C
NDL	ST012892	1.38964	1.25065	[Na]OS(=O)(=O)c1cc(O)c(c2c1cccc2)N/C=C/1\C(=O)C(=C(c2c1c(O)c(c(c2)C)c1c(C)cc2c(c1O)/C(=C/Nc1c(O)cc(c3c1cccc3)S(=O)(=O)O[Na])/C(=O)C(=C2C(C)C)O)C(C)C)O
NDL	ST012900	0.662839	0.772047	OCC1CCCN2C1CCCC2.Cl[Cu]Cl.O.O
NDL	ST012915	1.22569	1.17721	CC(CN1CCCCC1c1cccnc1)O.Cl[Cu]Cl.O.O
NDL	ST012935	1.53497	0.764586	CC(=O)N1CCCCC1c1cccnc1.Cl[Cu]Cl.O.O
NDL	ST012939	1.85661	1.21144	[O-][N+](=O)O[Co]O[N+](=O)[O-].OCC1CCCN2C1CCCC2.O.O.O.O.O.O
NDL	ST012940	0.635101	0.86946	CC(CN1CCCCC1c1cccnc1)O.[O-][N+](=O)O[Co]O[N+](=O)[O-].O.O.O.O.O.O
NDL	ST012949	1.04418	1.15935	O=S1(=O)O[Co]O1.OCCN1CCCCC1c1cccnc1.O.O.O.O.O.O.O
NDL	ST012956	0.446042	0.785588	C1CCC(NC1)c1cccnc1.Cl[Cu]Cl.O.O
NDL	ST012957	1.04222	1.2235	C=CCNC(=S)OCCN1CCCCC1c1cccnc1.Cl[Cu]Cl.O.O
NDL	ST012960	0.878919	0.762202	O=C(c1ccccc1C)OCC1CCCN2C1CCCC2.[O-][N+](=O)O[Co]O[N+](=O)[O-].O.O.O.O.O.O
NDL	ST013021	1.58105	1.2645	COc1c(OC)cc(cc1OC)C(=O)Oc1c(/C=N\NC(=O)c2ccc(nc2)C)cc(cc1Br)Br
NDL	ST013038	2.24566	0.810839	Brc1cc(/C=N\NC(=O)c2ccc3c(c2)OCO3)c(c(c1)Br)OC(=O)c1cccc(c1)F
NDL	ST013043	1.4734	1.13171	O=C(c1ccc2c(c1)OCO2)N/N=C/c1cc(ccc1O)/N=N/c1cccc2c1cccc2
NDL	ST013044	1.02445	0.878855	O=C(c1ccc2c(c1)OCO2)N/N=C/c1cc(/N=N/c2cccc(c2)C(F)(F)F)ccc1O
NDL	ST013114	0.947428	1.33873	COC(=O)C1=C(C)NC2=C(C1c1cc(Br)c(c(c1)OC)O)C(=O)CC(C2)c1ccccc1
NDL	ST013134	0.915457	0.904176	COc1cc(cc(c1O)Br)C1C(=C(C)NC2=C1C(=O)CCC2)C(=O)OC(C)C
NDL	ST013141	1.34897	1.18992	COC(=O)C1=C(C)NC2=C(C1c1cc(Br)c(c(c1)OC)O)C(=O)CCC2
NDL	ST013145	0.90811	1.18135	COC(=O)C1=C(C)NC2=C(C1c1cccc(c1)Br)C(=O)CC(C2)(C)C
NDL	ST013165	0.998794	1.32091	COc1cc(cc(c1O)Br)C1C(=C(C)NC2=C1C(=O)CC(C2)(C)C)C(=O)OC(C)C
NDL	ST013170	0.76722	1.02449	CCCCCOC(=O)C1=C(C)NC2=C(C1c1cc(Br)c(c(c1)OC)O)C(=O)CCC2
NDL	ST013172	1.46198	1.0438	CCOC(=O)C1=C(C)NC2=C(C1c1cc(Br)c(c(c1)OC)O)C(=O)CCC2
NDL	ST013175	1.08641	1.07147	COc1cc(cc(c1O)Cl)C1C(=C(C)NC2=C1C(=O)CCC2)C(=O)OC(C)C
NDL	ST013195	1.014	1.16253	CCCOC(=O)C1=C(C)NC2=C(C1c1ccc(c(c1)Br)OC)C(=O)CC(C2)(C)C
NDL	ST013222	1.011	1.02207	COc1cc(cc(c1O)Br)C1C(=C(C)NC2=C1C(=O)CC(C2)(C)C)C(=O)OC1CCCC1
NDL	ST013224	0.935422	1.5634	COc1cc(cc(c1O)Cl)C1C(=C(C)NC2=C1C(=O)CCC2)C(=O)OC1CCCC1
NDL	ST013226	1.10515	1.08601	CCOCCOC(=O)C1=C(C)NC2=C(C1c1cc(Cl)c(c(c1)OC)O)C(=O)CC(C2)(C)C
NDL	ST013233	1.22505	1.15987	CCOCCOC(=O)C1=C(C)NC2=C(C1c1cc(Cl)c(c(c1)OC)O)C(=O)CCC2
NDL	ST013299	1.21873	1.0495	COc1cc(cc(c1OC)OC)C1CC(=O)Nc2c1ccc1c2cccc1
NDL	ST013307	1.51177	1.25496	CCOC(=O)C1=C(C)N(C)C(=O)NC1c1cc(Br)c(c(c1)OC)O
NDL	ST013313	1.30166	1.07924	COC(=O)C1=C(C)N(C)C(=O)NC1c1cc(Br)c(c(c1)OC)O
NDL	ST013335	1.1079	1.1113	COc1cc(cc(c1O)Br)C1NC(=O)N(C(=C1C(=O)OCCc1ccccc1)C)C
NDL	ST013336	0.637994	1.09365	COc1cc(cc(c1O)Cl)C1NC(=O)N(C(=C1C(=O)OCCOc1ccccc1)C)C
NDL	ST013355	1.39855	1.16436	CCCCCOC(=O)C1=C(C)NC2=C(C1c1cc(Cl)c(c(c1)OC)O)C(=O)CC(C2)(C)C
NDL	ST013357	1.78089	0.8592	COCCOC(=O)C1=C(C)NC2=C(C1c1cc(Br)c(c(c1)OC)O)C(=O)CCC2
NDL	ST013362	1.15829	1.08532	CCCCCOC(=O)C1=C(C)NC2=C(C1c1cc(Cl)c(c(c1)OC)O)C(=O)CCC2
NDL	ST013440	1.67287	0.885902	CCOC(=O)C1=C(CCC)NC(=O)NC1c1cc(Br)c(c(c1)OC)O
NDL	ST013845	1.65511	1.15348	O=Cc1ccc(o1)c1cc(cc(c1)OC(F)(F)F)OC(F)(F)F
NDL	ST013859	1.2003	0.888286	OC1C(O)C(OC1n1ccc(nc1=O)N)COP(=O)([O-])[O-].[Na+].[Na+]
NDL	ST013863	1.42989	1.07786	OC(=O)CNC(=O)c1ccccc1O
NDL	ST013865	0.670004	0.833154	OCC1OC(Oc2ccc3c(c2)oc(=O)cc3C)C(C(C1O)O)O
NDL	ST013874	1.4303	1.34723	OCC1OC(Oc2c(O)c(OC)cc3c2oc(=O)cc3)C(C(C1O)O)O
NDL	ST013875	1.78153	0.913157	OC1C(O)C(OC1n1cnc2c1nc(N)[nH]c2=O)COP(=O)(O)O
NDL	ST013885	1.40462	1.24412	CCCCOC1CC[C@]2(C(=CC[C@@H]3[C@@H]2CC[C@]2([C@H]3CC[C@@H]2[C@@H](CCCC(C)C)C)C)C1)C
NDL	ST014085	1.68557	0.758817	N#CC1=C(N)Oc2c(C1c1ccccc1)c(=O)c1c(o2)cc(cc1)Cl.Cl
NDL	ST014287	1.90264	1.24992	N#CC1=C(N)Oc2c(C1c1cccc(c1)F)c(=O)n(c(=O)n2C)C
NDL	ST014351	1.28677	0.836194	CCOC(=O)C1=C(N)Oc2c(C1c1cccc(c1)Br)c(=O)oc1c2cccc1
NDL	ST014439	2.18496	1.20118	CCOC(=O)CNC(=O)c1ccccc1Cl
NDL	ST014458	0.94334	0.771978	CCOC(=O)CNC(=O)c1cccc(c1)Cl.Cl
NDL	ST014701	1.30342	1.21265	ClC1(Cl)C2C1C1(C3C2C2C4CC4C3C32CC3)CC1
NDL	ST014848	0.88157	1.0095	CN(Cc1c(O)ccc2c1occ(c2=O)c1ccc(cc1Cl)Cl)C
NDL	ST014917	1.34656	1.16032	CCOC(=O)C1=C(C)NC2=C(C1c1cc(OC)c(c(c1)OC)OC)C(=O)CC(C2)c1ccc(cc1)Cl
NDL	ST015000	1.01201	1.04062	CCOC(=O)C1=C(C)NC2=C(C1c1ccc(c(c1)OCC)O)C(=O)CC(C2)c1ccc(cc1)Cl
NDL	ST015003	1.3096	1.12505	CCOC(=O)C1=C(C)NC2=C(C1c1ccc(c(c1)OC)O)C(=O)CC(C2)c1ccc(cc1)Cl
NDL	ST015022	0.959231	1.16363	COc1cc(cc(c1O)Cl)C1NC(=O)NC(=C1C(=O)OCCOc1ccccc1)C
NDL	ST015025	1.04746	1.19807	CCCCOC(=O)C1=C(C)NC(=O)NC1c1cc(Cl)c(c(c1)OC)O
NDL	ST015028	1.27209	1.17942	COCCOC(=O)C1=C(C)NC2=C(C1c1cc(Cl)c(c(c1)OC)O)C(=O)CCC2
NDL	ST015061	1.24599	1.19572	CCOc1cc(cc(c1O)Br)C1C(=C(C)NC2=C1C(=O)CCC2)C(=O)OCCc1ccccc1
NDL	ST015079	1.32939	1.08187	CCOc1cc(cc(c1O)Br)C1C(=C(C)NC2=C1C(=O)CC(C2)(C)C)C(=O)OCCc1ccccc1
NDL	ST015082	1.33333	1.12629	COc1ccc(cc1Br)C1C(=C(C)NC2=C1C(=O)CC(C2)(C)C)C(=O)OCCOc1ccccc1
NDL	ST015143	1.43385	1.03568	COc1cc(cc(c1O)Cl)C1NC(=O)NC(=C1C(=O)OC1CCCCCCC1)C
NDL	ST015200	1.7757	1.22529	CCCCCCCOC(=O)C1=C(C)NC(=O)NC1c1cc(Br)c(c(c1)OC)O
NDL	ST015213	1.1251	1.09427	COC(=O)C1=C(C)NC2=C(C1c1cc(OC)c(c(c1)OC)OC)C(=O)CC(C2)c1ccc(cc1)Cl
NDL	ST015228	1.11817	1.06373	CCOc1cc(cc(c1O)Br)C1C2=C(CC(CC2=O)c2ccc(cc2)Cl)NC(=C1C(=O)OC)C
NDL	ST015229	0.854896	1.0106	COC(=O)C1=C(C)NC2=C(C1c1ccc(c(c1)OC)O)C(=O)CC(C2)c1ccc(cc1)Cl
NDL	ST016345	1.39396	1.16004	OC(=O)C1CCCN1C(=O)OCc1ccccc1
NDL	ST016598	1.04521	0.835883	[O-][N+](=O)N1CCn2c3C1CCCc3c1c2ccc(c1)C1CCCCC1
NDL	ST016609	1.74914	1.1438	N#CCCN1CCn2c3C1CCCc3c1c2ccc(c1)C
NDL	ST016611	1.06486	0.754015	Cc1ccc2c(c1)c1CCCC3c1n2CCN3[N+](=O)[O-]
NDL	ST016912	1.75106	1.1638	CCCCC(=O)Nc1ccc(c(c1)C)c1cc2ccccc2oc1=O
NDL	ST017012	1.12451	0.676465	COCCOC(=O)C1=C(C)NC2=C(C1c1cc(Br)c(c(c1)OCC)O)C(=O)CC(C2)c1ccc(cc1)Cl
NDL	ST017050	1.43778	1.1419	COc1cc(cc(c1O)Cl)C1C(=C(C)NC2=C1C(=O)CC(C2)c1ccccc1)C(=O)OC1CCCCC1
NDL	ST017055	2.12877	0.722995	COc1cc(cc(c1O)Br)C1NC(=O)NC(=C1C(=O)OCCOC(C)C)C
NDL	ST017059	1.09134	1.16691	CCOc1cc(cc(c1O)Br)C1C2=C(CC(CC2=O)c2ccc(cc2)OC)NC(=C1C(=O)OC)C
NDL	ST017060	1.40192	0.665273	COCCOC(=O)C1=C(C)NC2=C(C1c1cc(Br)c(c(c1)OCC)O)C(=O)CC(C2)c1ccccc1
NDL	ST017091	1.53427	1.23562	CCC(OC(=O)C1=C(C)NC2=C(C1c1cc(OC)c(c(c1)OC)OC)C(=O)CC(C2)c1ccc(cc1)Cl)C
NDL	ST017117	0.973403	0.575529	CCOc1cc(ccc1O)C1C2=C(CC(CC2=O)c2ccc(cc2)Cl)NC(=C1C(=O)OCC(C)C)C
NDL	ST017131	0.865856	1.25286	CCSCCOC(=O)C1=C(C)NC2=C(C1c1cc(Br)c(c(c1)OC)O)C(=O)CCC2
NDL	ST017132	0.839218	0.728349	CCOc1cc(ccc1O)C1C2=C(CC(CC2=O)c2ccc(cc2)Cl)NC(=C1C(=O)OC(CC)C)C
NDL	ST017140	1.46929	1.23707	CCOc1cc(cc(c1O)Br)C1C2=C(CC(CC2=O)c2ccc(cc2)OC)NC(=C1C(=O)OC(CC)C)C
NDL	ST017162	1.3318	0.82476	CCOc1cc(ccc1O)C1C(=C(C)NC2=C1C(=O)CC(C2)c1ccc(cc1)Cl)C(=O)OCCc1ccccc1
NDL	ST017243	1.11109	1.14847	CCSCCOC(=O)C1=C(C)NC2=C(C1c1ccc(c(c1)OCC)O)C(=O)CC(C2)c1ccc(cc1)Cl
NDL	ST017282	0.703284	0.928425	COCCOC(=O)C1=C(C)NC2=C(C1c1ccc(c(c1)OC)O)C(=O)CC(C2)c1ccc(cc1)Cl
NDL	ST017363	1.18147	1.07534	COc1cc(/C=N/NC(=O)CCC(=O)Nc2ccc(c(c2)C)C)cc(c1OC)OC
NDL	ST017700	1.29571	1.10273	COc1cc(/C=N/NC(=O)c2nn(cc2Br)Cc2ccc(cc2)Br)cc(c1OC)OC
NDL	ST018357	1.55799	1.16888	Clc1ccc(cc1)C1C2=C(Nc3c(N1C(=S)Nc1ccccc1)cccc3)CC(CC2=O)(C)C
NDL	ST018474	1.28647	1.05389	OC(=O)c1ccc(cc1)OCCn1c(CCCc2[nH+]c3c(n2CCOc2ccc(cc2)C(=O)O)cccc3)[nH+]c2c1cccc2.[O-]C(=O)C.[O-]C(=O)C
NDL	ST018508	1.66255	1.1657	OCC1OC(O)C(C(C1O)O)O
NDL	ST018530	1.47807	1.10615	OCC1COCC(C(C(C1O)O)O)O
NDL	ST018637	1.10862	1.14232	CCOc1cc(cc(c1O)Br)C1C(=C(C)NC2=C1C(=O)CC(C2)c1ccccc1)C(=O)OC
NDL	ST018723	1.50243	1.16923	CC(=O)N/C(=C/c1ccccc1)/C(=O)NCc1ccco1
NDL	ST018738	1.91885	1.20864	CC(=O)Nc1ccc(cc1)S(=O)(=O)N1CCCC1C(=O)O
NDL	ST018862	1.2452	1.03347	O=C(c1cc2n(n1)c(cc(n2)c1ccccc1)C(F)(F)F)N1CCc2c(C1)cccc2
NDL	ST018944	1.54813	1.21337	O=C(c1nn2c(c1Br)nc(cc2C(F)(F)F)c1ccccc1)N1CCc2c(C1)cccc2
NDL	ST018956	1.25845	0.991709	Brc1ccc(cc1)c1cc(n2c(n1)c(cn2)C(=O)N1CCc2c(C1)cccc2)C(F)(F)F
NDL	ST019060	1.50827	1.09997	COc1ccc(cc1NC(=O)C(=O)NCc1ccccc1)C
NDL	ST019200	1.26488	1.01447	O=C(CCC(=O)O)NCCc1c[nH]c2c1cccc2
NDL	ST019346	1.21061	1.17289	NC(=S)N/N=C/c1c(O)c(O)c(c2c1cc(O)c(c2C)c1c(C)cc2c(c1O)c(/C=N/NC(=S)N)c(c(c2C(C)C)O)O)C(C)C
NDL	ST019380	0.776396	0.791046	COc1cccc(c1)Nc1ncnc2c1nc[nH]2
NDL	ST019494	1.2465	1.02225	O=C(Nc1ccc(c(c1)C)c1cc2ccccc2oc1=O)COc1ccc(c(c1)C)Cl
NDL	ST019500	0.97874	0.608829	O=C(/C=C/c1ccccc1)OCCN(C1=NS(=O)(=O)c2c1cccc2)c1ccccc1Cl
NDL	ST019600	1.63226	1.20318	OC(=O)C1C2C=CC(C1C(=O)N1CCc3c(C1)cccc3)C2
NDL	ST019653	1.42917	0.749386	Cc1cc(=O)n(c2c1cccc2)C
NDL	ST019686	1.55859	1.11655	O=C1ON=C(/C/1=C/c1ccc2c(c1)OCO2)c1ccc(c(c1)C)C
NDL	ST019691	1.01081	0.665964	CCCCOc1ccc(cc1)C1=NOC(=O)/C/1=C\c1ccccc1
NDL	ST019694	1.89781	1.27438	CCCCOc1ccc(cc1)C1=NOC(=O)/C/1=C\c1cccc(c1O)[N+](=O)[O-]
NDL	ST019695	1.12695	0.749766	CCCCOc1ccc(cc1)C1=NOC(=O)/C/1=C\c1ccc(cc1O)OCC
NDL	ST019697	1.8594	1.24329	CCCCOc1ccc(cc1)C1=NOC(=O)/C/1=C\C=C\c1ccccc1
NDL	ST019740	0.91244	0.697295	CCCCCOc1ccc(cc1)C1=NOC(=O)/C/1=C\c1cc(ccc1O)[N+](=O)[O-]
NDL	ST019742	1.89713	1.18788	CCCCCOc1ccc(cc1)C1=NOC(=O)/C/1=C\c1cc(Cl)ccc1O
NDL	ST019743	1.19782	0.841721	CCCCCOc1ccc(cc1)C1=NOC(=O)/C/1=C\c1ccc(cc1)OCCCC
NDL	ST019771	1.46953	1.14819	COc1cc(ccc1OC)C1=NOC(=O)/C/1=C\c1cccc(c1O)[N+](=O)[O-]
NDL	ST019809	0.999918	0.735707	COc1cc(cc(c1OC)OC)C1=NOC(=O)/C/1=C\c1ccc(cc1Cl)Cl
NDL	ST019810	2.2471	1.22477	COc1cc(cc(c1OC)OC)C1=NOC(=O)/C/1=C\c1ccc(cc1)Br
NDL	ST019811	0.799439	0.995647	COc1cc(cc(c1OC)OC)C1=NOC(=O)/C/1=C\c1cccc(c1)[N+](=O)[O-]
NDL	ST019823	1.12609	1.09005	COc1cc(cc(c1OC)OC)C1=NOC(=O)/C/1=C\c1sccc1C
NDL	ST020202	0.938648	0.989636	COc1cc(ccc1OC)C(=O)NC1CCCCCC1
NDL	ST020536	1.36831	1.22467	Brc1ccc(cc1)C1=NOC(=O)/C/1=C\c1ccc2c(c1)OCO2
NDL	ST020706	1.27873	1.22139	OC(=O)CNC(=O)c1ccccc1F
NDL	ST020714	1.10662	1.1228	CCOc1ccc(cc1)C=C(C#N)C#N
NDL	ST020838	1.50238	1.1381	Oc1ccc(cc1)/C=C/1\C(=O)ON=C1c1ccccc1
NDL	ST021016	1.78513	1.2007	OC(=O)C(Cc1ccc(cc1)[N+](=O)[O-])N.Cl
NDL	ST021061	1.39253	1.138	OC(=O)C(NS(=O)(=O)c1ccc(cc1)C)Cc1ccccc1
NDL	ST021133	1.55417	1.18723	Oc1ccc2c(c1CN1CCCCC1)occ(c2=O)c1ccccc1
NDL	ST021156	1.32143	1.10335	Brc1ccccc1OCC1CCC[N+]2(C1CCCC2)C.[I-]
NDL	ST021182	1.30775	1.16232	Cc1cccc(c1)N1C(=O)NC(=O)/C(=C\c2cn(c3c2cccc3)C)/C1=O
NDL	ST021190	1.1199	1.08739	Brc1ccc(cc1)N1C(=O)NC(=O)/C(=C\c2c[nH]c3c2cccc3)/C1=O
NDL	ST022015	1.35936	1.15738	O=C(CNc1n[nH]c(=O)[nH]c1=O)N/N=C/c1ccc(cc1)N(C)C
NDL	ST022034	2.21721	1.00014	CCOc1ccccc1/C=N/NC(=O)CNc1n[nH]c(=O)[nH]c1=O
NDL	ST022146	1.12203	1.27424	O=C(Cc1n[nH]c(=O)[nH]c1=O)N/N=C/c1c(O)ccc2c1cccc2
NDL	ST022345	1.35162	0.671802	O=C(N/N=C/c1c[nH]c2c1cccc2)CCNc1n[nH]c(=O)[nH]c1=O
NDL	ST022366	1.48244	1.10246	COc1cc(/C=N/NC(=O)CCNc2n[nH]c(=O)[nH]c2=O)ccc1OCc1ccccc1
NDL	ST022376	0.742403	0.729075	O=C(C(Nc1n[nH]c(=O)[nH]c1=O)C)N/N=C/c1ccccc1
NDL	ST022472	1.28947	1.11417	O=C(Cc1n[nH]c(=O)[nH]c1=O)N/N=C/c1cccc(c1)[N+](=O)[O-]
NDL	ST022487	0.902331	0.770147	O=C(N/N=C/c1cccnc1)CCNc1n[nH]c(=O)[nH]c1=O
NDL	ST022497	1.91053	1.15893	O=C(C(Nc1n[nH]c(=O)[nH]c1=O)C)N/N=C/c1ccncc1
NDL	ST022505	1.43771	0.666068	O=C(Cc1n[nH]c(=O)[nH]c1=O)N/N=C/c1ccccc1[N+](=O)[O-]
NDL	ST022512	1.84084	1.21462	O=C(Cc1n[nH]c(=O)[nH]c1=O)N/N=C/c1ccc(cc1)N(C)C
NDL	ST022518	0.975875	0.769318	O=C(C(Nc1n[nH]c(=O)[nH]c1=O)C)N/N=C/c1cccc(c1)C
NDL	ST022520	2.15097	1.20923	O=C(CNc1n[nH]c(=O)[nH]c1=O)N/N=C/c1ccc(cc1)C(F)(F)F
NDL	ST022533	1.11001	0.757919	COc1cc(/C=N/NC(=O)CNc2n[nH]c(=O)[nH]c2=O)ccc1O
NDL	ST022660	1.73839	1.14584	Clc1ccc(cc1)c1nc(Nc2ccc3c(c2)OCCO3)c2c(n1)cccc2.Cl
NDL	ST022689	0.450531	0.675532	Cc1ccc(cc1)N1COc2c(C1)c1oc(=O)cc(c1cc2)C
NDL	ST023393	1.49188	1.27814	COc1ccc(cc1)C(=O)NC(C(=O)O)Cc1cnc[nH]1
NDL	ST023394	0.909879	0.665446	O=C(NC(C(=O)O)Cc1ccccc1)COc1ccc(cc1)C
NDL	ST023411	1.3722	1.17334	COc1cc(cc(c1OC)OC)C(=O)NC(C(=O)O)C(C)C
NDL	ST023485	0.764911	1.02643	OC(=O)CCCC(C(=O)O)N
NDL	ST023486	1.18991	1.09917	NC(C(=O)N)CC(C)C.Cl
NDL	ST023895	1.08743	1.06428	OC(=O)C(=O)c1ccccc1C(=O)O
NDL	ST023898	0.964876	1.1655	COc1ccccc1c1c(=O)c2ccc(c(c2oc1C(F)(F)F)CN1CC(C)OC(C1)C)O
NDL	ST023941	0.407362	0.521503	O=C(c1ccc(cc1)CN1CCc2c(C1)cccc2)N/N=C/c1cc(n(c1C)c1ccccc1F)C
NDL	ST023988	1.4808	1.07026	CC(=O)O/C(=C\c1cn(c2c1cccc2)C(=O)C)/C(=O)O
NDL	ST023990	1.2411	1.0933	OC(=O)C(Cc1c[nH]c2c1cccc2)NC(=O)c1ccco1
NDL	ST024009	1.52289	1.20795	O=C1Nc2c(/C/1=N\N=C(\c1c(O)c3ccccc3n(c1=O)c1ccccc1)/C)cccc2
NDL	ST024059	1.30806	1.0913	CC(=O)OC1C2OC(=O)C(C2OC1n1ccc(=O)[nH]c1=O)OC(=O)C
NDL	ST024082	1.34957	1.17289	O=C(c1ccccc1Br)OC1C(OC(=O)c2ccccc2Br)C(OC1n1cnc2c1ncnc2NC(=O)c1ccccc1)COC(=O)c1ccccc1Br
NDL	ST024083	1.27319	1.12415	Clc1ccc(c(c1)Cl)C(=O)OC1C(OC(=O)c2ccc(cc2Cl)Cl)C(OC1n1cnc2c1ncnc2NC(=O)c1ccccc1)COC(=O)c1ccc(cc1Cl)Cl
NDL	ST024086	1.54544	1.1637	OCC1OC(C(C1O)O)n1cnc2c1nc(NC(=O)C(N1C(=O)c3c(C1=O)cccc3)Cc1ccccc1)[nH]c2=O
NDL	ST024093	1.00224	0.896749	CN(CCCNc1nc(nc2c1cccc2)c1ccc(cc1)Cl)C
NDL	ST024094	1.27531	1.12919	CCN(CCCNc1nc(nc2c1cccc2)c1ccc(cc1)Cl)CC
NDL	ST024097	0.858162	0.613527	OC(=O)c1ccc(cc1)Nc1nc(nc2c1cccc2)c1ccc(cc1)C(C)(C)C.Cl
NDL	ST024144	1.37578	1.12487	CCC(C(C(=O)O)NC(=O)C)C
NDL	ST024291	0.623713	0.801643	COC(=O)CNC(=O)c1ccc(cc1Cl)Cl
NDL	ST024321	1.27251	1.27201	N#CC1=C(N)Oc2c(C1c1cccc(c1)Br)c(=O)oc1c2cccc1
NDL	ST024425	0.76179	1.13974	CCN1C(=O)NC(C(=C1C)C(=O)OC(C)C)c1cc(Br)c(c(c1)OC)O
NDL	ST024453	0.841854	1.09793	COc1ccc(cc1)C1CC(=O)C2=C(C1)Nc1ccccc1NC2c1ccncc1
NDL	ST024514	0.857245	1.11797	COc1ccc(cc1)C1CC(=O)C2=C(C1)Nc1ccccc1NC2c1c(F)cccc1Cl
NDL	ST024526	1.05533	0.911478	CC(Oc1ccccc1C1Nc2ccccc2NC2=C1C(=O)CC(C2)c1ccc(cc1)Cl)C
NDL	ST024529	0.566218	0.59103	COC(=O)c1ccc(cc1)C1CC(=O)Nc2c1cc(Br)c1c2cccc1
NDL	ST024545	1.28376	1.64046	CCOC(=O)c1c(NC(=O)c2cc(OC)c(c(c2)OC)OC)sc(c1C)C(=O)Nc1cc(ccc1Cl)C(F)(F)F
NDL	ST024567	0.791463	0.979428	COc1cc(ccc1OC)C1CC(=O)C2=C(C1)Nc1ccccc1NC2c1cc(Br)c(c(c1)OC)O
NDL	ST024574	1.33126	0.848227	COC(=O)C1=C(C)NC2=C(C1c1cc(OC)c(c(c1)OC)OC)C(=O)CC(C2)c1ccc(c(c1)OC)OC
NDL	ST024596	0.461292	0.514231	Nc1ccc(cn1)C1CCC[N+]1(C)Cc1ccccc1.[I-]
NDL	ST024605	1.02448	1.18699	Cc1ccc2c(c1)c(=O)c(co2)c1nc(c([nH]1)c1ccccc1)c1ccccc1
NDL	ST024616	0.735744	0.983139	Clc1ccc2c(c1)c(c1cnn(c1)c1ccccc1)c(c(=O)o2)c1ccccc1
NDL	ST024723	0.896981	0.956091	CCOC(=O)CC[C@H]([C@H]1CC[C@@H]2[C@]1(C)[C@@H](O)C[C@H]1[C@H]2[C@H](O)C[C@H]2[C@]1(C)CC[C@H](C2)O)C
NDL	ST024725	0.675881	0.938114	CCOC(=O)CC[C@H]([C@H]1CC[C@@H]2[C@]1(C)[C@@H](O)C[C@H]1[C@H]2CC[C@H]2[C@]1(C)CC[C@H](C2)O)C
NDL	ST024735	4.86517	0.876925	CNCC(c1cccc(c1)O)O
NDL	ST024746	1.3158	1.19474	OCC(=O)C12OC(OC1C[C@@H]1C2(C)CC(O)[C@]2([C@H]1C[C@@H](C1=CC(=O)C=CC21C)F)F)(C)C
NDL	ST024767	1.25409	1.16555	[Na]OS(=O)(=O)c1cccc(c1)C(=O)OCC(=O)[C@@]1(O)[C@H](C)CC2[C@]1(C)C[C@H](O)[C@]1(C2CCC2=CC(=O)C=C[C@]12C)F
NDL	ST024776	0.980005	1.19441	O=C(N[C@@H]1C(=O)N2[C@@H]1SC([C@@H]2C(=O)O)(C)C)Cc1ccccc1.CCN(CCOCc1ccc(cc1)N)CC.O
NDL	ST024782	0.863757	0.974975	CO[C@H]1/C=C/O[C@@]2(C)Oc3c(C2=O)c2c(O)c(/C=N\N4CCN(CC4)C)c(c(c2c(c3)O)O)NC(=O)/C(=C\C=C\[C@@H](C([C@H]([C@H]([C@H]([C@@H]([C@H]1OC)OC(=O)C)C)O)C)O)C)/C
NDL	ST024784	0.293099	0.308251	BrCC(=C)C1Oc2c(C1)c1OC3COc4c(C3C(=O)c1cc2)cc(c(c4)OC)OC
NDL	ST024793	0.903493	1.05224	COc1ccccc1c1oc2ccccc2c(=O)c1OC(=O)c1cccs1
NDL	ST024948	1.04172	0.972006	NC(C(=O)O)Cc1ccc(cc1)F
NDL	ST024949	0.909413	1.14526	OC(=O)C(Cc1cccc(c1)F)N
NDL	ST024950	1.47371	1.3351	OC(=O)C(Cc1ccccc1F)N
NDL	ST025067	0.971717	1.07261	OCC1OC(C(C1O)O)n1c(N/N=C\c2ccc(c(c2)[N+](=O)[O-])Br)nc2c1nc(N)[nH]c2=O
NDL	ST025090	0.933757	0.932918	Cc1ccc(cc1)C(=O)OCC1OC(C(C1OC(=O)c1ccc(cc1)C)OC(=O)C)n1cc(I)c(=O)[nH]c1=O
NDL	ST025103	0.962246	1.28422	Cn1c(NCCOc2ccc(cc2)C(C)(C)C)nc2c1c(=O)n(c(=O)n2C)C
NDL	ST025230	1.0008	1.28817	COC(=O)C(CCCNC(=N)N[N+](=O)[O-])N.Cl
NDL	ST025236	0.825797	0.998395	CC(=O)NC(C(=O)O)C
NDL	ST025428	0.879222	0.521958	Cc1ccc(cc1)C(=O)CC(C(=O)O)NCc1ccccc1.Cl
NDL	ST025481	0.832975	1.14914	COc1c(CSc2nnnn2c2ccccc2)c2C(=O)OCc2c(c1OC)OC
NDL	ST025534	0.62253	0.806195	COc1ccc(c(c1OC)OC)C(=O)Nc1ccccc1C(=O)N1CCCCC1C
NDL	ST025539	1.10461	1.15664	CCOC(=O)c1c(C)n(c2c1cc(O)cc2)CCOc1ccccc1Cl
NDL	ST025549	0.896389	0.730378	O=C(ON1C(=O)CCC1=O)/C=C/c1ccccc1
NDL	ST025561	0.75883	1.15013	O=c1[nH]c(=O)[nH]nc1SCCOS(=O)(=O)O
NDL	ST025581	0.660416	0.728902	CC(=O)/C=C(/NC(C(=O)O)C)\C
NDL	ST025591	0.996654	1.37847	NC(=O)CC(C(=O)O)NSc1ccccc1[N+](=O)[O-]
NDL	ST025615	1.01974	0.832807	CC(C(C(=O)O)Nc1ncnc2c1cccc2)C
NDL	ST025699	1.10217	0.997488	O=C(c1ccc2c(c1)OCO2)Oc1cccc(c1)/C=N/NC(=O)C(c1ccccc1)(c1ccccc1)O
NDL	ST026111	0.818101	1.06519	Cc1ccc(cc1)c1nc2ccccc2c(c1)C(=O)O.NCCc1ccc(cc1)OC
NDL	ST026255	0.949148	1.04202	O=C(/C=C/c1ccccc1)OCC(=O)Nc1ccccc1
NDL	ST026551	0.768302	1.00458	CSCCC(C(=O)O)NS(=O)(=O)c1ccc(cc1)C
NDL	ST026815	0.602921	0.953534	N#C/C(=C/c1ccc(c(c1)OC)O)/C(=O)Nc1ccc(cc1)O
NDL	ST026921	0.607656	0.869421	COc1ccc(cc1)/C=C\1/N=C(N(C1=O)Nc1nc(nc(n1)Nc1ccc(cc1O)[N+](=O)[O-])Nc1ccc(cc1O)[N+](=O)[O-])c1ccccc1
NDL	ST026922	0.697784	0.839156	Oc1ccc(cc1)/C=C\1/N=C(N(C1=O)Nc1nc(nc(n1)Nc1ccc(cc1O)[N+](=O)[O-])Nc1ccc(cc1O)[N+](=O)[O-])c1ccccc1
NDL	ST026946	0.419262	0.525883	OCC1OC(Nc2cc(ccc2NC(=O)C)NC(=O)C)C(C(C1OC1OC(CO)C(C(C1O)O)O)O)O
NDL	ST027058	1.37633	1.31473	COc1cc(cc(c1OC)OC)C(=O)Sc1ccc(cc1)Cl
NDL	ST027168	0.886326	1.15269	O=C(NNC(=O)c1cc2cc(Br)ccc2oc1=O)COc1cccc(c1)Cl
NDL	ST027326	0.902309	1.01596	ClC1=C(NC2CCN(CC2)Cc2ccccc2)C(=O)c2c(C1=O)cccc2
NDL	ST027385	0.927246	1.19012	Cc1ccc2c(c1)oc(n2)c1ccc(c(c1)NC(=O)c1ccc2c(c1)OCCO2)C
NDL	ST027388	0.822245	1.09001	Clc1ccc(cc1Cl)n1c(CSc2ncnc3c2nc[nH]3)nc2c(c1=O)cccc2
NDL	ST027415	0.523523	1.02008	Cc1ccccc1Nc1nc(Nc2ccccc2C)c2c(n1)cccc2
NDL	ST027493	1.09566	1.15904	OC(c1ccccc1)CNc1nc2c(n1C)c(=O)n(c(=O)n2C)C
NDL	ST027509	1.19178	1.30178	N#C/C(=C\c1cn(c2c1cccc2)CCOc1cc(C)ccc1C)/C(=O)N1CCc2c(C1)cccc2
NDL	ST027530	0.639105	1.10345	COc1cc(ccc1OC)C(=O)Nc1ccc(cc1)c1nc2c(o1)c(Cl)cc(c2)Cl
NDL	ST027561	1.10461	1.32792	COc1ccc2c(c1)c(CC(=O)NCc1ccc(cc1)OC)c(n2C(=O)c1ccc(cc1)Cl)C
NDL	ST027719	0.701927	1.1371	C=CCN1C(=O)NC(=O)C(C1=O)Cc1ccc(c(c1)OC)OC
NDL	ST028394	1.02744	1.2255	CCOc1ccc2c(c1/C=N/NC(=O)COc1cc(C)ccc1C(C)C)cccc2
NDL	ST028455	0.323881	1.20909	Cc1ccc(cc1)OCCSc1ncnc2c1nc[nH]2
NDL	ST028624	1.0079	1.20612	OC(=O)C1NCCc2c1cccc2
NDL	ST028626	1.39949	0.980912	Brc1cnc(c(c1)C1CCC[N+]1(C)C)N.[I-]
NDL	ST028644	1.10994	0.996993	Nc1nc(=O)[nH]cc1F
NDL	ST028708	1.29567	1.18815	O=C(c1cc(nc2c1cccc2)c1ccc(c(c1)Cl)Cl)N1CCc2c(C1)cccc2
NDL	ST028777	0.754095	0.824123	CC(=O)Oc1ccc2c(c1)oc(=O)c1c2oc2c1cc(c(c2)OC(=O)C)OC(=O)C
NDL	ST028823	0.956326	1.23705	CC(CCCn1c(=O)[nH]c(=O)c(c1O)C(c1c(=O)[nH]c(=O)n(c1O)CCCC(C)C)c1ccccn1)C
NDL	ST029018	0.425774	0.733586	CC(CC(n1c(=O)c2cccc3c2c(c1=O)ccc3)C(=O)O)C
NDL	ST029234	1.15619	1.34524	Clc1ccc(c(c1)Cl)NC(=O)C1CC2C3C1CCC(C2)C3
NDL	ST029446	1.63879	0.979181	O=C(N[C@H](C(=O)O)CC(=O)NC(c1ccccc1)(c1ccccc1)c1ccccc1)OCC1c2ccccc2c2c1cccc2
NDL	ST029463	0.490372	0.961946	O=C(c1ccc2c(c1)OCCO2)Nc1ccc2c(c1)nc(o2)c1ccccc1Cl
NDL	ST029579	0.953292	0.943144	COc1cc(OC)cc(c1)C(=O)Nc1ccc2c(c1)nc(o2)c1ccccc1Cl
NDL	ST029634	0.656864	0.978686	O=C(Cn1cnc2c1c(=O)n(C)c(=O)n2C)Nc1nc2c(s1)cccc2
NDL	ST029675	1.09625	0.802649	COc1cccc(c1O)/C=N/c1ccc2c(c1)nc1c(c2)ccc(c1)/N=C/c1cccc(c1O)OC
NDL	ST029711	1.03158	1.07616	COc1cc(ccc1OC)C(=O)Nc1ccc(cc1)OCc1ccccc1
NDL	ST029713	1.39594	1.01637	COc1cc(Cl)c(cc1NC(=O)c1cc(OC)c(c(c1)OC)OC)OC
NDL	ST029810	1.04349	1.08267	CCC(c1nc(Nc2cccc(c2)C(=O)C)c2c(n1)cccc2)CC
NDL	ST029812	1.17698	0.962935	CCC(c1nc(Nc2ccc(cc2)C(=O)OC)c2c(n1)cccc2)CC
NDL	ST029852	0.715543	1.012	O=C(C(C)C)Oc1ccc2c(c1)occ(c2=O)Oc1ccc2c(c1)cccc2
NDL	ST029862	0.371239	0.558984	CCc1cccc(c1Nc1ncnc2c1cc(Br)cc2)C.Cl
NDL	ST029877	1.02684	1.28265	O=C(Nc1ccc(cc1)C)COc1ccc2c(c1)occ(c2=O)Oc1ccc(cc1)C(C)(C)C
NDL	ST029879	1.02566	0.991303	COc1cc(cc(c1OC)OC)C(=O)OCc1ccccc1Cl
NDL	ST029892	0.828239	1.20142	CCC(c1nc(Nc2ccc(c(c2)Cl)C)c2c(n1)cccc2)CC
NDL	ST029917	1.14376	1.13042	CCCCOC(=O)Cn1cnc2c(c1=O)cc(cc2)Br
NDL	ST029993	0.785543	1.09306	COc1cc(ccc1OC)C(=O)NCCOc1cc(C)cc(c1)C
NDL	ST030091	0.985333	1.12325	COc1cc(cc(c1OC)OC)C(=O)NC(C(=O)O)Cc1ccccc1
NDL	ST030149	0.898165	1.11187	CCC(=O)Oc1ccc(cc1OC)/C=C/c1ccccc1
NDL	ST030406	1.07494	1.22583	COc1cc(/C=N\Nc2scc(n2)c2cccc(c2)[N+](=O)[O-])cc(c1O)OC
NDL	ST030492	1.16685	1.00268	COc1cc(/C=N\Nc2scc(n2)c2ccc(cc2)Br)cc(c1OC)OC
NDL	ST030518	1.00198	1.26533	CC(CCOC(=O)COc1ccc2c(c1)occ(c2=O)Oc1ccc(cc1)C(C)(C)C)C
NDL	ST030589	0.977045	1.04928	COc1cc(ccc1OC)C(=O)Nc1ccc2c(c1)nn(n2)c1ccccc1
NDL	ST030874	1.20902	1.2796	O=C1ON=C(/C/1=C/c1ccc2c(c1)OCO2)c1ccccc1
NDL	ST030885	0.77363	1.24414	O=C(c1c(C)cc(cc1C)C)NCC(=O)O
NDL	ST031151	1.04053	1.17644	COC(=O)c1ccc(cc1)NC(=S)N/N=C/c1cc(OC)c(c(c1)OC)OC
NDL	ST031276	0.836526	1.10362	Brc1ccc(cc1)C(=O)Nc1cccc(c1)/C=C/C(=O)c1cccc(c1)NC(=O)c1ccc(cc1)Br
NDL	ST031278	0.910596	1.08968	O=C(c1cc(cc(c1)NC(=O)C(c1ccccc1)c1ccccc1)NC(=O)C(c1ccccc1)c1ccccc1)Nc1ccc(cc1)/C=C/C(=O)c1ccccc1
NDL	ST031283	0.99547	1.26409	O=C(c1cc(cc(c1)N1C(=O)c2c(C1=O)cccc2)N1C(=O)c2c(C1=O)cccc2)Nc1ccc(cc1)/C=C/C(=O)c1ccccc1
NDL	ST031410	1.04645	0.852351	Clc1ccc(cc1)C(=O)c1c2c(=O)n(c(=O)c2cc2c1c(=O)n(c2=O)c1ccc(cc1)/C=C/C(=O)c1ccccc1)c1ccc(cc1)/C=C/C(=O)c1ccccc1
NDL	ST031841	1.22797	1.20653	CCOc1cc(cc(c1OCC)OCC)C(=O)Nc1c(C)cccc1C
NDL	ST031858	0.745215	1.12102	CCOc1cc(ccc1OCC)C(=O)Nc1ccc(cc1)Br
NDL	ST032067	1.11113	0.98083	COc1ccc(cc1)C(=O)[C@@H]1[C@H]2C3COC(O3)C(=O)[C@@H]2[C@@H]2N1c1ccccc1C=C2
NDL	ST032140	0.76475	0.926486	COCCN1C(=C(/C(=C/c2cc(OC)c(c(c2)OC)OC)/C1=O)C(=O)OC)C
NDL	ST032169	1.08145	1.0228	N#CC1=C(N)Oc2c(C1c1ccccc1F)c(=O)[nH]c(=O)[nH]2
NDL	ST032199	0.657456	0.89482	COC(=O)CNC(=O)CN(S(=O)(=O)c1ccccc1)c1ccc(cc1OC)OC
NDL	ST032221	1.31994	0.974233	COc1cc(cc(c1OC(=O)C)OC)/C=c\1/sc2n(c1=O)c1c(n2)cccc1
NDL	ST032227	1.13599	0.877337	N#CC1=C(N)Oc2c(C1c1cc(OC)c(c(c1)OC)OC)c(=O)oc1c2cccc1
NDL	ST032388	0.857245	1.06973	COc1cc(C2CC(=O)NC(=C2C(=O)OC(C)C)C)c(c(c1OC)OC)Br
NDL	ST032423	1.72433	0.965079	CCOc1cc(cc(c1O)[N+](=O)[O-])C1C(=C(N)OC2=C1C(=O)CC(C2)(C)C)C#N
NDL	ST032483	1.84132	0.980583	CCOc1cc(cc(c1OCC)OCC)C(=O)Nc1ccc(c(c1)OC)OC
NDL	ST032713	0.449453	0.965244	CCCCCOC(=O)C1=C(C)N(C)C(=O)NC1c1cc(Cl)c(c(c1)OC)O
NDL	ST032792	2.75998	0.999797	CC1CCCC(N1Cc1c(O)ccc2c1oc(=O)cc2c1ccccc1)C
NDL	ST033105	0.503988	0.85466	COc1ccc(cc1Cn1cnc(n1)[N+](=O)[O-])/C=N/NC(=O)c1cc(O)c(c(c1)O)O
NDL	ST033161	0.985333	1.02643	CCN(Cc1nnn(c1C(=O)N/N=C/c1cc(OC)c(c(c1)OC)OC)c1nonc1N)CC
NDL	ST033261	1.23633	1.08251	N#CCc1ccc(cc1)NC(=O)c1ccc(c(c1)OC)OC
NDL	ST033513	1.09566	1.13438	O=C(C1CCCN1c1scc(n1)c1ccc(cc1)F)OCc1ccccc1
NDL	ST033568	1.49864	1.22707	COc1cc(cc(c1OC)OC)c1nnc(n1c1ccccc1)SCC(=O)N/N=C/c1cccnc1
NDL	ST033644	1.23751	0.990396	[O-][N+](=O)OCCC12C(I)C3C4C1C1C(C2C3C1C4)I
NDL	ST033653	1.12356	1.29617	COCC(=O)OCC1CCC[N+]2(C1CCCC2)C.[I-]
NDL	ST034022	0.716135	1.01744	CCCCCOc1ccc(cc1)NC(=O)C(=O)NCc1ccc(cc1)OC
NDL	ST034078	0.759422	1.2166	COc1cc(cc(c1OC)OC)C(=O)Nc1ccccc1C(=O)Nc1ccccc1
NDL	ST034244	1.03099	1.07204	Clc1ccc2c(c1)c(c1ccccc1)c(c(=O)[nH]2)Sc1nc2c([nH]1)cccc2
NDL	ST034338	0.792055	1.25577	COc1cc(/C=N/NC(=O)c2ccccc2N)ccc1O
NDL	ST034726	0.842446	1.07171	COc1cc(/C=C/C(=O)Nc2cccc(c2)C(=O)C)ccc1OC
NDL	ST034727	5.78931	1.09834	COc1cc(/C=C/C(=O)Nc2cccc3c2cccc3)ccc1OC	AGONIST
NDL	ST034730	1.11527	1.03072	COC(=O)c1ccc(cc1)NC(=O)/C=C/c1ccc(c(c1)OC)OC
NDL	ST034732	1.00731	1.25494	COc1ccc(cc1)NC(=O)/C=C/c1ccc(c(c1)OC)OC
NDL	ST034733	0.946189	1.08581	COc1cc(/C=C/C(=O)Nc2ccc(cc2)NC(=O)C)ccc1OC
NDL	ST034735	1.06066	1.07327	COc1ccc(cc1OC)/C=C/C(=O)Nc1ccc(cc1)C(=O)C
NDL	ST035320	0.792647	1.06338	COc1cc(cc(c1OC)OC)C(=O)N/N=C/c1ccc2c(c1)c1ccccc1n2CC
NDL	ST035419	1.07553	1.25964	O=C1NC(=O)C(=NNc2cccc(c2C)[N+](=O)[O-])C(=O)N1
NDL	ST035454	0.95751	1.06857	O=C1NC(=O)C(=NNc2cc(ccc2O)[N+](=O)[O-])C(=O)N1
NDL	ST035473	0.802118	1.1225	COc1cc(cc(c1OC)OC)C(=O)Nc1cccc(c1)C#N
NDL	ST035612	0.924878	1.10774	C=CC[C@@H]1N[C@@H](CC=C)Cc2c1c(Br)c(cc2Br)Br
NDL	ST035691	0.898165	1.07839	Clc1cccc(c1)/C=C/C(=O)c1ccc(cc1)c1ccccc1
NDL	ST035963	0.691272	1.01085	O=C(c1cc(O)cc(c1)O)N/N=C/c1ccc(cc1)/C=N/NC(=O)c1cc(O)cc(c1)O
NDL	ST036586	0.578058	1.22509	O=C1NC(=O)C(=NNc2cccc(c2)[N+](=O)[O-])C(=O)N1
NDL	ST036601	1.18645	1.03946	O=C1NC(=O)C(=NNc2ccccc2[N+](=O)[O-])C(=O)N1
NDL	ST036717	1.05237	1.01728	COc1cc(C=O)ccc1OC(C)C
NDL	ST037127	0.642064	1.14304	N#CC1=C(N)Oc2c(C1c1cc(OC)c(c(c1)OC)OC)c([nH]n2)c1ccccc1
NDL	ST037249	0.96343	0.989241	COc1cc(cc(c1OC)OC)C(=O)Nc1ccc(cc1)CN1CCCC1
NDL	ST037252	1.26297	1.08309	CCOC(=O)Cn1c(nc2c1cccc2)Sc1nc2c(n1C)c(=O)n(c(=O)n2C)C
NDL	ST037435	0.821061	1.06049	COc1cc2c(cc1OC)CCNC2c1ccc(cc1)N(C)C
NDL	ST037589	1.24284	1.06882	COc1cc(cc(c1OC)OC)C(=O)Nc1cc(C)c(c(c1)C)OCC(=O)N1CCOCC1
NDL	ST037628	0.553195	0.818771	COC(=O)c1nc(C)c2c(c1)c1ccccc1[nH]2
NDL	ST037716	0.908821	1.11409	CC(=O)NC(C(=O)NC1CC1)Cc1c[nH]c2c1cccc2
NDL	ST037730	1.15027	1.24702	COC(=O)C1=CN(C=C(C1c1cc(OC)c(c(c1)OC)OC)C(=O)OC)Cc1ccc(cc1)F
NDL	ST037733	1.29323	1.09463	COC(=O)C1=CN(Cc2ccccc2)C=C(C1c1cc(OC)c(c(c1)OC)OC)C(=O)OC
NDL	ST037793	0.955734	1.20761	COC(=O)C1=CN(C=C(C1c1cc(OC)c(c(c1)OC)OC)C(=O)OC)Cc1ccc(cc1)Cl
NDL	ST037807	0.961654	1.10205	Cc1cc(=O)n2c3c1cccc3CCC2
NDL	ST038122	1.26482	1.19491	CCOC(=O)CC(=O)c1cc(OC)c(c(c1)OC)OC
NDL	ST038325	1.18705	0.930444	COc1ccc(cc1c1oc2ccccc2c(=O)c1O)OC
NDL	ST038459	0.756463	1.24571	COC(=O)Nc1c(cc(c(c1OC)OC)OC)C(=O)OC
NDL	ST038469	1.2031	1.05653	COC(=O)CN1c2ccccc2C2(C1=O)C(=C(N)Oc1c2c(=O)oc2c1cccc2)C#N
NDL	ST038535	0.786727	1.38458	COc1ccc(cc1)c1cn2c(n1Cc1ccccn1)nc1c2c(=O)n(C)c(=O)n1C
NDL	ST038608	0.877446	1.19532	COc1ccc(cc1OC)NC(=O)c1cc(OC)c(c(c1Br)OC)OC
NDL	ST038639	1.56161	1.28009	O=c1[nH]ccc(n1)NC(=O)c1ccccc1
NDL	ST038647	1.22619	1.03608	O=C(Nc1ccc(cc1)OC(F)(F)F)CSc1nc2c(n1Cc1ccccc1F)c(=O)n(c(=O)n2C)C
NDL	ST038694	1.25349	1.22393	Cn1c(=O)n(C)c(=O)c2c1nc1n2CC(=NN1Cc1ccccc1)C12CC3CC(C2)CC(C1)C3
NDL	ST038696	0.506948	0.54626	[O-][N+](=O)C1=Cc2ccccc2OC1c1ccc2c(c1)OCO2
NDL	ST038702	0.780141	1.0205	COc1cc(cc(c1OC)OC)C(=O)NCCc1c(C)[nH]c2c1cccc2
NDL	ST038741	1.10099	0.99757	CCOc1cc2CCNC(c2cc1OC)c1ccc2c(c1)OCO2
NDL	ST038762	1.08974	1.35118	CCOc1cc2c(cc1OCC)CCNC2c1ccc2c(c1)OCO2
NDL	ST038805	0.656864	1.06486	COc1ccc(cc1)CC(=O)NCCc1c(C)[nH]c2c1cccc2
NDL	ST038806	0.433469	1.20967	O=C(COc1ccc(cc1F)F)NCCc1c(C)[nH]c2c1cccc2
NDL	ST038808	0.546609	1.06486	COc1ccc2c(c1)c(CCNC(=O)c1ccc(cc1)F)c([nH]2)C
NDL	ST038809	0.644432	1.01662	COc1ccc2c(c1)c(CCNC(=O)c1ccc(cc1)C)c([nH]2)C
NDL	ST038810	0.478533	1.00268	COc1ccc2c(c1)c(CCNC(=O)c1cc(OC)c(c(c1)OC)OC)c([nH]2)C
NDL	ST038811	0.694232	0.950483	COc1ccc2c(c1)c(CCNC(=O)c1ccc(c(c1)OC)OC)c([nH]2)C
NDL	ST038812	0.861389	1.02165	COc1ccc2c(c1)c(CCNC(=O)c1ccc(cc1)C(=O)OC)c([nH]2)C
NDL	ST038877	0.713175	1.01843	OC(=O)CNC(=O)c1cccc(c1)F
NDL	ST038990	0.680025	1.14559	Cc1ccc(cc1)OCCn1c(S)nc2c1ncnc2N
NDL	ST039046	0.968757	0.95106	OC1(CCCCC1)C1(C)NCCc2c1cccc2
NDL	ST039051	0.7316	1.14287	CCOc1cc2c(cc1OCC)CCNC2c1ccc(cc1)C(=O)O
NDL	ST039101	0.208965	0.746277	COc1cc(CNC(=O)c2ccc(cc2)C(=O)c2ccccc2)cc(c1OC)OC
NDL	ST039113	0.981781	1.1818	COc1ccc2c(c1)c(CCNS(=O)(=O)c1c(C)[nH]c(=O)[nH]c1=O)c([nH]2)C
NDL	ST039129	0.450636	0.64031	CCOc1cc(CCNC(=O)c2cc3ccccc3oc2=O)ccc1OCC
NDL	ST039132	1.16566	1.05653	CCOc1cc2c(cc1OCC)CCNC2c1ccc(cc1OC)OC
NDL	ST039147	1.27784	1.2241	OCCN1N=C(Cn2c1nc1c2c(=O)n(c(=O)n1C)C)C12CC3CC(C2)CC(C1)C3
NDL	ST039158	0.879814	1.0054	COc1ccc(cc1)S(=O)(=O)N1Cc2ccccc2CC1C(=O)NCc1ccccc1
NDL	ST039199	0.955068	1.29551	CCOc1cc(CCNC(=O)c2cc3cc(OC)ccc3oc2=O)ccc1OCC
NDL	ST039282	0.92547	1.09867	COc1cc(NC(=O)c2cc(OC)c(c(c2)OC)OC)c(cc1OC)Cc1nccc2c1cc(OC)c(c2)OC
NDL	ST039367	0.816325	1.22385	Cn1c(=O)n(C)c(=O)c2c1nc1n2cc(n1Cc1ccccc1)C12CC3CC(C2)CC(C1)C3
NDL	ST039370	0.722646	1.19969	Cn1c(=O)n(C)c(=O)c2c1nc1n2cc(n1Cc1ccccn1)C12CC3CC(C2)CC(C1)C3
NDL	ST039371	1.07909	1.14502	CCOc1cc(ccc1OCC)CCn1c2nc3c(n2cc1C12CC4CC(C2)CC(C1)C4)c(=O)n(c(=O)n3C)C
NDL	ST039378	1.29745	1.06692	Nc1nc(COc2nc3c(n2Cc2ccc(cc2)C)c(=O)n(c(=O)n3C)C)nc(n1)N1CCOCC1
NDL	ST039414	0.529442	1.19573	CCOc1ccccc1C(=O)NCCc1c(C)[nH]c2c1cccc2
NDL	ST039480	1.1556	1.19491	N#CCCOCCC#CCN1CCCCC1c1cccnc1
NDL	ST039608	1.1129	1.27828	CCOC(=O)CCC(=O)Nc1cccc(c1)C(=O)C
NDL	ST039659	0.902309	1.17124	CCOC(=O)CCC(=O)Nc1ccccc1C(=O)N
NDL	ST039857	0.84067	1.15788	NCc1ccc2c(c1)c(C)c([nH]2)C
NDL	ST039880	1.01382	1.22905	Cc1ccc2c(c1)c1C[N+](C)(C)CCc1n2C.[I-]
NDL	ST039913	0.91178	1.10568	O=C(C[C@@H](C(=O)O)NC(=O)OC(C)(C)C)OCc1ccccc1
NDL	ST040023	1.35206	1.02462	COc1ccc(cc1)CC(=O)NNC(=O)CCC(=O)O
NDL	ST040110	1.08264	1.39653	COc1cc(cc(c1OC)OC)C(=O)NC1CCCCC1NC(=O)c1cc(OC)c(c(c1)OC)OC
NDL	ST040237	0.832383	0.857958	OC(=O)C1NCc2c(C1)cccc2.Cl
NDL	ST040658	0.942045	1.19153	OC(=O)c1cccc(n1)C(=O)O
NDL	ST040664	1.00613	1.09067	OCCCNC(=O)C(=O)NCCCO
NDL	ST040822	0.994878	0.915518	COc1cc(cc(c1OC)OC)C(=O)NNC(=O)CCCCCCCC(=O)NNC(=O)c1cc(OC)c(c(c1)OC)OC
NDL	ST040829	0.636145	1.0675	COc1c(OC)cc(cc1OC)C(=O)NCC(NC(=O)c1cc(OC)c(c(c1)OC)OC)C
NDL	ST040847	0.586937	1.00491	COc1cc(cc(c1OC)OC)C(=O)Nc1ccccc1NC(=O)c1cc(OC)c(c(c1)OC)OC
NDL	ST041015	1.16033	1.22509	OC[C@H]1OC(C[C@@H]1O)n1cc(I)c(=O)[nH]c1=O
NDL	ST041612	0.515235	1.18213	C/C(=C\COc1ccc2c(c1)oc(=O)cc2)/CC/C=C(/CCC(=O)C(O)(C)C)\C
NDL	ST041789	0.996062	1.11286	CCc1cccc2c1[nH]c(c2CCNC(=O)c1ccccc1OC)C
NDL	ST041792	1.13658	0.988499	O=C(COc1ccc(cc1F)F)NCCc1c(C)[nH]c2c1cc(OCc1ccccc1)cc2
NDL	ST041796	0.800342	1.27218	COc1ccccc1C(=O)NCCc1c(C)[nH]c2c1c(F)ccc2C
NDL	ST041880	0.585161	0.798304	COc1ccc(cc1)/C=C(/C(=O)NCCc1c(C)[nH]c2c1cccc2)\NC(=O)c1ccc(cc1)Br
NDL	ST041929	1.08382	1.37707	N#C/C(=C\c1c[nH]c2c1cccc2)/C(=O)N1CCc2c(C1)cccc2
NDL	ST041930	0.527666	0.797702	N#C/C(=C\c1ccc(o1)c1ccc(c(c1)Cl)Cl)/C(=O)N1CCc2c(C1)cccc2
NDL	ST041931	1.23574	1.31184	N#Cc1cn(c2c1cccc2)CC(=O)NCCc1c[nH]c2c1cccc2
NDL	ST042040	1.20725	1.23746	Clc1ccc(cc1)OCCNc1nc2c(n1C)c(=O)n(c(=O)n2C)C
NDL	ST042161	0.442941	0.889625	CC(CC(C(=O)O)NS(=O)(=O)c1c(cc(cc1C(C)C)C(C)C)C(C)C)C
NDL	ST092788	1.19533	1.39158	O=C1C=C2C3CC(C)(CCC3(C)CCC2(C2(C1C1(C)CCC(=O)C(C1CC2)(C)C)C)C)C(=O)O
NDL	ST042165	0.961062	1.12201	OC(=O)C1Nc2c(I)cccc2C2C1CC=C2
NDL	ST042372	1.26237	1.28314	CCOC(=O)CNC(=O)c1cccc(c1)C
NDL	ST042674	1.00672	1.13801	COC(=O)CNC(=O)c1ccc(cc1)Cl
NDL	ST042763	0.767118	1.27036	COC(=O)CNC(=O)c1cccc(c1)Cl
NDL	ST042848	1.13961	1.43389	CCOC(=O)c1ccccc1NC(=O)C(C)C
NDL	ST042942	1.17639	1.26665	COC(=O)CNC(=O)c1ccc(c(c1)Cl)Cl
NDL	ST042960	1.21494	1.36462	COc1ccc(cc1OC)C(=O)Nc1c(C)cccc1CC
NDL	ST042961	0.92843	1.31737	COc1cc(ccc1OC)C(=O)Nc1ccccc1C(C)C
NDL	ST042962	0.883366	1.28026	COc1cc(ccc1OC)C(=O)N1CCN(CC1)c1cccc(c1)Cl
NDL	ST042968	0.844814	1.3158	CCN(c1ccccc1C)C(=O)c1ccc(c(c1)OC)OC
NDL	ST042970	1.51766	1.40701	COc1cc(ccc1OC)C(=O)NCc1ccccc1
NDL	ST042976	1.19415	1.19722	COc1cc(ccc1OC)C(=O)NCc1ccc(cc1)C
NDL	ST042983	1.15797	1.2683	COc1cc(OC)cc(c1)C(=O)Nc1cccc(c1)Cl
NDL	ST043059	0.981781	1.39332	COc1cccc(c1)C(=O)Nc1ccccc1C(=O)OC
NDL	ST043061	1.45824	0.948257	CCOC(=O)CNC(=O)c1cccc(c1)OC
NDL	ST043078	0.909413	1.35975	COC(=O)CNC(=O)c1cccc(c1)OC
NDL	ST043135	1.06902	1.21379	CC(=O)N1CCc2c(C1)cccc2
NDL	ST043173	0.749951	1.04763	CCOc1cc(ccc1OCC)C(=O)Nc1ccccc1OC
NDL	ST043180	0.898757	1.32174	COc1ccc(c(c1)OC)NC(=O)Cc1ccc(c(c1)OC)OC
NDL	ST043224	0.600553	1.03542	COc1cccc(c1)NC(=O)c1ccc2c(c1)OCO2
NDL	ST043226	1.23455	1.6887	CCOc1ccccc1NC(=O)c1ccc2c(c1)OCO2
NDL	ST043227	1.31935	1.02965	CCOc1ccc(cc1)NC(=O)c1ccc2c(c1)OCO2
NDL	ST043243	1.01856	1.46844	COc1ccccc1NC(=O)c1ccc2c(c1)OCO2
NDL	ST043247	0.99066	0.95675	O=C(c1ccc2c(c1)OCO2)Nc1nccs1
NDL	ST043268	1.00198	1.3426	COc1ccc(c(c1)NC(=O)c1cc(OC)c(c(c1)OC)OC)OC
NDL	ST043269	0.672847	0.897459	COc1cc(cc(c1OC)OC)C(=O)NCc1ccccc1OC
NDL	ST043353	0.991252	1.37212	CCOC(=O)C(=O)Nc1ccccc1C(=O)OCC
NDL	ST043392	0.891653	0.901334	CCOC(=O)c1ccccc1NC(=O)C(=O)Nc1ccccc1C(=O)OCC
NDL	ST043420	1.20244	1.13256	COc1cc(cc(c1OC)OC)C(=O)Nc1ccccc1C#N
NDL	ST043440	1.37574	1.41121	CCOc1cc(ccc1OCC)C(=O)Nc1ccc(c(c1)Cl)C#N
NDL	ST043487	1.19297	1.07286	O=C(Cn1cnc2c1c(=O)n(C)c(=O)n2C)NCc1ccc(cc1)S(=O)(=O)N
NDL	ST044056	1.07909	1.31333	CCOC(=O)c1cccc(c1)NC(=O)c1cc(OC)cc(c1)OC
NDL	ST044494	1.20843	1.20225	Cc1[nH]c(=O)[nH]c(=O)c1Br
NDL	ST044551	1.27725	1.37138	COc1cc(ccc1Oc1cc(cc(c1)C(F)(F)F)[N+](=O)[O-])C(=O)Nc1cc(ccc1N1CCCCC1)C(F)(F)F
NDL	ST044552	1.14435	1.3539	COc1cc(ccc1Oc1cc(cc(c1)C(F)(F)F)[N+](=O)[O-])C(=O)Nc1cc(ccc1N1CCOCC1)C(F)(F)F
NDL	ST044561	1.16685	1.39909	CSCCC(C(=O)O)NC(=O)c1cc(oc1C)c1ccccc1
NDL	ST044630	1.2381	1.40362	CSC(=N)c1cc(OC)c(c(c1)OC)OC.I
NDL	ST044974	1.0708	1.24909	COc1ccc(cc1)NC(=O)c1cc2ccccc2oc1=N
NDL	ST045060	1.06902	1.40552	COc1cc(cc(c1OC)OC)/C(=N/N=C\1/SC(C(=O)N1)CC(=O)O)/C
NDL	ST045065	0.856653	1.34532	COc1ccc2c(c1)c(CC(=O)NCc1ccccn1)c(n2C(=O)c1ccc(cc1)Cl)C
NDL	ST045273	1.50456	1.37064	CCC(=O)NC(C(F)(F)F)(C(F)(F)F)N1CCCCC1c1cccnc1
NDL	ST045276	1.19415	1.31613	Cn1c(=O)n(C)c2c(c1=O)n(CCC/N=C/1\CCCCN1)c(n2)N1CCOCC1
NDL	ST045374	0.723238	1.29683	COC(=O)c1ccc(cc1)C(=O)NCCc1c(C)[nH]c2c1c(F)ccc2C
NDL	ST045414	1.11645	1.3172	Clc1ccc2c(c1)c(=O)c(c(o2)c1cccnc1)O
NDL	ST045488	0.908229	1.28166	O=C(c1cc(F)c(cc1Cl)F)NCCc1c(C)[nH]c2c1cccc2
NDL	ST045538	0.959286	1.23136	CC(=O)NCC(=O)N(C1(CCCCC1)C(=O)Nc1c(C)cccc1C)CCc1c[nH]c2c1cccc2
NDL	ST045600	1.08856	1.13982	O=C(c1ccccc1[N+](=O)[O-])NCCc1c(C)[nH]c2c1cccc2
NDL	ST045687	1.41259	1.22426	O=C(c1cc2cc(Br)ccc2oc1=O)NC1CC(C)(C)NC(C1)(C)C
NDL	ST046338	1.49687	1.1117	COCCOC(=O)C1=C(N)OC2=C(C1c1cccnc1)C(=O)CC(C2)(C)C
NDL	ST046798	1.28021	1.14724	N#Cc1c(SCC(=O)c2ccc(c(c2)OC)OC)nc(cc1c1ccc(cc1)F)c1ccccc1
NDL	ST046829	0.799158	0.53121	O=C(c1ccc(cc1)Cl)/C=C/C(=O)O
NDL	ST047749	1.2808	1.01052	[O-][N+](=O)c1ccc(cc1)c1csc(n1)N1CCc2c(C1)cccc2
NDL	ST047874	0.934941	1.41278	CC(=O)NC(C(=O)NCCOc1ccccc1c1ccccc1)Cc1c[nH]c2c1cccc2
NDL	ST048135	1.33067	1.11797	COc1cc(OC)cc(c1)C(=O)c1ccc(cc1)C(=O)NC1(CC1)c1ccccc1
NDL	ST048140	1.10217	1.20794	NC(=O)NCCc1c(C)[nH]c2c1cccc2
NDL	ST048234	0.556155	0.937866	O=C(CCC(=O)c1ccccc1)NCCc1c(C)[nH]c2c1cccc2
NDL	ST048250	1.01915	1.28751	CCOc1cc(cc(c1O)Br)C1Nc2ccccc2NC2=C1C(=O)CC(C2)c1cccs1
NDL	ST048369	0.788503	0.930362	O=C1C2C3C=CC(C2C(=O)N1c1cn(C(=O)C)c(=O)[nH]c1=O)C3
NDL	ST048386	0.974085	1.34483	COc1cc(CNC(=O)c2n[nH]c(=O)c3c2cccc3)ccc1OC
NDL	ST048658	0.930205	1.20637	CCOC(=O)/C=C/1\NC(C)(C)Cc2c1cc1OCCOc1c2
NDL	ST048901	1.65899	1.25453	O=c1cc(C)c2c(o1)c(C)c(cc2)O
NDL	ST049008	1.31758	1.25057	Brc1cncc(c1)C(=O)N/N=C(\C=C/c1ccc2c(c1)OCO2)/C
NDL	ST049022	0.958102	1.17363	O=C(CNc1ccc(cc1)C)N/N=C\c1c(C)cc(cc1O)O
NDL	ST049045	1.54023	1.31382	OCCN1C(=O)/C(=N\Nc2cccc(c2C)Cl)/C(=C(C1=O)C#N)C
NDL	ST049081	1.20429	1.13223	O=C(c1ccncc1)N/N=C/C=C/c1ccc2c(c1)OCO2
NDL	ST049112	1.3289	1.24777	COc1cc(ccc1OC)C(=O)NC(=S)Nc1cc(ccc1Cl)C(F)(F)F
NDL	ST049114	1.51944	1.23185	Clc1ccccc1CSc1nc2c([nH]1)ncnc2N
NDL	ST049115	1.19889	1.24463	O=C(Nc1ccc(cc1)C)CSc1nc2c([nH]1)ncnc2N
NDL	ST049116	1.07198	1.31283	COc1ccc(cc1)NC(=O)CSc1nc2c([nH]1)ncnc2N
NDL	ST049173	1.01382	1.29287	OC(C(C(=O)O)N)c1ccccc1
NDL	ST049221	1.11172	1.24406	Ic1c[nH]c(=O)[nH]c1=O
NDL	ST049249	1.301	1.1357	O=C1NC(=O)/C(=C\c2cn(c3c2cccc3)Cc2ccccc2)/C(=O)N1Cc1ccccc1
NDL	ST049489	0.496292	1.27358	COc1cc(OC)c(cc1/N=C\1/c2ccccc2N(C1=O)CN1CCc2c(C1)cccc2)Cl
NDL	ST049552	1.02684	1.38631	COc1ccc2c(c1)c(CC(=O)Nc1c(C)n(n(c1=O)c1ccccc1)C)c(n2C(=O)c1ccc(cc1)Cl)C
NDL	ST049566	0.567994	1.3205	O=C(c1ccccc1Br)NCCc1c(C)[nH]c2c1cccc2
NDL	ST049567	1.07613	1.29024	O=C(c1ccc(cc1)C(F)(F)F)NCCc1c(C)[nH]c2c1cccc2
NDL	ST049753	1.57878	1.24991	NC(C(=O)O)CCCC(C(=O)O)N
NDL	ST049800	1.0227	1.32949	C=CCNC(=O)Cc1c(C)n(c2c1cc(OC)cc2)C(=O)c1ccc(cc1)Cl
NDL	ST049813	1.15323	1.1719	COc1ccc2c(c1)c(CC(=O)NCCSc1ccccc1)c(n2C(=O)c1ccc(cc1)Cl)C
NDL	ST049846	1.16685	1.09686	Clc1ccc(c(c1)C)OCCn1c(C)c(c2c1ccc(c2)O)C(=O)C
NDL	ST049936	1.01145	1.19722	OC(=O)C(Cc1c[nH]c2c1cccc2)NC(=O)c1ccc(cc1)C12CC3CC(C2)CC(C1)C3
NDL	ST050032	0.402095	1.012	COc1cc(ccc1OC)C(=O)NCCc1c(C)[nH]c2c1cc(cc2)OC(F)(F)F
NDL	ST050052	1.26178	1.06445	COc1cc(OC)cc(c1)C(=O)c1ccc(cc1)C(=O)Nc1ccc2c(c1)cccn2
NDL	ST050054	0.89047	1.09579	COc1ccccc1C(=O)NCCc1c(C)[nH]c2c1cc(OCc1ccccc1)cc2
NDL	ST050055	0.741663	1.26467	COc1cc(ccc1OC)C(=O)NCCc1c(C)[nH]c2c1cc(OCc1ccccc1)cc2
NDL	ST050098	0.774814	1.05942	COC(=O)c1ccc(cc1)C(=O)NCCc1c(C)[nH]c2c1cc(OCc1ccccc1)cc2
NDL	ST050100	1.03698	1.12737	CCOC(=O)c1c(C)n(c2c1cc(O)c1c2cccc1)CCOCc1ccccc1Cl
NDL	ST050106	0.645024	1.06321	CCOC(=O)c1c2cc(O)ccc2n(c1C)CCCNc1ccc(cc1Cl)[N+](=O)[O-]
NDL	ST050115	1.27488	1.26698	O=C(C1CCCN1c1scc(n1)c1ccc(cc1)Br)OCc1ccccc1
NDL	ST050140	0.787911	1.06371	CCOc1cc2c(cc1OCC)CCNC2c1cccc(c1F)F
NDL	ST050151	1.08441	1.08457	Brc1cccc(c1)C(=O)NCCc1c(C)[nH]c2c1cc(OCc1ccccc1)cc2
NDL	ST050180	0.656864	1.09282	O=C(c1cccc(c1F)F)NCCc1c(C)[nH]c2c1cc(cc2)OC(F)(F)F
NDL	ST050633	0.939085	1.24595	N#CC1=C(N)Oc2c(C1c1cc(OC)c(c(c1)OC)O)c(CC)n[nH]2
NDL	ST050731	1.25468	1.39678	CCCc1n[nH]c2c1C(c1ccc(cc1)O)C(=C(O2)N)C#N
NDL	ST050780	1.03461	1.08276	N#CC1=C(N)Oc2c(C1c1ccc(cc1)O)c(C)n[nH]2
NDL	ST051184	1.37396	1.43232	COc1ccc2c(c1)c(CC(=O)NCc1cc(OC)c(c(c1)OC)OC)c(n2C(=O)c1ccc(cc1)Cl)C
NDL	ST051247	0.947373	1.11978	COc1ccc2c(c1)c(CC(=O)NC(c1ccccc1)C)c(n2C(=O)c1ccc(cc1)Cl)C
NDL	ST051349	1.37278	1.2335	CCOC(=O)c1c(C)n(c2c1cc(O)cc2)CCOc1cccc(c1Cl)Cl
NDL	ST051365	1.17698	1.24331	COc1ccc2c(c1)c(CC(=O)NC(c1ccc(cc1)Br)c1ccccc1)c(n2C(=O)c1ccc(cc1)Cl)C
NDL	ST051369	1.1758	1.32858	OC(=O)CSc1[nH]c2c(n1)c(=O)[nH]cn2
NDL	ST051546	0.980005	1.35382	COc1ccc2c(c1)c(CC(=O)N1CCN(CC1)c1ccccc1)c(n2C(=O)c1ccc(cc1)Cl)C
NDL	ST051579	1.29449	1.19713	COc1ccc2c(c1)c(CC(=O)NCCOc1ccc(cc1)Cl)c(n2C(=O)c1ccc(cc1)Cl)C
NDL	ST051582	1.06066	1.25148	COc1ccc2c(c1)c(CC(=O)NC13CC4CC(C3)CC(C1)C4)c(n2C(=O)c1ccc(cc1)Cl)C
NDL	ST051585	1.1758	1.2509	COc1ccc2c(c1)c(CC(=O)NCCOc1c(C)cccc1C)c(n2C(=O)c1ccc(cc1)Cl)C
NDL	ST051671	1.21613	1.25436	COc1cc(OC)cc(c1)C(=O)NCCOc1ccccc1
NDL	ST051889	1.06658	1.3205	COc1ccc2c(c1)c(CC(=O)N1CCN(CC1)C(=O)c1ccccc1)c(n2C(=O)c1ccc(cc1)Cl)C
NDL	ST052109	0.949148	1.26434	Cc1ccc(cc1)OCCn1cc(Br)c(=O)[nH]c1=O
NDL	ST052110	0.898165	1.25057	Clc1ccc(cc1)OCCn1cc(Br)c(=O)[nH]c1=O
NDL	ST052113	1.01619	1.20884	Cc1ccc(cc1)OCCOCn1cc(Br)c(=O)[nH]c1=O
NDL	ST052116	0.491659	0.957764	Clc1ccc(cc1)OCCOCn1c(C)cc(=O)[nH]c1=O
NDL	ST052119	0.957617	1.19299	Brc1cn(C(c2ccccc2)c2ccccc2)c(=O)[nH]c1=O
NDL	ST052159	0.810624	1.06114	COc1cccc(c1OC)C1Nc2ccccc2NC2=C1C(=O)CC(C2)c1ccc(cc1)Cl
NDL	ST052168	0.956599	1.16499	COc1ccc(c(c1)C1Nc2ccccc2NC2=C1C(=O)CC(C2)c1ccc(cc1)Cl)OC
NDL	ST052217	0.931747	1.0953	COC(=O)C1=CNC=C(C1c1cc(OC)c(c(c1)OC)OC)C(=O)OC
NDL	ST052224	1.13604	1.07803	COc1ccc(cc1C1C(=C(C)NC2=C1C(=O)CCC2)C(=O)OCC1CCCO1)Br
NDL	ST052275	0.837173	1.04103	CCOc1cc(cc(c1OC)Br)C1Nc2ccccc2NC2=C1C(=O)CC(C2)c1ccc(c(c1)OC)OC
NDL	ST052326	0.920848	0.908285	COc1cc(c(c(c1OC)OC)Br)C1NC(=O)CCC1[N+](=O)[O-]
NDL	ST052329	0.490302	0.587653	COc1c(OC)cc(cc1OC)C1Nc2ccccc2NC2=C1C(=O)CC(C2)c1ccccc1Cl
NDL	ST052428	1.34215	1.25617	CCN1C=C(C(=O)OC)C(C(=C1)C(=O)OC)c1cc(OC)c(c(c1)OC)OC
NDL	ST052456	0.58513	1.09963	COc1ccc(cc1O)C1Nc2ccccc2NC2=C1C(=O)CC(C2)c1ccccc1Cl
NDL	ST052463	1.00427	0.911779	COc1ccc(c(c1)C1Nc2ccccc2NC2=C1C(=O)CC(C2)c1ccccc1Cl)OC
NDL	ST052468	0.818767	0.987723	Clc1ccc2c(c1)c(=O)c(co2)C1C(=C(C)NC2=C1C(=O)CCC2)C(=O)OCc1ccccc1
NDL	ST052473	0.937897	0.852112	COC(=O)C1=CN(C=C(C1c1cc(OC)c(c(c1)OC)OC)C(=O)OC)C(c1ccccc1)C
NDL	ST052479	0.478427	0.601232	Oc1ccc(cc1)C1Nc2ccccc2NC2=C1C(=O)CC(C2)c1ccccc1Cl
NDL	ST052484	1.10266	1.25537	Cc1ccc2c(c1)c(=O)c(co2)C1Nc2ccccc2NC2=C1C(=O)CC(C2)c1ccccc1Cl
NDL	ST052490	0.556249	0.857086	CC(Oc1ccccc1C1Nc2ccccc2NC2=C1C(=O)CC(C2)c1ccccc1Cl)C
NDL	ST052503	0.874578	0.789179	COC(=O)C1=C(C)NC2=C(C1c1coc3c(c1=O)cc(cc3)Cl)C(=O)CCC2
NDL	ST052550	1.01992	1.03623	O=C(/C=C/c1ccc2c(c1)OCO2)NCCSCc1cccc(c1)Cl
NDL	ST052552	1.16704	1.088	O=C(/C=C/c1ccc2c(c1)OCO2)NCc1ccc(cc1)Cl
NDL	ST052560	0.725932	1.03697	COC(=O)c1ccc(cc1)/C=N/NC(=O)c1ccc(cc1)CN1CCc2c(C1)cccc2
NDL	ST052561	0.475713	0.716103	COc1cccc(c1)NC(=O)c1ccc(cc1)CN1CCc2c(C1)cccc2
NDL	ST052562	0.82322	1.16955	Clc1ccc(cc1)CSCCNC(=O)c1ccc(cc1)CN1CCc2c(C1)cccc2
NDL	ST052637	1.14079	0.92109	N#C/C(=C\c1ccc(o1)N1CCOCC1)/C(=O)NCCc1c[nH]c2c1cccc2
NDL	ST052638	0.464813	0.903401	N#C/C(=C\c1ccc(o1)c1cc(ccc1Cl)C(=O)O)/C(=O)NCCc1c[nH]c2c1cccc2
NDL	ST052704	1.45229	1.12337	O=C1N(C)C(=O)C(=Cc2ccc3c(c2)OCO3)C(=O)N1C
NDL	ST052802	1.10164	1.13556	COc1cc(OC)cc(c1)C(=O)Nc1ccc(cc1)NC(=O)C
NDL	ST052818	1.11593	0.942181	COc1cc(CCNC(=O)COc2ccc(cc2)C)ccc1OC
NDL	ST052856	0.964445	1.10711	CCCCc1ccc(cc1)NC(=O)c1cc(OC)c(c(c1)OC)OC
NDL	ST052954	1.23892	0.945778	COc1cc(/C=C\2/S/C(=N\c3cccc(c3Cl)Cl)/NC2=O)cc2c1OCO2
NDL	ST053197	0.13673	0.619034	COc1cc(ccc1OCc1ccc(cc1)Cl)C(=O)NCc1cccnc1
NDL	ST053431	1.41921	1.06705	Cc1ccc(cc1)OCCSc1nc2c([nH]1)ncnc2N
NDL	ST053448	0.419986	1.05413	Cc1ccc(cc1C)OCCSc1ncnc2c1nc[nH]2
NDL	ST053494	1.01992	1.05395	OC(=O)C1NC(C)c2c(C1)c1ccccc1[nH]2
NDL	ST053662	0.874239	1.01658	COc1ccc(cc1)C(=O)NC(C(=O)O)Cc1c[nH]c2c1cccc2
NDL	ST053741	0.841584	1.07259	Cc1nc2c(C)cccc2c(c1CN1CCCC1)O
NDL	ST054184	0.761641	1.04509	O=c1cc(C)c2c(o1)cc(cc2)OCc1ccccc1F
NDL	ST054368	0.827631	0.794972	CCOC(=O)/C=C/C(=O)Nc1ccccc1c1ccccc1NC(=O)/C=C/C(=O)OCC
NDL	ST054396	0.519183	0.808222	CCOC(=O)CCC(=O)Nc1ccc(cc1)C(=O)OCC
NDL	ST054410	0.976362	1.11063	CCOC(=O)CCC(=O)Nc1ccccc1C(=O)Nc1ccccc1
NDL	ST054415	0.370027	0.560505	O=C(Nc1ccc(cc1)C)CCC(=O)O
NDL	ST054547	1.37659	1.24421	COc1cc(cc(c1OC)OC)C(=O)Oc1ccc(c2c1cccc2)Br
NDL	ST054635	0.563035	0.778058	O=C(NC(C(=O)O)Cc1ccccc1)OCc1ccccc1
NDL	ST054863	1.0904	1.03042	COc1cc(cc(c1OC)OC)C(=O)Oc1ccc(cc1Br)C(C)(C)C
NDL	ST054930	0.420325	0.604624	CC(=O)N/C(=C\c1ccccc1)/C(=O)Nc1cc(C)ccc1C
NDL	ST054946	1.26619	1.28838	CC(=O)Nc1ccc(cc1)NC(=O)/C=C/c1ccccc1
NDL	ST055064	0.530422	0.628766	CCCCC(C(=O)O)NC(=O)c1ccc(cc1)Cl
NDL	ST055065	1.17929	1.31638	O=C(c1ccc(cc1)Cl)NCC(=O)O
NDL	ST055066	0.940272	1.13242	COc1ccc(cc1)C(=O)NCC(=O)O
NDL	ST055114	1.22357	0.995372	CCOC(=O)c1ccc(cc1)NC(=O)CCC(=O)O
NDL	ST055252	1.10503	1.08662	CCN1CCN(C(=O)C1=O)C(=O)NC(c1ccc(cc1)O)C(=O)NC1C(=O)N2C1SCC(=C2C(=O)[O-])CSc1nnnn1C.[Na+]
NDL	ST055268	1.14388	0.938494	COc1cc(cc(c1OC)OC)C(=O)Nc1ccc(c(c1)Cl)Br
NDL	ST055353	0.721478	1.12521	O=C1c2ccccc2C(=O)c2c1ccc(c2N)C
NDL	ST055419	0.957956	1.00025	Clc1ccc(c(c1)S(=O)(=O)N(CC(=O)N1CCc2c(C1)cccc2)C)Cl
NDL	ST055620	0.914401	1.18605	NC(=N)NCCCC(C(=O)O)NC(=O)C
NDL	ST055621	1.41717	1.05754	NC(=N)NCCCC(C(=O)Nc1ccc2c(c1)cccc2)NC(=O)c1ccccc1.Cl
NDL	ST055622	0.284783	1.09022	COc1ccc(cc1)C(c1ccc(cc1)OC)(c1ccccc1)OCC1OC(CC1O)n1cnc2c1ncnc2N
NDL	ST055628	1.60369	1.20244	OC(=O)CC[C@H](C(=O)O)NC(=O)c1ccc(cc1)NCc1c[nH]c2c(n1)c(=O)nc(n2)N.O
NDL	ST055632	0.989637	1.17387	NC(=N)NCCCC(C(=O)O)NC(=O)N
NDL	ST055648	1.35033	1.11838	COc1ccc(cc1/C=C/C(=O)O)Br
NDL	ST055809	0.784754	1.03125	CCCCCC[n+]1ccccc1/C=C/c1ccc2c(c1)OCO2.[I-]
NDL	ST055810	1.57366	1.10794	O=C(c1ccc(cc1)OC(=O)c1ccc(cc1)[N+](=O)[O-])/C=C/c1ccccc1Cl
NDL	ST055811	0.917794	0.948817	Clc1cccc(c1)/C=C/C(=O)c1ccc(cc1)OC(=O)c1cccc(c1)[N+](=O)[O-]
NDL	ST055817	1.38477	1.08486	CCOc1ccc(cc1)c1oc2ccccc2c(=O)c1OS(=O)(=O)c1ccc(cc1)Br
NDL	ST055840	1.00393	1.17137	Brc1ccc(cc1)NCCC(=O)c1ccc2c(c1)OCO2
NDL	ST055853	0.936879	0.953427	COc1cc(ccc1OC)C(=O)CCS(=O)(=O)c1ccc(cc1)Cl
NDL	ST055881	0.838869	1.09871	O=C(OCc1ccccc1)NCCCCC(C(=O)O)NC(=O)OC(C)(C)C
NDL	ST055882	0.904181	1.13012	OC(=O)C(NC(=O)C1CCCN1C(=O)OCc1ccccc1)Cc1ccccc1
NDL	ST055886	0.704133	0.855425	COc1ccc2c(c1)c(CC(=O)Nc1ccc3c(c1)OCCO3)c(n2C(=O)c1ccc(cc1)Cl)C
NDL	ST055903	1.07713	0.928636	COc1ccc2c(c1)c(CC(=O)Nc1nnc(s1)CC)c(n2C(=O)c1ccc(cc1)Cl)C
NDL	ST055909	0.380545	0.894648	COCCNC(=O)Cc1c2cc(OC)ccc2n(c1C)C(=O)c1ccc(cc1)Cl
NDL	ST055915	1.08972	0.944765	COc1ccc2c(c1)c(CC(=O)NCCCN1CCCCC1)c(n2C(=O)c1ccc(cc1)Cl)C
NDL	ST055924	0.794636	0.826991	CSc1ccc(c(c1)C(=O)NCC1(C)CCCC2(C1CCc1c2cc(cc1)C(C)C)C)Cl
NDL	ST056109	1.34932	1.08209	O=C1NC(=O)C(=Cc2ccc(c(c2)O)O)C(=O)N1
NDL	ST056192	0.528047	0.621606	CC(C(=O)O)NC(=O)Nc1ccccc1
NDL	ST056202	1.04002	1.27597	CCOC(=O)C1C(c2cc(OC)c(c(c2)OC)OC)c2cc3OCOc3cc2OC1(C)OC
NDL	ST056228	0.384616	0.553722	COc1ccc(cc1)c1cc(=O)c2c(o1)ccc(c2)O
NDL	ST056230	1.05838	1.19595	Clc1ccc(cc1)c1cc2ccccc2oc1=O
NDL	ST056231	0.409087	0.616462	Clc1ccc(cc1)c1c(=O)oc2c(c1C)ccc(c2)O
NDL	ST056232	1.20656	1.20574	Clc1ccc(cc1)c1cc2ccc(cc2oc1=O)O
NDL	ST056236	0.995744	1.17387	Clc1ccc(c(c1)Cl)c1cc2ccc(cc2oc1=O)O
NDL	ST056237	1.31831	0.972595	Clc1ccccc1c1cc2ccccc2oc1=O
NDL	ST056238	0.799725	1.08681	Oc1ccc2c(c1)oc(=O)c(c2)c1ccccc1Cl
NDL	ST056239	1.3558	1.02986	Oc1ccc2c(c1)oc(=O)c(c2C)c1ccccc1Cl
NDL	ST056240	1.01241	1.0977	COc1ccc2c(c1)oc(=O)c(c2)c1ccccc1Cl
NDL	ST056241	1.21369	1.02572	Clc1cccc(c1)c1cc2ccccc2oc1=O
NDL	ST056242	0.924622	1.19356	Oc1ccc2c(c1)oc(=O)c(c2)c1cccc(c1)Cl
NDL	ST056243	1.26823	1.14906	Clc1cccc(c1)c1c(=O)oc2c(c1C)cc(cc2)O
NDL	ST056244	0.904859	1.08477	Oc1ccc2c(c1)oc(=O)c(c2C)c1cccc(c1)Cl
NDL	ST056245	1.28562	1.01815	COc1ccc2c(c1)oc(=O)c(c2)c1cccc(c1)Cl
NDL	ST056362	0.858251	1.10915	OC(=O)/C=C/c1ccc(c(c1)Br)F
NDL	ST056387	1.40967	1.18104	OC(=O)CC(=C(C)C)C(=O)O
NDL	ST056516	0.82797	0.998411	COc1cc(cc(c1OC)OC)C(=O)NNC(=O)C1CC=CCC1C(=O)O
NDL	ST056547	1.47239	1.03439	O=C(N1CCc2c(C1)cccc2)CN1c2ccccc2C(=O)C1=O
NDL	ST056689	0.81266	1.01133	C=CCn1c(SCc2cc(=O)[nH]c3c2cccc3)nnc1c1cccc(c1)Br
NDL	ST056692	1.4891	1.06383	O=c1cc(CSc2nnc(n2C)COc2ccccc2)c2c([nH]1)cccc2
NDL	ST056740	0.537886	0.776487	COCc1nnc(n1c1ccccc1)SCC(=O)c1ccc2c(c1)OCO2
NDL	ST056759	0.765034	1.24421	COC(=O)c1cc(OC)c(c(c1NS(=O)(=O)c1ccc2c(c1)c1ccccc1o2)OC)OC
NDL	ST056764	0.572577	0.845579	COc1cc(C(=O)Nc2ccc(cc2)c2ccc(cc2)[N+](=O)[O-])c(c(c1OC)OC)Br
NDL	ST056913	0.93039	1.02941	OCC1OC(OC2OC(CO)C(C(C2O)O)O)C(C(C1O)O)O.O
NDL	ST056918	0.883781	1.05091	OCC1OC(CC1O)n1cc(c(=O)[nH]c1=O)C(F)(F)F
NDL	ST057032	1.09074	0.912337	CCOC(=O)c1sc(nc1C)N1N=C(/C(=C\c2cc3OCOc3cc2OC)/C1=O)C
NDL	ST057039	0.850066	1.05617	Nc1ncnc2c1nc([nH]2)SCCOc1ccc(cc1)C(C)(C)C
NDL	ST057042	1.0097	0.932324	O=C1NC(=O)N(C(=O)/C/1=C/c1ccc(cc1)N1CCCCC1)c1ccc2c(c1)OCO2
NDL	ST057231	0.46176	0.563806	CCOC(=O)CNC(=O)c1ccc(cc1)OC
NDL	ST057245	1.08905	1.22464	COc1ccc(cc1)C(c1ccc(cc1)OC)NC(=O)CC(C(=O)O)NOC(=O)CC1c2ccccc2c2c1cccc2
NDL	ST057254	0.884121	0.997125	OC(=O)CCC(C(=O)O)NC(=O)c1ccc(cc1)N(Cc1cnc2c(n1)c(N)nc(n2)N)C
NDL	ST057334	1.10503	0.935637	CC(=O)N[C@H](C(=O)N)Cc1c[nH]c2c1cccc2
NDL	ST057344	0.422022	0.641332	OCC1OC(C(C(C1O)O)O)N(c1cc(Cl)c2c(c1Oc1cccc(c1)C(F)(F)F)c(C)cc(n2)C)C(=O)C
NDL	ST057345	1.06042	1.19937	COc1cc(N(C2OC(COC(=O)C)C(C(C2OC(=O)C)OC(=O)C)OC(=O)C)C(=O)C)c(c2c1nc(C)cc2C)OC
NDL	ST057361	0.37783	0.500179	CC[N+](=c1ccc2c(c1)oc1c(n2)c(cc(c1O)O)C(=O)N)CC.[Cl-]
NDL	ST057448	1.10436	1.24228	CCOC(=O)c1cc2cc(Br)ccc2oc1=O
NDL	ST057513	0.550142	0.932882	Brc1ccc(cc1)c1cc2ccc(cc2oc1=O)O
NDL	ST057514	1.00766	0.967166	Oc1ccc2c(c1)oc(=O)c(c2)c1cccc(c1)Br
NDL	ST057538	0.513076	1.01133	BrCC(=O)c1cc2ccccc2oc1=O
NDL	ST057564	1.30194	1.11939	O=C(Cc1c[nH]c2c1cccc2)NC(C(=O)O)CC(=O)O
NDL	ST057567	1.02539	1.15623	NC(=O)NC(C(=O)O)Cc1c[nH]c2c1cccc2
NDL	ST057591	1.06657	0.923571	OC(=O)Cc1c[nH]cn1
NDL	ST057628	1.25902	1.1955	COc1cc(O)c(c(c1)OC)C(=O)Cc1ccc(cc1)Cl
NDL	ST057631	1.45398	1.03936	COc1cc(O)c(c(c1)OC)C(=O)Cc1ccccc1Cl
NDL	ST057632	0.110266	0.632795	Clc1cccc(c1)CC(=O)c1c(O)cc(cc1O)O
NDL	ST057725	0.611297	0.669253	O=C1c2c(ccc(c2C(=O)c2c1c(ccc2O)[N+](=O)[O-])O)[N+](=O)[O-]
NDL	ST057731	1.072	1.12309	Nc1ccc2c(c1)oc1c(c2c2ccccc2C(=O)O)ccc(=[NH2+])c1.[Cl-]
NDL	ST057804	1.66205	1.03199	O=C(CN1C(=O)N/C(=C\c2cc3OCOc3cc2Cl)/C1=O)Nc1cccc(c1)C
NDL	ST057890	0.810964	1.08422	O=C(CN1C(=O)S/C(=C/c2cc3OCOc3cc2Cl)/C1=O)Nc1ccc(c(c1)C)C
NDL	ST058035	1.51535	1.1363	O=C(CN1C(=O)N/C(=C/c2cc3OCOc3cc2Cl)/C1=O)Nc1ccc(cc1)C
NDL	ST058036	0.981791	1.23522	COc1cc(/C=C\2/NC(=O)N(C2=O)CC(=O)Nc2ccc(cc2)C)cc2c1OCO2
NDL	ST058064	1.34287	1.07342	O=C(Nc1ccccc1F)CN1C(=O)S/C(=C\c2cc3OCOc3cc2[N+](=O)[O-])/C1=O
NDL	ST058074	0.916437	1.09936	O=C(CN1C(=O)S/C(=C/c2cc3OCOc3cc2Cl)/C1=O)Nc1ccc(cc1)C
NDL	ST058101	1.06419	1.29669	CCOc1cc2OCOc2cc1/C=C\1/NC(=O)N(C1=O)CC(=O)Nc1ccc(cc1)Cl
NDL	ST058126	0.730003	1.14314	CN1C2CCC1CC(=O)C2
NDL	ST058289	0.950153	1.10711	CCOC(=O)c1sc(nc1C)N1N=C(/C(=C\c2ccc3c(c2)OCO3)/C1=O)C
NDL	ST058403	0.83272	1.06844	O=C(OC(C)(C)C)N[C@H](C(=O)O)Cc1ccc(cc1)OC(C)(C)C
NDL	ST058410	1.04409	0.977023	Brc1ccc(cc1)c1c(=O)oc2c(c1c1ccccc1)cc(cc2Br)Cl
NDL	ST058411	0.327575	0.81356	Oc1ccc(cc1)c1c(=O)oc2c(c1C)cc(cc2Br)Cl
NDL	ST058418	1.33401	1.35189	COc1cc(C=O)cc(c1O)I
NDL	ST058420	0.581059	1.18525	OC[C@@H](C(C1OC(=O)[C@H]([C@H]1O)O)O)O
NDL	ST058433	1.13196	1.13316	Clc1ccc(cc1)c1cc(=O)c2c(o1)ccc(c2)C
NDL	ST058439	0.554214	0.703332	Brc1ccc(cc1)c1c(=O)oc2c(c1C)cccc2
NDL	ST058444	1.05567	1.22384	COc1cc(ccc1OC)c1c(=O)oc2c(c1C)cc(c(c2)O)Cl
[truncated: 2,288 more rows]

## Sheet: 2. Agonist hit validation
NAME/ID	(+) Sm.5HTRL fold change	(-)Sm.5HTRL fold change
6435	200.129	0.990099	PASS
ST055634	165.214	1.31	PASS
ST056346	94.3413	1.42	PASS
72715	54.6116	0.944499	PASS
ST072185	29.8904	1	PASS
ST070930	17.0489	1.13	PASS
ST057158	15.5169	1.1	PASS
ST093597	15.2823	1.1795	PASS
ST070282	12.6864	1.36633	PASS
ST057097	11.9433	1.03	PASS
ST095769	11.737	2.53471	PASS
ST005872	10.4008	0.730537	PASS
62786	230.23	88.8519	FAIL
ST095786	95.4625	121.77	FAIL
ST069368	60.6229	94.0773	FAIL
7652	49.711	7.80199	FAIL
ST056944	28.3016	56.2672	FAIL
ST009496	24.237	3.9	FAIL
ST088476	23.2211	3.82	FAIL
ST077771	12.8429	15.0437	FAIL

## Sheet: 3. Antagonist hit validation
NAME	(+) Sm.5HTR 5-HT response (% of DMSO)	(-) Sm.5HTR Forskolin response (% of DMSO)
ST057602	0.029139	1.3	PASS
ST055762	0.295165	1.27	PASS
339555	0.260222	1.21569	PASS
ST077136	0.0410928	1.2	PASS
ST057530	0.05939	1.2	PASS
283445	0.184599	1.13698	PASS
292463	0.276039	1.10702	PASS
785154	0.255316	1.08879	PASS
ST105082	0.125623	1.08	PASS
ST024700	0.187187	1.08	PASS
330500	0.272249	1.04691	PASS
785164	0.0719233	1.03086	PASS
ST097542	0.281095	1.02	PASS
ST057702	0.133046	1.00922	PASS
785189	0.0841624	0.995201	PASS
51351	0.117347	0.990199	PASS
785145	0.0261595	0.98885	PASS
785167	0.211145	0.983784	PASS
785159	0.15507	0.983433	PASS
ST028625	0.087994	0.98	PASS
247562	0.103102	0.972626	PASS
11866	0.178574	0.955412	PASS
785161	0.0231779	0.952612	PASS
785170	0.106078	0.940382	PASS
785177	0.0567747	0.939635	PASS
785179	0.0272757	0.922087	PASS
ST024728	0.0446135	0.92	PASS
ST056282	0.225505	0.92	PASS
31867	0.0961452	0.911443	PASS
ST097611	0.0414028	0.91	PASS
ST024731	0.0664751	0.91	PASS
ST098733	0.282431	0.91	PASS
785186	0.196427	0.892166	PASS
403169	0.269797	0.891053	PASS
ST059296	0.167189	0.88	PASS
ST090287	0.198023	0.859857	PASS
ST059293	0.248178	0.85	PASS
ST013878	0.29644	0.81	PASS
785163	0.0240472	0.8	PASS
ST056348	0.221135	0.76006	PASS
343256	0.0369017	0.746695	FAIL
ST069298	0.221767	0.745885	FAIL
ST088509	0.188936	0.73072	FAIL
ST075616	0.165761	0.712606	FAIL
ST086528	0.0648187	0.711233	FAIL
ST095762	0.143932	0.662737	FAIL
ST077137	0.107779	0.662445	FAIL
169517	0.0300738	0.627509	FAIL
107041	0.0867353	0.581561	FAIL
ST051792	0.141204	0.554182	FAIL
ST088437	0.230422	0.532506	FAIL
ST075549	0.210896	0.518031	FAIL
ST079546	0.214855	0.512433	FAIL
ST079066	0.285083	0.507732	FAIL
250682	0.156814	0.475526	FAIL
47147	0.0797614	0.474595	FAIL
248605	0.0382687	0.373427	FAIL
ST069355	0.039349	0.36	FAIL
ST074438	0.199419	0.332123	FAIL
114344	0.243615	0.328502	FAIL
ST077035	0.138475	0.324148	FAIL
5897	0.280053	0.266317	FAIL
85236	0.177645	0.256606	FAIL
302979	0.123659	0.207734	FAIL
ST069321	0.106818	0.15	FAIL
401005	0.0103947	0.107234	FAIL
177406	0.108983	0.0645725	FAIL
ST001455	0.273194	0.0519297	FAIL
70931	0.00966913	0.0109853	FAIL
26258	0.125744	0.00920865	FAIL
365793	0.00976579	0.00440367	FAIL
642099	0.0106347	0.00408031	FAIL
