# Supplementary material for: Coalescing beneficial host and deleterious antiparasitic actions as an antischistosomal strategy
Source: eLife. 2018 Jul 30;7:e35755. doi: 10.7554/eLife.35755 (PMC6095690; doi:10.7554/eLife.35755)
Supplement: Supplementary file 4. — Ingenuity Pathway Analysis (IPA) of transcripts differentially expressed in livers of PZQ (Sheet 1) and ergotamine (Sheet 2) treated mice relative to control infections. IPA generated activation Z-scores are shown if magnitude ≥2. KEGG pathway analysis of transcripts differentially expressed in livers of PZQ (Sheet 3) and ergotamine (Sheet 4) treated mice relative to control infections. [file elife-35755-supp4.xls]

## Sheet: 1. IPA ERG-vs-CTRL INF
Ingenuity Canonical Pathways	-log(p-value)	z-score	Molecules
FXR/RXR Activation	23.9		KNG1,ABCG8,APOB,APOC4,VTN,MTTP,CYP8B1,PON1,LCAT,ITIH4,FGFR4,LPL,ABCB11,HNF4A,SLCO1B3,BAAT,TTR,MLXIPL,APOM,SULT2A1,FOXA2,FGA,RXRA,FOXA3,RBP4,APOE,ABCG5,SLC10A1,APOH,APOF,NR1H4,ABCC2,AMBP,SLC22A7,HNF1A,SLC27A5,SAA1,AKT3,SERPINA1,GC,AGT,CYP27A1,AHSG,FETUB,SERPINF1,SERPINF2,ALB,APOA1,TF,NR5A2
LXR/RXR Activation	15.9	4.352	ABCG8,KNG1,APOE,SCD,ABCG5,APOB,APOH,APOF,IL1RL1,ABCG4,NR1H4,VTN,APOC4,AMBP,ABCA1,PON1,LCAT,ITIH4,NGFR,SAA1,LPL,SERPINA1,LBP,GC,IL1RAP,AGT,TTR,MLXIPL,APOM,ECHS1,AHSG,SERPINF1,SERPINF2,IL18RAP,ALB,APOA1,TF,FGA,RXRA,RBP4
LPS/IL-1 Mediated Inhibition of RXR Function	14.7	-2.558	Sult3a1/Sult3a2,ABCG8,CYP3A7,SLC27A2,APOC4,ABCA1,HS6ST1,MAOB,ALDH1L1,GSTM2,CYP3A5,ACSL5,FABP1,ABCB11,IL1RAP,ALDH6A1,SLCO1B3,ALDH7A1,GSTK1,MGST1,ACOX2,ALDH8A1,SULT2A1,ALDH9A1,HS3ST3B1,SULT1E1,RXRA,ABCC4,NDST1,APOE,ABCG5,SLC10A1,IL1RL1,NR1H4,ABCC2,HS3ST3A1,ALDH2,SLC27A5,NGFR,GSTM4,CHST3,LBP,GSTM1,ACOX1,CHST12,Sult1d1,IL18RAP,MGST2,CAT,NR5A2,SULT1B1,ACSL1,CYP2C8,MAOA
Coagulation System	13.7		KNG1,F12,PROC,F7,F3,F2,SERPINF2,FGG,SERPIND1,F11,PLG,KLKB1,F10,SERPINC1,F9,F5,SERPINA1,FGB,FGA,F13B
Leukocyte Extravasation Signaling	12.6	-3.795	RAC2,MMP13,FGFR4,CYBA,PIK3CG,CYBB,ITGA4,ITK,PRKCQ,RDX,RAPGEF3,NCF4,ARHGAP5,NCF1,CLDN12,PRKCD,PLCG2,NCF2,ARHGAP35,VAV1,CLDN14,PIK3CD,SPN,PTK2B,PIK3R5,MMP25,KLB,RHOH,SIPA1,RASSF5,VASP,MMP19,VCAM1,CXCR4,ARHGAP4,ITGAL,SELPLG,BTK,ITGB2,WIPF1,ARHGAP9,WAS,CLDN1,VAV3,FER,CD44,CLDN2,CLDN3,PRKCB
Extrinsic Prothrombin Activation Pathway	10.5		F10,F12,SERPINC1,PROC,F5,FGB,F7,FGA,F13B,F3,FGG,F2
CD28 Signaling in T Helper Cells	9.57	-3.8	HLA-DOA,HLA-A,CD4,PIK3R5,HLA-DQA1,HLA-DQB1,KLB,NFATC1,PTPRC,CD28,LCK,PAK1,ACTR3,HLA-DMA,PIK3CG,FGFR4,HLA-DMB,AKT3,ITK,PTPN6,PRKCQ,MALT1,CD3G,WAS,CARD11,GRAP2,SYK,ITPR3,LAT,HLA-DOB,VAV1,PIK3CD,LCP2
Antigen Presentation Pathway	9.53		B2M,PSMB9,CALR,HLA-DOA,HLA-A,CIITA,HLA-DQA1,PSMB8,CD74,HLA-DQB1,PSMB6,TAP1,HLA-G,NLRC5,HLA-DMA,HLA-DMB,HLA-DOB
iCOS-iCOSL Signaling in T Helper Cells	8.49	-3.402	HLA-DOA,HLA-A,CD4,PIK3R5,HLA-DQA1,HLA-DQB1,KLB,NFATC1,PTPRC,CD28,LCK,HLA-DMA,PIK3CG,FGFR4,HLA-DMB,AKT3,IL2RB,CAMK2B,ITK,IL2RG,PRKCQ,INPP5D,CD3G,GRAP2,ITPR3,LAT,HLA-DOB,VAV1,PIK3CD,LCP2
Acute Phase Response Signaling	8.25		ITIH3,APOH,AMBP,SERPINA3,HNF1A,FGG,F2,SERPIND1,MBL2,ITIH2,APCS,ITIH4,NGFR,PIK3CG,SAA1,AKT3,SERPINA1,FGB,LBP,IL1RAP,AGT,TTR,AHSG,SERPINF1,SAA2-SAA4,SERPINF2,C5,PLG,KLKB1,ALB,APOA1,TF,CRP,PIK3CD,FGA,RBP4
Superpathway of Melatonin Degradation	7.96		UGT2B28,CYP3A7,CYP4F8,UGT3A1,UGT1A6,Cyp2c40 (includes others),UGT2B17,CYP2U1,Sult1d1,UGT1A1,SULT2A1,MAOB,CYP1A2,MPO,SULT1E1,CYP3A5,CYP2E1,CYP2J2,SULT1B1,MAOA,CYP2C8
Role of Tissue Factor in Cancer	7.87		PTK2B,PIK3R5,MMP13,F7,KLB,FGG,F2,YES1,LCK,PAK1,ARRB1,FGFR4,PIK3CG,HCK,AKT3,FGB,RPS6KA2,FGR,EGFR,PDIA2,P4HB,CASP3,RPS6KA5,F3,F10,ARRB2,PIK3CD,RPS6KA1,FGA
Atherosclerosis Signaling	7.54		CCR3,APOE,APOB,APOF,APOC4,MMP13,ALOX12,CCR2,PLA2G7,PON1,LCAT,LPL,SERPINA1,PLA2G12B,COL18A1,ITGA4,ALOX15,VCAM1,APOM,CXCR4,F3,SELPLG,ITGB2,ALB,APOA1,PLA2G2D,ALOX5,TNFSF14,RBP4
Xenobiotic Metabolism Signaling	7.51		UGT2B28,Sult3a1/Sult3a2,CYP3A7,UGT1A6,ABCC2,PIK3R5,KLB,HS3ST3A1,ALDH2,HS6ST1,ALDH1L1,MAOB,CYP1A2,GSTM2,CYP3A5,PIK3CG,FGFR4,GSTM4,CHST3,ALDH6A1,GSTK1,CAMK2B,ALDH7A1,MAP3K9,GSTM1,SRA1,MGST1,PRKCQ,UGT2B17,CES3,ALDH8A1,CHST12,Sult1d1,UGT1A1,SULT2A1,ALDH9A1,HS3ST3B1,Ces1e,SULT1E1,MGST2,PRKCD,CAT,PIK3CD,RXRA,NDST1,SULT1B1,CYP2C8,MAOA,PRKCB
Fcγ Receptor-mediated Phagocytosis in Macrophages and Monocytes	7.43	-3.674	RAC2,PRKCQ,PTK2B,FYB1,INPP5D,YES1,PAK1,NCF1,CBL,ACTR3,WAS,VAV3,SYK,PRKCD,PIK3CG,GPLD1,HCK,AKT3,VAV1,FCGR3A/FCGR3B,LCP2,VASP,FGR,PRKCB
PKCθ Signaling in T Lymphocytes	7.4	-3.78	CACNA1I,RAC2,HLA-DOA,HLA-A,CD4,CACNA1H,PIK3R5,HLA-DQA1,HLA-DQB1,KLB,NFATC1,CD28,LCK,CACNA1E,HLA-DMA,PIK3CG,FGFR4,HLA-DMB,CACNA2D4,CAMK2B,MAP3K9,PRKCQ,MALT1,CD3G,CARD11,GRAP2,PLCG2,VAV3,LAT,HLA-DOB,VAV1,PIK3CD,LCP2
Heparan Sulfate Biosynthesis (Late Stages)	7.25		Ces2a,Sult3a1/Sult3a2,CES3,NOTUM,CHST12,Sult1d1,SULT2A1,HS3ST3A1,PRDX6,HS6ST1,Ces1e,HS3ST3B1,AADAC,SULT1E1,Ces1b/Ces1c,CHST3,EXTL3,AARS,NDST1,EXTL1,SULT1B1
PXR/RXR Activation	6.95		CYP3A7,GSTM1,SCD,ABCC2,CES3,PRKAR2A,UGT1A1,SULT2A1,GSTM2,PRKAR2B,CYP1A2,CYP3A5,AKT3,ABCB11,INSR,HNF4A,RXRA,SLCO1B3,CYP2C8
Intrinsic Prothrombin Activation Pathway	6.89	3.051	KNG1,F12,PROC,F2,FGG,F11,KLKB1,F10,SERPINC1,F9,F5,FGB,FGA,COL18A1,F13B
Production of Nitric Oxide and Reactive Oxygen Species in Macrophages	6.71		APOE,APOB,APOF,APOC4,PIK3R5,RHOH,KLB,SPI1,PON1,RHOG,CYBA,NGFR,PIK3CG,FGFR4,CYBB,AKT3,SERPINA1,STAT1,MAP3K9,PTPN6,APOM,PRKCQ,NCF4,NCF1,ALB,APOA1,MPO,PRKCD,PLCG2,NCF2,CAT,PIK3CD,IRF8,FNBP1,RBP4,PRKCB
Heparan Sulfate Biosynthesis	6.53		Ces2a,Sult3a1/Sult3a2,CES3,NOTUM,CHST12,Sult1d1,SULT2A1,HS3ST3A1,PRDX6,HS6ST1,Ces1e,HS3ST3B1,AADAC,SULT1E1,Ces1b/Ces1c,CHST3,EXTL3,AARS,NDST1,EXTL1,SULT1B1
Serotonin Degradation	6.45		UGT2B28,HSD17B10,UGT3A1,UGT1A6,UGT2B17,Sult1d1,UGT1A1,SULT2A1,ALDH9A1,ADH5,ALDH2,MAOB,ALDH1L1,ADH7,SULT1E1,ADHFE1,SULT1B1,MAOA,ALDH7A1,ADH4
Melatonin Degradation I	6.34		UGT2B28,CYP3A7,CYP4F8,UGT3A1,UGT1A6,Cyp2c40 (includes others),UGT2B17,CYP2U1,Sult1d1,UGT1A1,SULT2A1,SULT1E1,CYP1A2,CYP3A5,CYP2E1,CYP2J2,SULT1B1,CYP2C8
Hepatic Cholestasis	6.29		ABCG8,ABCG5,GCGR,SLC10A1,IL1RL1,NR1H4,ABCC2,SLC22A7,HNF1A,HSD3B7,CYP8B1,ATP8B1,NGFR,FGFR4,ABCB11,LBP,HNF4A,IL1RAP,SLCO1B3,MAP4K2,CYP7B1,PRKCQ,CYP27A1,PRKAR2A,IL18RAP,PRKAR2B,PRKCD,NR5A2,INSR,RXRA,PRKCB
Role of NFAT in Regulation of the Immune Response	6.21	-4.243	BLNK,PLCB2,HLA-DOA,HLA-A,CD4,PIK3R5,HLA-DQA1,HLA-DQB1,KLB,NFATC1,CD28,LCK,GNAT1,HLA-DMA,PIK3CG,FGFR4,HLA-DMB,AKT3,FCGR3A/FCGR3B,ITK,PRKCQ,CD79B,GNG2,BTK,CD3G,PLCG2,SYK,ITPR3,LAT,MS4A2,HLA-DOB,MEF2C,PIK3CD,LCP2
Bile Acid Biosynthesis, Neutral Pathway	6.13		BAAT,AMACR,SLC27A5,CYP27A1,AKR1D1,AKR1C4,HSD3B7,CYP8B1
T Cell Receptor Signaling	6.05		PTPN7,PRKCQ,CD4,PIK3R5,MALT1,CD8A,KLB,NFATC1,PTPRC,BTK,CD28,CD3G,LCK,CBL,GRAP2,CARD11,VAV3,FGFR4,PIK3CG,LAT,PIK3CD,VAV1,LCP2,ITK
Nicotine Degradation III	5.92		UGT2B28,CYP3A7,CYP4F8,UGT3A1,UGT1A6,Cyp2c40 (includes others),UGT2B17,CYP2U1,UGT1A1,ADH7,CYP1A2,CYP3A5,CYP2E1,CYP2J2,Aox3,CYP2C8
Tyrosine Degradation I	5.68		GSTZ1,HPD,TAT,HGD,FAH
Phagosome Formation	5.65		PLCB2,VTN,PIK3R5,NOTUM,KLB,RHOH,MBL2,RHOG,FGFR4,PIK3CG,TLR1,FCGR3A/FCGR3B,CR2,MARCO,ITGA4,PRKCQ,PLCL2,INPP5D,ITGB2,SYK,PLCG2,PRKCD,PIK3CD,FNBP1,PRKCB,ITGAX
Estrogen Biosynthesis	5.52		HSD17B10,CYP3A7,CYP4F8,Cyp2c40 (includes others),CYP2U1,CYP1A2,CYP3A5,CYP2E1,CYP2J2,AKR1C4,HSD17B4,HSD17B2,CYP2C8
B Cell Receptor Signaling	5.49	-3.413	BLNK,RAC2,PTK2B,POU2F2,PIK3R5,KLB,NFATC1,PTPRC,PIK3CG,FGFR4,CD22,AKT3,RASSF5,CAMK2B,MAP3K9,CD19,PTPN6,PRKCQ,CD79B,MALT1,INPP5D,BTK,EBF1,DAPP1,INPP5J,PLCG2,SYK,VAV3,MEF2C,PIK3CD,VAV1,BCL2A1,PRKCB
B Cell Development	5.41		PTPRC,IL7R,CD19,HLA-DOA,SPN,CD79B,HLA-DMA,HLA-A,HLA-DMB,HLA-DQA1,HLA-DOB,HLA-DQB1
PI3K Signaling in B Lymphocytes	5.14	-3.266	BLNK,PLCB2,NOTUM,NFATC1,PTPRC,PIK3CG,AKT3,CR2,CAMK2B,CD19,CD79B,PLCL2,MALT1,INPP5D,BTK,CBL,DAPP1,CD180,SYK,VAV3,PLCG2,ITPR3,PIK3CD,VAV1,PRKCB
Natural Killer Cell Signaling	5.14		RAC2,PTPN6,PRKCQ,TYROBP,PIK3R5,KLB,INPP5D,LCK,PAK1,INPP5J,VAV3,FGFR4,SYK,PIK3CG,PLCG2,PRKCD,LAT,CD244,AKT3,PIK3CD,VAV1,FCGR3A/FCGR3B,LCP2,PRKCB
Ethanol Degradation II	5.13		ADH5,HSD17B10,ALDH2,ALDH1L1,ADH7,ACSS2,ACSS1,ADHFE1,ACSL1,ALDH9A1,ADH4,ALDH7A1
Reelin Signaling in Neurons	5.06		APOE,MAP3K9,ARHGEF12,PIK3R5,ARHGEF1,KLB,ITGAL,CDK5R1,ITGB2,YES1,LCK,FGFR4,PIK3CG,ARHGEF6,HCK,MAP4K1,LRP8,PIK3CD,FGR,ITGA4
Nicotine Degradation II	4.98		UGT2B28,CYP3A7,CYP4F8,UGT3A1,UGT1A6,Cyp2c40 (includes others),UGT2B17,CYP2U1,UGT1A1,ADH7,CYP1A2,CYP3A5,CYP2E1,CYP2J2,Aox3,CYP2C8
Th2 Pathway	4.94	-2.5	CCR3,HLA-DOA,TNFSF4,HLA-A,IL1RL1,CD4,PIK3R5,HLA-DQA1,HLA-DQB1,KLB,SPI1,CD28,HLA-DMA,FGFR4,PIK3CG,HLA-DMB,IL2RB,IL2RG,PRKCQ,CXCR4,IKZF1,ITGB2,CD3G,GFI1,HLA-DOB,PIK3CD,VAV1
Th1 and Th2 Activation Pathway	4.92		CCR3,TNFSF4,HLA-DOA,HLA-A,IL1RL1,CD4,PIK3R5,HLA-DQA1,HLA-DQB1,CD8A,KLB,SPI1,NFATC1,CD28,HLA-DMA,PIK3CG,FGFR4,HLA-DMB,CD274,STAT1,IL2RB,IL2RG,PRKCQ,CXCR4,IKZF1,ITGB2,CD3G,GFI1,HLA-DOB,VAV1,PIK3CD
Fc Epsilon RI Signaling	4.82	-2.558	RAC2,PRKCQ,PIK3R5,KLB,INPP5D,BTK,INPP5J,PLA2G2D,GRAP2,VAV3,FGFR4,SYK,PRKCD,PIK3CG,PLCG2,LAT,MS4A2,AKT3,PIK3CD,VAV1,PLA2G12B,LCP2,PRKCB
IL-4 Signaling	4.72		PTPN6,HLA-DOA,IL2RG,IRF4,HLA-A,HLA-DQA1,PIK3R5,HLA-DQB1,KLB,NFATC1,INPP5D,INPP5J,HLA-DMA,FGFR4,PIK3CG,HLA-DMB,AKT3,HLA-DOB,PIK3CD
IL-12 Signaling and Production in Macrophages	4.7		APOE,APOB,APOF,APOC4,PIK3R5,MST1,ALOX12,KLB,SPI1,PON1,FGFR4,PIK3CG,AKT3,SERPINA1,STAT1,ALOX15,APOM,PRKCQ,ALB,APOA1,PRKCD,PIK3CD,IRF8,RXRA,RBP4,PRKCB
Glycine Betaine Degradation	4.61		SARDH,BHMT,DMGDH,SHMT1,BHMT2,SDS
CTLA4 Signaling in Cytotoxic T Lymphocytes	4.56		B2M,PTPN6,HLA-A,AP1S2,CLTB,PIK3R5,CD8A,KLB,CD28,CD3G,LCK,GRAP2,FGFR4,PIK3CG,SYK,LAT,AKT3,PIK3CD,PTPN22,LCP2
Primary Immunodeficiency Signaling	4.55		BLNK,PTPRC,IL7R,BTK,CD19,LCK,IL2RG,CD4,CIITA,TNFRSF13B,CD8A,TNFRSF13C,TAP1
Rac Signaling	4.45	-2.683	TIAM1,PTK2B,PIK3R5,WASF1,PIP5K1B,IQGAP1,KLB,CDK5R1,ANK1,IQGAP2,PAK1,CYFIP2,ACTR3,FGFR4,PIK3CG,NCF2,CYBB,CD44,PIK3CD,PARD3,PIP4K2A,ITGA4
Bupropion Degradation	4.39		CYP3A7,CYP4F8,CYP1A2,Cyp2c40 (includes others),CYP2E1,CYP3A5,CYP2U1,CYP2J2,CYP2C8
Tryptophan Degradation III (Eukaryotic)	4.39		HSD17B10,L3HYPDH,TDO2,HAAO,IDO2,CA1,HSD17B4,KYNU,GCDH
Tec Kinase Signaling	4.37	-3.922	PTK2B,PIK3R5,KLB,RHOH,YES1,LCK,PAK1,RHOG,GNAT1,FGFR4,PIK3CG,HCK,STAT1,FGR,ITGA4,ITK,PRKCQ,GNG2,BTK,WAS,VAV3,PLCG2,PRKCD,MS4A2,PIK3CD,VAV1,FNBP1,PRKCB
Calcium-induced T Lymphocyte Apoptosis	4.18	-3.357	HLA-DOA,PRKCQ,HLA-A,CD4,HLA-DQA1,ATP2A3,HLA-DQB1,CD3G,LCK,HLA-DMA,PRKCD,HLA-DMB,ITPR3,HLA-DOB,PRKCB
Altered T Cell and B Cell Signaling in Rheumatoid Arthritis	4.11		IL21,HLA-DOA,SLAMF1,CD79B,HLA-A,IL15,HLA-DQA1,LTB,HLA-DQB1,TNFRSF13C,TNFRSF17,CD28,CXCL13,HLA-DMA,HLA-DMB,TLR1,HLA-DOB,TNFRSF13B
Noradrenaline and Adrenaline Degradation	4		ADH5,HSD17B10,ALDH2,MAOB,ALDH1L1,ADH7,ADHFE1,ALDH9A1,MAOA,ADH4,ALDH7A1
IL-8 Signaling	3.98	-3.9	RAC2,PLCB2,PTK2B,PIK3R5,IQGAP1,RHOH,KLB,RHOG,PIK3CG,FGFR4,GPLD1,CYBB,AKT3,VASP,CR2,EGFR,VCAM1,PRKCQ,ANGPT1,GNG2,ITGB2,ARRB2,CCND2,MPO,PRKCD,NCF2,PIK3CD,FNBP1,PRKCB,ITGAX
GP6 Signaling Pathway	3.98		ITGA2B,PRKCQ,PIK3R5,KLB,FGG,BTK,RHOG,COL13A1,GRAP2,FGFR4,SYK,PRKCD,PIK3CG,PLCG2,LAT,AKT3,FGB,PIK3CD,KLF12,FGA,COL18A1,LCP2,PRKCB
Granulocyte Adhesion and Diapedesis	3.96		SELL,IL1RL1,MMP13,SDC4,CCL5,MMP25,Cxcl9,CXCL13,SDC2,NGFR,IL1RAP,ITGA4,MMP19,VCAM1,CXCR4,Ppbp,RDX,ITGAL,SELPLG,IL18RAP,C5,ITGB2,CXCL16,CLDN12,CLDN1,CLDN14,CLDN2,CLDN3
Growth Hormone Signaling	3.91		PTPN6,PRKCQ,IGFALS,PIK3R5,RPS6KA5,KLB,GHR,FGFR4,PIK3CG,PLCG2,PRKCD,CEBPA,PIK3CD,RPS6KA1,RPS6KA2,STAT1,PRKCB
Virus Entry via Endocytic Pathways	3.87		B2M,RAC2,PRKCQ,HLA-A,CLTB,PIK3R5,KLB,ITGAL,ITGB7,ITGB2,CD55,FGFR4,PIK3CG,PLCG2,PRKCD,TFRC,PIK3CD,ITGA4,PRKCB
Role of JAK1 and JAK3 in γc Cytokine Signaling	3.8		IL21,BLNK,IL2RG,FES,PTK2B,IL15,PIK3R5,KLB,IL7R,PIK3CG,SYK,FGFR4,PIK3CD,STAT1,IL2RB
Thyroid Hormone Metabolism II (via Conjugation and/or Degradation)	3.8		UGT2B28,SULT1E1,UGT3A1,UGT1A6,UGT2B17,Sult1d1,DIO2,UGT1A1,DIO3,SULT1B1,SULT2A1
Chondroitin Sulfate Biosynthesis (Late Stages)	3.79		Sult3a1/Sult3a2,HS6ST1,HS3ST3B1,CSGALNACT2,SULT1E1,CHST3,CHST12,Sult1d1,NDST1,HS3ST3A1,SULT1B1,SULT2A1
Valine Degradation I	3.77		HIBCH,ECHS1,ABAT,BCKDHA,DBT,SDS,ALDH6A1
Opioid Signaling Pathway	3.73	-2.121	CACNA1I,RAC2,RGS18,CLTB,SCN7A,CACNA1H,YES1,LCK,ARRB1,CACNA1E,RGS5,PIK3CG,RGS10,HCK,AKT3,RGS14,RPS6KA2,CACNA2D4,FGR,CAMK2B,SIGMAR1,RGS19,PRKCQ,RYR2,GNG2,PRKAR2A,RPS6KA5,ARRB2,PRKAR2B,PRKCD,ITPR3,GRK6,RPS6KA1,PRKCB
Citrulline Biosynthesis	3.69		OTC,GLS,OAT,GLS2,PRODH2
Acetone Degradation I (to Methylglyoxal)	3.69		CYP3A7,CYP4F8,CYP1A2,Cyp2c40 (includes others),CYP2E1,CYP3A5,CYP2U1,CYP2J2,CYP2C8
p70S6K Signaling	3.64		CD19,PLCB2,IL2RG,PRKCQ,CD79B,NOTUM,PIK3R5,PLCL2,KLB,F2,BTK,FGFR4,SYK,PRKCD,PIK3CG,PLCG2,AKT3,PIK3CD,EEF2K,PRKCB,EGFR,AGT
Aryl Hydrocarbon Receptor Signaling	3.64		GSTM1,MGST1,TFDP1,ALDH8A1,APAF1,RBL1,ALDH9A1,RB1,CCNA2,ALDH2,ALDH1L1,NCOA7,GSTM2,CYP1A2,CCND2,MGST2,GSTM4,DCT,RXRA,ALDH6A1,MCM7,ALDH7A1,GSTK1
Dopamine Degradation	3.62		ALDH2,MAOB,ALDH1L1,SULT1E1,Sult1d1,SULT1B1,SULT2A1,ALDH9A1,MAOA,ALDH7A1
Complement System	3.62	2	ITGB2,CD55,MASP2,MBL2,C8B,C8A,C8G,ITGAX,C5,CR2
Ubiquinol-10 Biosynthesis (Eukaryotic)	3.59		MICAL1,CYP7B1,CYP2E1,CYP26A1,BCKDHA,URAD,ECHDC1
Phenylalanine Degradation IV (Mammalian, via Side Chain)	3.56		ALDH2,MAOB,HPD,SLC27A2,GOT2,MAOA
Nur77 Signaling in T Lymphocytes	3.56		CD28,CD3G,HLA-DOA,CASP3,HLA-DMA,HLA-A,HLA-DMB,HLA-DQA1,APAF1,HLA-DOB,HLA-DQB1,RXRA,NFATC1
Ethanol Degradation IV	3.55		ALDH2,ALDH1L1,ACSS2,CAT,ACSS1,ACSL1,ALDH9A1,ALDH7A1
Clathrin-mediated Endocytosis Signaling	3.54		APOE,APOB,APOF,APOC4,CLTB,PIK3R5,KLB,ITGB7,F2,PON1,ARRB1,ACTR3,FGFR4,PIK3CG,SERPINA1,SH3KBP1,APOM,FGF1,UBD,MET,ITGB2,ARRB2,ALB,APOA1,CBL,TF,TFRC,PIK3CD,RBP4
TREM1 Signaling	3.52	-3.357	Naip1 (includes others),NLRP6,Nlrp1a,IL1RL1,TYROBP,CIITA,CD83,NLRC5,MPO,NLRC3,PLCG2,TLR1,CASP1,AKT3,ITGAX
Th1 Pathway	3.5	-2.828	HLA-DOA,PRKCQ,HLA-A,CD4,HLA-DQA1,PIK3R5,HLA-DQB1,CD8A,KLB,NFATC1,CD28,CD3G,ITGB2,HLA-DMA,FGFR4,PIK3CG,HLA-DMB,HLA-DOB,PIK3CD,CD274,VAV1,STAT1
Dermatan Sulfate Biosynthesis (Late Stages)	3.42		Sult3a1/Sult3a2,HS6ST1,HS3ST3B1,SULT1E1,CHST3,CHST12,Sult1d1,NDST1,HS3ST3A1,SULT1B1,SULT2A1
Dendritic Cell Maturation	3.41	-2.746	B2M,PLCB2,HLA-DOA,HLA-A,PIK3R5,HLA-DQA1,NOTUM,LTB,CD83,HLA-DQB1,KLB,HLA-DMA,NGFR,FGFR4,PIK3CG,HLA-DMB,AKT3,LY75,STAT1,COL18A1,FCGR3A/FCGR3B,TYROBP,IL15,PLCL2,PLCG2,HLA-DOB,PIK3CD,IRF8
Amyotrophic Lateral Sclerosis Signaling	3.38		NAIP,Naip1 (includes others),CASP3,APAF1,PIK3R5,SOD1,KLB,CCS,PAK1,CACNA1E,FGFR4,PIK3CG,CAT,CASP1,GLUL,AKT3,PIK3CD,BIRC3,GRIA3
Superpathway of Citrulline Metabolism	3.37		OTC,GLS,OAT,GLS2,PRODH2,CPS1
VDR/RXR Activation	3.33		SERPINB1,LRP5,PRKCQ,IL1RL1,PPARD,CCL5,SULT2A1,COL13A1,RUNX2,PRKCD,MXD1,CEBPA,RXRA,HSD17B2,PRKCB
Maturity Onset Diabetes of Young (MODY) Signaling	3.29		CACNA1E,ALDOB,FOXA2,FABP1,INSR,HNF4A,HNF1A
Oxidative Ethanol Degradation III	3.29		ALDH2,ALDH1L1,ACSS2,ACSS1,ACSL1,ALDH9A1,ALDH7A1
NF-κB Activation by Viruses	3.29	-3	PRKCQ,CD4,PIK3R5,ITGAL,KLB,ITGB2,LCK,FGFR4,PIK3CG,PRKCD,AKT3,PIK3CD,CXCR5,ITGA4,PRKCB,CR2
FcγRIIB Signaling in B Lymphocytes	3.27		BLNK,CACNA1I,CD79B,PIK3R5,CACNA1H,KLB,INPP5D,BTK,CACNA1E,FGFR4,PIK3CG,PLCG2,SYK,PIK3CD,CACNA2D4
Actin Cytoskeleton Signaling	3.24	-2.2	KNG1,RAC2,FGD3,MYLK3,PIK3R5,ARHGEF1,PIP5K1B,IQGAP1,KLB,F2,IQGAP2,PAK1,CYFIP2,ACTR3,PIK3CG,FGFR4,LBP,ITGA4,TIAM1,ARHGEF12,RDX,WASF1,FGF1,WAS,VAV3,ARHGEF6,ARHGAP35,PIK3CD,VAV1,NCKAP1L,PIP4K2A
Retinoate Biosynthesis I	3.24		ADH7,DHRS3,RDH10,RDH11,RDH16,ALDH8A1,Rdh7,AKR1C4,ADH4
Gαq Signaling	3.18	-2.041	RGS2,PLCB2,RGS18,PRKCQ,PTK2B,GNG2,PIK3R5,AVPR1A,KLB,RHOH,NFATC1,BTK,RHOG,FGFR4,PRKCD,PIK3CG,PLCG2,ITPR3,GPLD1,AKT3,PIK3CD,FNBP1,ADRA1B,PRKCB
Neuroinflammation Signaling Pathway	3.16	-3.536	B2M,Naip1 (includes others),HLA-DOA,HLA-A,PIK3R5,HLA-DQA1,MFGE8,IDE,HLA-DQB1,CCL5,KLB,NFATC1,HLA-DMA,PIK3CG,FGFR4,TLR1,HLA-DMB,CYBB,CASP1,AKT3,PLA2G12B,STAT1,BIRC3,GABRA3,VCAM1,CASP3,TYROBP,GLS,GABRP,PLA2G2D,PLCG2,SYK,CRP,NCF2,HLA-DOB,GLUL,PIK3CD,GJB1,SLC6A12
Chondroitin Sulfate Biosynthesis	3.14		Sult3a1/Sult3a2,HS6ST1,HS3ST3B1,CSGALNACT2,SULT1E1,CHST3,CHST12,Sult1d1,NDST1,HS3ST3A1,SULT1B1,SULT2A1
Sphingosine-1-phosphate Signaling	3.13		PLCB2,CASP3,PTK2B,NOTUM,PIK3R5,CASP4,PLCL2,RHOH,KLB,S1PR4,NAAA,RHOG,CASP2,FGFR4,PIK3CG,PLCG2,CASP1,AKT3,PIK3CD,FNBP1
Phospholipase C Signaling	3.11	-4.158	PEBP1,BLNK,PLCB2,ARHGEF1,RHOH,NFATC1,LCK,RHOG,HDAC11,GPLD1,PLA2G12B,ITGA4,ITK,ARHGEF12,PRKCQ,CD79B,GNG2,RAPGEF3,BTK,CD3G,PLA2G2D,GRAP2,PRKCD,PLCG2,SYK,ITPR3,ARHGEF6,LAT,MEF2C,LCP2,FNBP1,PRKCB
Signaling by Rho Family GTPases	3.08	-2.921	PTK2B,PIK3R5,ARHGEF1,PIP5K1B,IQGAP1,RHOH,KLB,PAK1,RHOG,ACTR3,GNAT1,FGFR4,PIK3CG,CIT,CYBB,ITGA4,MAP3K9,ARHGEF12,GNG2,RDX,CDC42EP3,WASF1,PKN1,WIPF1,CDH2,WAS,NCF2,ARHGEF6,CDH17,PIK3CD,PARD3,PIP4K2A,FNBP1
Dermatan Sulfate Biosynthesis	3		Sult3a1/Sult3a2,HS6ST1,HS3ST3B1,CSGALNACT2,SULT1E1,CHST3,CHST12,Sult1d1,NDST1,HS3ST3A1,SULT1B1,SULT2A1
Neuroprotective Role of THOP1 in Alzheimer's Disease	2.99		HGFAC,KNG1,HLA-A,PRKAR2A,CTSG,F7,SERPINA3,IDE,Gzmb,ENDOU,HPN,F11,HLA-G,PLG,PRKAR2B,Prss34,HTRA2,ST14,AGT
Superpathway of Inositol Phosphate Compounds	2.99		PLCB2,NUDT12,PIK3R5,PIP5K1B,PPM1K,KLB,PTPRF,DUSP2,PTPRC,CA3,CD28,LCK,ACP6,FGFR4,PIK3CG,KIT,EGFR,PTPN7,CD19,PTPN6,ERBB3,INPP5D,MET,INPP5J,PPP1R16B,PLCG2,PPM1H,PIK3CD,VAV1,PIP4K2A,PTPN22
Stearate Biosynthesis I (Animals)	2.97		Ces1e,SLC27A5,SLC27A2,CYP2E1,ACSL5,ACOT1,DBT,ELOVL2,HNF4A,ACSL1
Superpathway of Methionine Degradation	2.95		CBS/CBSL,PCCA,BHMT,MAT1A,CDO1,CTH,MUT,BHMT2,GOT2
Docosahexaenoic Acid (DHA) Signaling	2.94		ALOX15,CASP3,PIK3CG,FGFR4,PIK3R5,SERPINF1,APAF1,AKT3,PIK3CD,BCL2A1,KLB
Glutathione Redox Reactions I	2.9		GSTZ1,GSTM1,MGST1,GSTM2,MGST2,PRDX6,GSTK1
Triacylglycerol Degradation	2.87		Ces2a,AADAC,Ces1e,Ces1b/Ces1c,CES3,LPL,NOTUM,LIPG,AARS,NDST1,PRDX6
Integrin Signaling	2.86	-3.402	RAC2,ITGA2B,MYLK3,PIK3R5,RHOH,KLB,ITGB7,ITGAE,PAK1,RHOG,ACTR3,PIK3CG,FGFR4,GRB7,AKT3,VASP,ITGA4,TSPAN5,ASAP1,ITGAL,ARHGAP5,ITGB2,WIPF1,LIMS1,WAS,PLCG2,PIK3CD,FNBP1,ITGAX
Glutathione-mediated Detoxification	2.86		Gstt3,GSTZ1,GSTM1,MGST1,GSTM2,MGST2,GSTM4,GSTK1
Phenylalanine Degradation I (Aerobic)	2.83		PAH,PCBD1,QDPR
Acetate Conversion to Acetyl-CoA	2.83		ACSS2,ACSS1,ACSL1
3-phosphoinositide Biosynthesis	2.82		NUDT12,PIK3R5,PIP5K1B,PPM1K,KLB,PTPRF,DUSP2,PTPRC,CD28,CA3,LCK,FGFR4,ACP6,PIK3CG,KIT,EGFR,PTPN7,PTPN6,CD19,ERBB3,MET,PPP1R16B,PPM1H,PIK3CD,VAV1,PIP4K2A,PTPN22
Glioma Signaling	2.81		PRKCQ,TFDP1,PIK3R5,RBL1,KLB,IDH1,RB1,CDKN2D,FGFR4,PIK3CG,PLCG2,PRKCD,AKT3,PIK3CD,E2F2,PRKCB,CAMK2B,EGFR
G Beta Gamma Signaling	2.81	-2.828	CACNA1I,PRKCQ,GNG2,PRKAR2A,CACNA1H,BTK,PAK1,CACNA1E,PRKAR2B,GNAT1,PRKCD,PIK3CG,PLCG2,ARHGEF6,AKT3,CACNA2D4,PRKCB,EGFR
Tryptophan Degradation to 2-amino-3-carboxymuconate Semialdehyde	2.8		TDO2,HAAO,IDO2,KYNU
Tryptophan Degradation X (Mammalian, via Tryptamine)	2.78		ALDH2,MAOB,ALDH1L1,DDC,ALDH9A1,MAOA,ALDH7A1
Fatty Acid β-oxidation I	2.76		HSD17B10,SLC27A5,ECHS1,SLC27A2,ACSL5,HSD17B4,SDS,ACSL1
Caveolar-mediated Endocytosis Signaling	2.76		B2M,ITGA2B,HLA-A,ITGAL,ITGB7,ITGAE,ITGB2,ALB,CD55,INSR,EGFR,ITGAX,ITGA4
Autoimmune Thyroid Disease Signaling	2.74		HLA-G,CD28,HLA-DOA,HLA-DMA,HLA-A,HLA-DMB,HLA-DQA1,HLA-DOB,HLA-DQB1,TG
NRF2-mediated Oxidative Stress Response	2.73		AKR7A2,PRDX1,PPIB,ABCC2,DNAJC6,PIK3R5,HSPB8,KLB,CLPP,GSTM2,FGFR4,PIK3CG,VCP,GSTM4,GSTK1,GSTM1,MGST1,PRKCQ,SOD1,MGST2,PRKCD,CAT,PIK3CD,SQSTM1,ABCC4,PRKCB
T Helper Cell Differentiation	2.64		IL21,CD28,IL2RG,HLA-DOA,HLA-DMA,HLA-A,NGFR,HLA-DMB,HLA-DQA1,HLA-DOB,CXCR5,HLA-DQB1,STAT1
GM-CSF Signaling	2.64		RUNX1,PIK3R5,KLB,CSF2RA,FGFR4,PIK3CG,HCK,AKT3,PIK3CD,BCL2A1,STAT1,CAMK2B,PRKCB
Androgen Biosynthesis	2.62		SRD5A2,HSD3B1,EBP,AKR1C4,HSD3B7
Cdc42 Signaling	2.6		B2M,FGD3,HLA-DOA,HLA-A,HLA-DQA1,HLA-DQB1,IQGAP1,HLA-G,CD3G,IQGAP2,PAK1,WIPF1,ACTR3,HLA-DMA,WAS,H2-M2,HLA-DMB,ARHGEF6,HLA-DOB,VAV1,PARD3,ITGA4,ITK
PPARα/RXRα Activation	2.5		PLCB2,GPD1,Cyp2c40 (includes others),IL1RL1,ACOX1,Cyp2c70,PRKAR2A,NOTUM,PLCL2,Cyp2c54 (includes others),ABCA1,IL18RAP,APOA1,GHR,PRKAR2B,PLCG2,LPL,MEF2C,INSR,RXRA,GOT2,IL1RAP,PRKCB,CYP2C8
Renin-Angiotensin Signaling	2.48	-2.183	PTPN6,PRKCQ,PTK2B,PRKAR2A,PIK3R5,CCL5,KLB,PAK1,PRKAR2B,FGFR4,PIK3CG,PLCG2,PRKCD,ITPR3,PIK3CD,STAT1,PRKCB,AGT
Histidine Degradation VI	2.47		MICAL1,CYP7B1,CYP2E1,CYP26A1,AMDHD1
Molecular Mechanisms of Cancer	2.47		RAC2,PLCB2,Naip1 (includes others),BMP4,PIK3R5,ARHGEF1,RBL1,RHOH,KLB,RB1,PAK1,RASGRF1,RHOG,GNAT1,PIK3CG,FGFR4,AKT3,BIRC3,E2F2,ITGA4,BMP1,CAMK2B,NAIP,LRP5,ARHGEF12,PRKCQ,TFDP1,CASP3,PRKAR2A,APAF1,RAPGEF3,CDKN2D,CCND2,PRKAR2B,MAX,CBL,CDK20,PRKCD,ARHGEF6,PIK3CD,CDK19,FNBP1,LRP1,PRKCB
Nitric Oxide Signaling in the Cardiovascular System	2.46		KNG1,PRKCQ,GUCY2C,RYR2,PRKAR2A,PIK3R5,ATP2A3,KLB,CACNA1E,PRKAR2B,FGFR4,PIK3CG,PRKCD,ITPR3,AKT3,PIK3CD,PRKCB
Lysine Degradation II	2.46		AADAT,AASS,ALDH7A1
Folate Polyglutamylation	2.46		SHMT1,FPGS,MTHFD1
Non-Small Cell Lung Cancer Signaling	2.43		TFDP1,PIK3R5,KLB,STK4,RB1,PIK3CG,FGFR4,ITPR3,AKT3,PIK3CD,RASSF5,RXRA,EGFR
Axonal Guidance Signaling	2.43		RAC2,ENPEP,PLCB2,BMP4,NOTUM,PIK3R5,MMP13,ADAM11,KLB,NFATC1,SEMA6C,PAK1,MICAL1,ACTR3,GNAT1,SDC2,NGFR,PIK3CG,FGFR4,NTNG2,MKNK1,ABLIM3,ADAM19,AKT3,PLXNB2,RASSF5,FARP2,VASP,BMP1,ITGA4,TUBB1,ARHGEF12,PRKCQ,KALRN,FES,CXCR4,GNG2,PRKAR2A,PLCL2,MET,WIPF1,SEMA4D,PRKAR2B,WAS,PLCG2,PRKCD,ARHGEF6,PIK3CD,PRKCB
Thrombin Signaling	2.4	-2.041	PLCB2,PRKCQ,ARHGEF12,GNG2,NOTUM,PIK3R5,ARHGEF1,PLCL2,GATA2,RHOH,KLB,F2,RHOG,GNAT1,PRKCD,PLCG2,PIK3CG,FGFR4,ITPR3,ARHGEF6,AKT3,PIK3CD,FNBP1,EGFR,CAMK2B,PRKCB
Systemic Lupus Erythematosus Signaling	2.39		KNG1,HLA-A,PIK3R5,C8A,KLB,NFATC1,PTPRC,HLA-G,CD28,LCK,FGFR4,PIK3CG,CD22,AKT3,FCGR3A/FCGR3B,LSM14B,PTPN6,CD79B,TNFRSF13C,INPP5D,C5,CD3G,CBL,PLCG2,LAT,C8B,PIK3CD,C8G
Neuropathic Pain Signaling In Dorsal Horn Neurons	2.38		PLCB2,PRKCQ,PRKAR2A,NOTUM,PIK3R5,PLCL2,KLB,PRKAR2B,FGFR4,PIK3CG,PLCG2,PRKCD,ITPR3,PIK3CD,PRKCB,CAMK2B,GRIA3
UVA-Induced MAPK Signaling	2.36		PLCB2,CASP3,NOTUM,PIK3R5,PARP8,RPS6KA5,PLCL2,KLB,FGFR4,PIK3CG,PLCG2,PIK3CD,RPS6KA2,RPS6KA1,STAT1,EGFR
HER-2 Signaling in Breast Cancer	2.34		PRKCQ,PIK3R5,ERBB3,KLB,ITGB7,ITGB2,FGFR4,PIK3CG,PRKCD,AKT3,PIK3CD,PARD3,EGFR,PRKCB
Glutaryl-CoA Degradation	2.34		HSD17B10,L3HYPDH,CA1,HSD17B4,GCDH
TR/RXR Activation	2.3		UCP2,PIK3R5,PFKP,KLB,DIO3,DIO2,F10,KLF9,FGFR4,PIK3CG,SLC16A2,AKT3,PIK3CD,RXRA,FGA
RhoGDI Signaling	2.29		ARHGEF12,GNG2,ARHGAP4,RDX,ARHGEF1,WASF1,PIP5K1B,RHOH,ARHGDIB,ARHGAP5,CDH2,PAK1,RHOG,ACTR3,ARHGAP9,GNAT1,ARHGEF6,CDH17,CD44,ARHGAP35,PIP4K2A,FNBP1,ITGA4
Putrescine Degradation III	2.28		ALDH2,MAOB,ALDH1L1,ALDH9A1,MAOA,ALDH7A1
Role of Pattern Recognition Receptors in Recognition of Bacteria and Viruses	2.28		PRKCQ,PIK3R5,Oas1b,CCL5,OAS3,RNASEL,KLB,C5,MBL2,FGFR4,SYK,PIK3CG,PLCG2,PRKCD,TLR1,CASP1,MAVS,PIK3CD,PRKCB
β-alanine Degradation I	2.27		ABAT,ALDH6A1
Glycine Biosynthesis III	2.27		AGXT,AGXT2
Cysteine Biosynthesis/Homocysteine Degradation	2.27		CBS/CBSL,CTH
Glutamine Degradation I	2.27		GLS,GLS2
Aldosterone Signaling in Epithelial Cells	2.25	-2	PLCB2,PRKCQ,HSPA14,DNAJC12,DNAJC6,NOTUM,HSPB8,PIK3R5,PIP5K1B,PLCL2,HSPD1,KLB,SCNN1A,FGFR4,PIK3CG,PLCG2,PRKCD,ITPR3,PIK3CD,DNAJC22,PIP4K2A,PRKCB
Erythropoietin Signaling	2.24		PTPN6,PRKCQ,EPOR,PIK3R5,KLB,CBL,FGFR4,PIK3CG,PLCG2,PRKCD,AKT3,PIK3CD,PRKCB
Macropinocytosis Signaling	2.24		PRKCQ,PIK3R5,KLB,ITGB7,MET,ITGB2,PAK1,FGFR4,PIK3CG,PLCG2,PRKCD,PIK3CD,PRKCB
MSP-RON Signaling Pathway	2.24		F11,ITGB2,KLKB1,F12,PIK3CG,FGFR4,PIK3R5,MST1,PIK3CD,RPS6KA2,CCR2,KLB
γ-linolenate Biosynthesis II (Animals)	2.21		SLC27A5,SLC27A2,ACSL5,CYB5A,ACSL1
Endothelin-1 Signaling	2.21	-2.041	PLCB2,PRKCQ,GUCY2C,CASP3,NOTUM,PIK3R5,CASP4,PLCL2,KLB,PLA2G7,GNAT1,LCAT,PLA2G2D,CASP2,FGFR4,PIK3CG,PLCG2,PRKCD,GPLD1,ITPR3,CASP1,PIK3CD,PLA2G12B,PRKCB
IL-2 Signaling	2.2	-2.111	IL2RG,LCK,PTK2B,PIK3CG,FGFR4,SYK,PIK3R5,AKT3,PIK3CD,KLB,IL2RB
Arginine Biosynthesis IV	2.18		OTC,OAT,GLUD1
Proline Biosynthesis II (from Arginine)	2.18		PADI4,OTC,OAT
Glycine Cleavage Complex	2.18		GCSH,GLDC,AMT
Type I Diabetes Mellitus Signaling	2.16		HLA-DOA,CASP3,HLA-A,APAF1,HLA-DQA1,HLA-DQB1,HSPD1,HLA-G,CD3G,CD28,HLA-DMA,NGFR,HLA-DMB,HLA-DOB,STAT1,IL1RAP
IL-3 Signaling	2.15		PTPN6,PRKCQ,PIK3R5,KLB,INPP5D,PAK1,FGFR4,PIK3CG,PRKCD,AKT3,PIK3CD,STAT1,PRKCB
Graft-versus-Host Disease Signaling	2.14		HLA-G,CD28,HLA-DOA,HLA-DMA,HLA-A,HLA-DMB,HLA-DQA1,HLA-DOB,HLA-DQB1
GPCR-Mediated Nutrient Sensing in Enteroendocrine Cells	2.13	-3	CACNA1I,PLCB2,PRKCQ,GNG2,PRKAR2A,NOTUM,CACNA1H,PLCL2,FFAR2,CACNA1E,PRKAR2B,PLCG2,PRKCD,ITPR3,CACNA2D4,PRKCB
Acute Myeloid Leukemia Signaling	2.12		RUNX1,FLT3,PIK3R5,SPI1,KLB,HNF1A,IDH1,CSF2RA,FGFR4,PIK3CG,CEBPA,AKT3,KIT,PIK3CD
fMLP Signaling in Neutrophils	2.08	-3.153	PLCB2,PRKCQ,GNG2,PIK3R5,KLB,NFATC1,NCF1,ACTR3,WAS,FGFR4,PIK3CG,PRKCD,NCF2,ITPR3,CYBB,PIK3CD,PRKCB
Communication between Innate and Adaptive Immune Cells	2.08		B2M,HLA-G,CD28,CD79B,HLA-A,CD4,TLR1,IL15,TNFRSF13B,CD83,CCL5,CD8A,TNFRSF13C,TNFRSF17
Pregnenolone Biosynthesis	2.06		MICAL1,CYP7B1,CYP2E1,CYP26A1
IL-15 Signaling	2.05		IL2RG,VCAM1,LCK,PIK3CG,FGFR4,SYK,IL15,PIK3R5,AKT3,PIK3CD,KLB,IL2RB
RhoA Signaling	2.05		ARHGEF12,PTK2B,ARHGAP4,MYLK3,RDX,CDC42EP3,RAPGEF6,WASF1,ARHGEF1,PIP5K1B,PKN1,ARHGAP5,ACTR3,ARHGAP9,CIT,ARHGAP35,PIP4K2A
P2Y Purigenic Receptor Signaling Pathway	2.05		PLCB2,ITGA2B,PRKCQ,P2RY4,GNG2,PRKAR2A,NOTUM,PIK3R5,PLCL2,KLB,PRKAR2B,FGFR4,PIK3CG,PLCG2,PRKCD,AKT3,PIK3CD,PRKCB
Lymphotoxin β Receptor Signaling	2.05	-2.111	VCAM1,CASP3,PIK3CG,FGFR4,PIK3R5,APAF1,LTB,AKT3,PIK3CD,KLB,TNFSF14
FLT3 Signaling in Hematopoietic Progenitor Cells	2.02		FLT3,PIK3R5,RPS6KA5,KLB,INPP5D,CBL,FGFR4,PIK3CG,AKT3,PIK3CD,RPS6KA2,RPS6KA1,STAT1
TNFR1 Signaling	2.02		MAP4K2,NAIP,Naip1 (includes others),PAK1,CASP3,CASP2,APAF1,TNFAIP3,BIRC3
Phosphatidylglycerol Biosynthesis II (Non-plastidic)	2.01		GPAM,LPCAT2,AGPAT2,PTPMT1,MBOAT1,AGPAT3
Retinol Biosynthesis	1.99		AADAC,Ces1e,DHRS3,RDH10,RDH11,CES3,LPL,LIPG
Sperm Motility	1.95		SLC16A10,PLCB2,PRKCQ,PTK2B,PRKAR2A,NOTUM,CACNA1H,PLCL2,PLA2G7,PRKAR2B,PLA2G2D,LCAT,PLCG2,PRKCD,ITPR3,PLA2G12B,PRKCB
ERK/MAPK Signaling	1.94	-2.858	RAC2,PTK2B,PRKAR2A,PIK3R5,RAPGEF3,RPS6KA5,KLB,NFATC1,DUSP2,ELF4,PAK1,PRKAR2B,PLA2G2D,FGFR4,PIK3CG,PLCG2,PRKCD,MKNK1,PIK3CD,RPS6KA1,PLA2G12B,STAT1,ITGA4,PRKCB
Serotonin Receptor Signaling	1.93		GCH1,MAOB,DDC,SPR,SLC18A2,PCBD1,MAOA,QDPR
Melanocyte Development and Pigmentation Signaling	1.93		PTPN6,PRKAR2A,PIK3R5,RPS6KA5,KLB,PRKAR2B,FGFR4,PIK3CG,PLCG2,KIT,PIK3CD,DCT,RPS6KA2,RPS6KA1
Fatty Acid Activation	1.92		SLC27A5,SLC27A2,ACSL5,ACSL1
Oleate Biosynthesis II (Animals)	1.92		SCD,FADS6,CYB5A,ALDH6A1
Glioma Invasiveness Signaling	1.91		PLG,RHOG,PIK3CG,FGFR4,VTN,CD44,PIK3R5,PIK3CD,KLB,RHOH,FNBP1
CREB Signaling in Neurons	1.91	-2.065	CACNA1I,PLCB2,PRKCQ,GNG2,CACNA1H,PRKAR2A,NOTUM,PIK3R5,PLCL2,KLB,CACNA1E,PRKAR2B,GNAT1,PRKCD,PLCG2,PIK3CG,FGFR4,ITPR3,AKT3,PIK3CD,RPS6KA1,CACNA2D4,CAMK2B,GRIA3,PRKCB
Agranulocyte Adhesion and Diapedesis	1.9		VCAM1,SELL,CXCR4,Ppbp,RDX,MMP13,SDC4,CCL5,MMP25,Cxcl9,ITGB7,SELPLG,C5,CXCL16,ITGB2,CXCL13,CLDN12,CLDN1,CLDN14,CLDN2,CLDN3,ITGA4,MMP19
Granzyme A Signaling	1.89		HIST1H1C,NME1,Hist1h1e,HIST1H1D,HMGB2
Role of Macrophages, Fibroblasts and Endothelial Cells in Rheumatoid Arthritis	1.89		PLCB2,SFRP2,IL1RL1,PIK3R5,NOTUM,LTB,MMP13,CCL5,HNF1A,KLB,NFATC1,NGFR,PIK3CG,FGFR4,TLR1,CEBPA,AKT3,IL1RAP,FCGR3A/FCGR3B,CAMK2B,VCAM1,LRP5,PRKCQ,IL15,PLCL2,IL18RAP,CEBPE,C5,IL16,PRKCD,PLCG2,PIK3CD,LRP1,PRKCB
PTEN Signaling	1.88		RAC2,CASP3,PIK3R5,INPP5D,MAGI1,CBL,GHR,INPP5J,FGFR4,PIK3CG,NGFR,AKT3,PIK3CD,INSR,ITGA4,EGFR
Phospholipases	1.85		PLCB2,LCAT,PLA2G2D,PLCG2,GPLD1,NOTUM,LIPG,PLCL2,PLA2G12B,PLA2G7
OX40 Signaling Pathway	1.83		B2M,HLA-G,CD3G,TNFSF4,HLA-DOA,HLA-DMA,HLA-A,H2-M2,CD4,HLA-DMB,HLA-DQA1,HLA-DOB,HLA-DQB1
IL-7 Signaling Pathway	1.83		IL2RG,PIK3R5,KLB,NFATC1,IL7R,MET,EBF1,FGFR4,PIK3CG,AKT3,PIK3CD,CXCR5,STAT1
14-3-3-mediated Signaling	1.82	-2.324	TUBB1,PLCB2,PRKCQ,NOTUM,PIK3R5,PLCL2,KLB,CBL,FGFR4,PIK3CG,PLCG2,PRKCD,AKT3,PIK3CD,RPS6KA1,AKT1S1,PRKCB
L-carnitine Biosynthesis	1.82		BBOX1,ALDH9A1
Methylglyoxal Degradation I	1.82		HAGH,GLO1
Thyronamine and Iodothyronamine Metabolism	1.82		DIO2,DIO3
Tetrahydrobiopterin Biosynthesis I	1.82		GCH1,SPR
D-glucuronate Degradation I	1.82		DCXR,CRYL1
Methionine Salvage II (Mammalian)	1.82		BHMT,BHMT2
4-hydroxyproline Degradation I	1.82		HOGA1,GOT2
Thiosulfate Disproportionation III (Rhodanese)	1.82		MPST,TST
Thyroid Hormone Metabolism I (via Deiodination)	1.82		DIO2,DIO3
Tetrahydrobiopterin Biosynthesis II	1.82		GCH1,SPR
Tyrosine Biosynthesis IV	1.82		PAH,PCBD1
Triacylglycerol Biosynthesis	1.76		GPAM,LPCAT2,AGPAT2,DGAT2,MBOAT1,DBT,ELOVL2,AGPAT3
Type II Diabetes Mellitus Signaling	1.76		CACNA1I,PRKCQ,SLC27A2,PIK3R5,CACNA1H,KLB,SLC27A5,CACNA1E,FGFR4,NGFR,PIK3CG,PRKCD,ACSL5,AKT3,PIK3CD,INSR,CACNA2D4,ACSL1,PRKCB
Unfolded protein response	1.76		PDIA2,CALR,P4HB,SCAP,HSPA14,VCP,CEBPA,OS9,CEBPE
Paxillin Signaling	1.75		ITGA2B,PTK2B,PIK3R5,KLB,ITGAL,ITGB7,ITGAE,ITGB2,PAK1,FGFR4,PIK3CG,ARHGEF6,PIK3CD,ITGA4,ITGAX
CXCR4 Signaling	1.75	-3.3	PLCB2,PRKCQ,CXCR4,CD4,GNG2,PIK3R5,KLB,RHOH,PAK1,RHOG,GNAT1,FGFR4,PIK3CG,PRKCD,ITPR3,AKT3,PIK3CD,ELMO1,FNBP1,PRKCB
Role of NFAT in Cardiac Hypertrophy	1.75	-2.6	CACNA1I,PLCB2,PRKCQ,GNG2,CACNA1H,PRKAR2A,NOTUM,PIK3R5,PLCL2,KLB,CTF1,CACNA1E,PRKAR2B,PRKCD,PLCG2,PIK3CG,FGFR4,HDAC11,ITPR3,AKT3,MEF2C,PIK3CD,CACNA2D4,CAMK2B,PRKCB
Thrombopoietin Signaling	1.72		PRKCQ,PLCG2,PIK3CG,FGFR4,PRKCD,PIK3R5,PIK3CD,STAT1,KLB,PRKCB
Netrin Signaling	1.72		CACNA1I,RAC2,PRKAR2B,CACNA1E,RYR2,ABLIM3,CACNA1H,PRKAR2A,CACNA2D4,NFATC1
Actin Nucleation by ARP-WASP Complex	1.71	-2.121	WIPF1,ACTR3,RHOG,WAS,WASF1,RHOH,FNBP1,VASP,ITGA4
NAD biosynthesis II (from tryptophan)	1.69		TDO2,HAAO,IDO2,KYNU
HGF Signaling	1.69	-2.138	MAP3K9,PRKCQ,PIK3R5,KLB,MET,ELF4,PAK1,FGFR4,PIK3CG,PLCG2,PRKCD,AKT3,PIK3CD,ITGA4,PRKCB
CCR5 Signaling in Macrophages	1.68	-2.449	CACNA1I,CD3G,PRKCQ,CACNA1E,PTK2B,CD4,PRKCD,PLCG2,GNG2,CACNA1H,CCL5,CACNA2D4,PRKCB
UVB-Induced MAPK Signaling	1.68		PRKCQ,PIK3CG,FGFR4,PRKCD,PIK3R5,PIK3CD,RPS6KA5,KLB,PRKCB,EGFR
Leptin Signaling in Obesity	1.65		PLCB2,PRKAR2B,PLCG2,PIK3CG,FGFR4,PRKAR2A,NOTUM,PIK3R5,AKT3,PIK3CD,PLCL2,KLB
Angiopoietin Signaling	1.58		PAK1,GRB14,ANGPT1,DOK2,PIK3CG,FGFR4,GRB7,PIK3R5,AKT3,PIK3CD,KLB
VEGF Family Ligand-Receptor Interactions	1.58		PRKCQ,PLA2G2D,PLCG2,PIK3CG,FGFR4,PRKCD,PIK3R5,AKT3,PIK3CD,PLA2G12B,KLB,PRKCB
eNOS Signaling	1.57		KNG1,CHRNA4,PRKCQ,CASP3,HSPA14,PRKAR2A,PIK3R5,AQP8,KLB,CCNA2,AQP9,PRKAR2B,FGFR4,PIK3CG,PLCG2,PRKCD,ITPR3,AKT3,PIK3CD,PRKCB
CDP-diacylglycerol Biosynthesis I	1.56		GPAM,LPCAT2,AGPAT2,MBOAT1,AGPAT3
FAK Signaling	1.55		ASAP1,PIK3R5,KLB,PAK1,WAS,FGFR4,PIK3CG,PLCG2,ARHGEF6,AKT3,PIK3CD,EGFR,ITGA4
Gap Junction Signaling	1.55		TUBB1,PLCB2,PRKCQ,GUCY2C,PRKAR2A,NOTUM,PIK3R5,PLCL2,KLB,PRKAR2B,FGFR4,PRKCD,PIK3CG,PLCG2,ITPR3,AKT3,PIK3CD,GJB1,GJB2,PRKCB,EGFR,GRIA3
Estrogen-Dependent Breast Cancer Signaling	1.55		HSD17B10,PIK3CG,FGFR4,PIK3R5,AKT3,PIK3CD,AKR1C4,HSD17B4,KLB,HSD17B2,EGFR
Arsenate Detoxification I (Glutaredoxin)	1.54		AS3MT,PNP
Uracil Degradation II (Reductive)	1.54		DPYD,UPB1
Branched-chain α-keto acid Dehydrogenase Complex	1.54		BCKDHA,DBT
Methylmalonyl Pathway	1.54		PCCA,MUT
α-tocopherol Degradation	1.54		CYP4F12,CYP4F2
Thymine Degradation	1.54		DPYD,UPB1
Melatonin Degradation II	1.54		MAOB,MAOA
L-cysteine Degradation I	1.54		CDO1,GOT2
Ephrin A Signaling	1.53		PAK1,VAV3,PIK3CG,FGFR4,NGFR,PIK3R5,VAV1,PIK3CD,KLB
Synaptic Long Term Depression	1.53	-2.236	CACNA1I,PLCB2,PRKCQ,GUCY2C,RYR2,NOTUM,CACNA1H,PLCL2,PLA2G7,CACNA1E,GNAT1,LCAT,PLA2G2D,PLCG2,PRKCD,ITPR3,PLA2G12B,CACNA2D4,PRKCB,GRIA3
Regulation of Actin-based Motility by Rho	1.51	-2.887	RAC2,WIPF1,PAK1,ACTR3,RHOG,WAS,WASF1,PIP5K1B,PIP4K2A,RHOH,FNBP1,ITGA4
Apoptosis Signaling	1.51		NAIP,Naip1 (includes others),PRKCQ,CASP3,PLCG2,CASP2,APAF1,HTRA2,RPS6KA1,BCL2A1,BIRC3,AIFM1
Mitochondrial L-carnitine Shuttle Pathway	1.5		SLC27A5,SLC27A2,ACSL5,ACSL1
Melatonin Signaling	1.44		PLCB2,PRKCQ,PRKAR2B,PLCG2,PRKCD,PRKAR2A,NOTUM,PLCL2,PRKCB,CAMK2B
ErbB4 Signaling	1.44		PRKCQ,Nrg1,PLCG2,PIK3CG,FGFR4,PRKCD,PIK3R5,PIK3CD,KLB,PRKCB
Semaphorin Signaling in Neurons	1.42		MET,PAK1,ARHGEF12,SEMA4D,RHOG,FES,RHOH,FNBP1
Estrogen-mediated S-phase Entry	1.42		RB1,CCNA2,TFDP1,RBL1,E2F2
RAR Activation	1.42		SRA1,DHRS3,PRKCQ,RDH10,RDH11,CYP26A1,PRKAR2A,Rdh7,ADH7,PRKAR2B,PRKCD,PIK3CG,RDH16,AKT3,PIK3CD,SORBS3,NR2F6,RXRA,PRKCB,ADH4,RBP4
CNTF Signaling	1.41		PIK3CG,FGFR4,PIK3R5,PIK3CD,RPS6KA5,RPS6KA1,RPS6KA2,STAT1,KLB
Prolactin Signaling	1.41		PRKCQ,PLCG2,PIK3CG,FGFR4,PRKCD,PIK3R5,PIK3CD,PRLR,STAT1,KLB,PRKCB
SAPK/JNK Signaling	1.4	-2.496	MAP4K2,SH2D2A,RAC2,MAP3K9,GNG2,PIK3R5,KLB,NFATC1,LCK,FGFR4,PIK3CG,MAP4K1,PIK3CD
Mineralocorticoid Biosynthesis	1.38		HSD3B1,EBP,HSD3B7
Allograft Rejection Signaling	1.38		B2M,HLA-G,CD28,HLA-DOA,HLA-DMA,HLA-A,H2-M2,HLA-DMB,HLA-DQA1,HLA-DOB,HLA-DQB1
NF-κB Signaling	1.37		BMP4,PRKCQ,PIK3R5,TNFAIP3,MALT1,KLB,TNFRSF17,LCK,GHR,CARD11,FGFR4,NGFR,PIK3CG,PLCG2,TLR1,AKT3,PIK3CD,INSR,PRKCB,EGFR
IL-9 Signaling	1.36		IL2RG,PIK3CG,FGFR4,PIK3R5,PIK3CD,STAT1,KLB
Small Cell Lung Cancer Signaling	1.34		RB1,MAX,TFDP1,PIK3CG,FGFR4,PIK3R5,APAF1,AKT3,PIK3CD,RXRA,KLB
Histamine Degradation	1.34		ALDH2,ALDH1L1,ALDH9A1,ALDH7A1
Eumelanin Biosynthesis	1.34		DDT,DCT
Lysine Degradation V	1.34		AADAT,ALDH7A1
2-oxobutanoate Degradation I	1.34		PCCA,MUT
GDNF Family Ligand-Receptor Interactions	1.3		DOK2,PLCG2,PIK3CG,FGFR4,GFRA1,ITPR3,PIK3R5,PIK3CD,DOK3,KLB
Glioblastoma Multiforme Signaling	1.3		PLCB2,NOTUM,PIK3R5,PLCL2,RHOH,KLB,RB1,RHOG,FGFR4,PIK3CG,PLCG2,PRKCD,ITPR3,AKT3,PIK3CD,FNBP1,E2F2,EGFR

## Sheet: 2. IPA PZQ-vs-CTRL INF
Ingenuity Canonical Pathways	-log(p-value)	z-score	Molecules
LPS/IL-1 Mediated Inhibition of RXR Function	21.9	-3.153	ABCG8,PPARA,APOE,ALDH4A1,CYP3A7,ABCG5,SLC10A1,SLC27A2,GSTM5,NR1H4,APOC4,ABCC2,SOD3,ALDH2,MAOB,SLC27A5,ALDH1L1,ALDH1A1,CYP3A5,CYP7A1,FABP4,CYP2A6 (includes others),IL1RAP,ALDH5A1,ALDH6A1,SLCO1B3,GSTK1,ALDH7A1,GSTA3,ALDH1B1,SULT1C2,ACOX1,ALDH8A1,Sult1d1,SULT2A1,IL18RAP,Cyp2a12/Cyp2a22,SREBF1,CAT,CYP2B6,ABCC3,ACSL1,SULT1B1,CYP2C8
Superpathway of Melatonin Degradation	18.3		UGT2B28,CYP3A7,CYP4F8,UGT3A1,UGT1A6,SULT1C2,UGT2B7,UGT2B17,UGT2B10,UGT1A4,Sult1d1,SULT2A1,MAOB,CYP2F1,CYP1A2,MPO,UGT2A3,CYP3A5,CYP2E1,CYP2A6 (includes others),CYP2B6,UGT1A7 (includes others),SULT1B1,CYP2C8
Melatonin Degradation I	16.7		UGT2B28,CYP3A7,CYP4F8,UGT3A1,UGT1A6,UGT2B7,UGT2B17,SULT1C2,UGT2B10,UGT1A4,Sult1d1,SULT2A1,CYP2F1,CYP1A2,UGT2A3,CYP3A5,CYP2E1,CYP2A6 (includes others),CYP2B6,UGT1A7 (includes others),SULT1B1,CYP2C8
Serotonin Degradation	16		UGT2B28,ALDH1B1,ALDH4A1,UGT3A1,UGT1A6,UGT2B7,UGT2B17,SULT1C2,UGT2B10,UGT1A4,Sult1d1,SULT2A1,ALDH2,MAOB,ADH7,ALDH1L1,ALDH1A1,UGT2A3,PECR,ADHFE1,UGT1A7 (includes others),SULT1B1,ALDH7A1
Nicotine Degradation III	15.8		UGT2B28,CYP3A7,CYP4F8,UGT3A1,UGT1A6,UGT2B7,UGT2B17,UGT2B10,UGT1A4,CYP2F1,ADH7,CYP1A2,UGT2A3,CYP3A5,CYP2E1,CYP2A6 (includes others),CYP2B6,UGT1A7 (includes others),CYP2C8,Aox3
Nicotine Degradation II	15.5		UGT2B28,CYP3A7,CYP4F8,UGT3A1,UGT1A6,UGT2B7,UGT2B17,UGT2B10,INMT,UGT1A4,CYP2F1,ADH7,CYP1A2,UGT2A3,CYP3A5,CYP2E1,CYP2A6 (includes others),CYP2B6,UGT1A7 (includes others),CYP2C8,Aox3
FXR/RXR Activation	13.6		PPARA,ABCG8,APOE,ABCG5,SLC10A1,NR1H4,APOC4,ABCC2,APOA2,CYP8B1,PON1,SLC27A5,FGFR4,CYP7A1,SERPINA1,GC,SLCO1B3,BAAT,TTR,MLXIPL,CYP27A1,SERPINF1,SULT2A1,ALB,SREBF1,FOXA2
Xenobiotic Metabolism Signaling	13.5		UGT2B28,ALDH4A1,CYP3A7,UGT1A6,GSTM5,UGT2B7,NQO2,ABCC2,SOD3,ALDH2,MAOB,ALDH1L1,CYP1A2,CES1,ALDH1A1,CYP3A5,FGFR4,ALDH5A1,ALDH6A1,GSTK1,ALDH7A1,GSTA3,ALDH1B1,SULT1C2,UGT2B17,CES3,ALDH8A1,UGT2B10,Sult1d1,UGT1A4,SULT2A1,ESD,Ces1e,CAT,CYP2B6,ABCC3,SULT1B1,UGT1A7 (includes others),CYP2C8
Thyroid Hormone Metabolism II (via Conjugation and/or Degradation)	10.6		UGT2B28,UGT3A1,UGT1A6,UGT2B7,UGT2B17,SULT1C2,UGT2B10,UGT1A4,Sult1d1,DIO2,SULT2A1,UGT2A3,UGT1A7 (includes others),SULT1B1
PXR/RXR Activation	9.82		PPARA,CYP3A7,SCD,ABCC2,CES3,SULT2A1,CYP1A2,ALDH1A1,CYP3A5,CYP7A1,CYP2A6 (includes others),CYP2B6,ABCC3,SLCO1B3,UGT1A7 (includes others),CYP2C8
LXR/RXR Activation	9.61	3.051	ABCG8,APOE,SCD,TTR,ABCG5,MLXIPL,ECHS1,NR1H4,APOC4,APOA2,SERPINF1,APOA5,IL18RAP,PON1,ALB,SREBF1,CYP7A1,SERPINA1,GC,IL1RAP,HADH
Valine Degradation I	8.91		ECHS1,ABAT,HIBADH,BCKDHA,ACAD8,DBT,ACADSB,SDS,ALDH6A1
Glycine Betaine Degradation	8.44		SARDH,BHMT,DMGDH,PIPOX,SHMT1,BHMT2,SDS
Dopamine Degradation	7.88		ALDH4A1,ALDH1B1,ALDH2,MAOB,ALDH1L1,ALDH1A1,SULT1C2,Sult1d1,SULT1B1,SULT2A1,ALDH7A1
Ethanol Degradation II	7.88		ALDH4A1,ALDH1B1,ALDH2,ALDH1L1,ADH7,ACSS3,ALDH1A1,PECR,ADHFE1,ACSL1,ALDH7A1
Acetone Degradation I (to Methylglyoxal)	7.76		CYP3A7,CYP2F1,CYP4F8,CYP1A2,CYP2E1,CYP3A5,ZADH2,CYP2A6 (includes others),CYP2B6,CYP2C8
Tyrosine Degradation I	7.48		GSTZ1,HPD,TAT,HGD,FAH
Bupropion Degradation	7.37		CYP3A7,CYP2F1,CYP4F8,CYP1A2,CYP2E1,CYP3A5,CYP2A6 (includes others),CYP2B6,CYP2C8
Ethanol Degradation IV	7.37		ALDH4A1,ALDH1B1,ALDH2,ALDH1L1,ACSS3,ALDH1A1,CAT,ACSL1,ALDH7A1
Bile Acid Biosynthesis, Neutral Pathway	7.32		BAAT,SLC27A5,CYP27A1,AKR1D1,CYP7A1,AKR1C4,CYP8B1
Oxidative Ethanol Degradation III	6.83		ALDH4A1,ALDH1B1,ALDH2,ALDH1L1,ACSS3,ALDH1A1,ACSL1,ALDH7A1
Superpathway of Citrulline Metabolism	6.77		LOC102724788/PRODH,OTC,ASL,GLS2,PRODH2,CPS1,ARG1
Estrogen Biosynthesis	6.43		CYP3A7,CYP2F1,CYP4F8,CYP1A2,CYP2E1,CYP3A5,CYP2A6 (includes others),CYP2B6,AKR1C4,CYP2C8
Noradrenaline and Adrenaline Degradation	6.43		ALDH4A1,ALDH1B1,ALDH2,MAOB,ALDH1L1,ADH7,ALDH1A1,PECR,ADHFE1,ALDH7A1
Tryptophan Degradation III (Eukaryotic)	6.16		AFMID,L3HYPDH,TDO2,HAAO,IDO2,KYNU,HADH,GCDH
Histidine Degradation III	5.77		FTCD,UROC1,HAL,MTHFD1,AMDHD1
Tryptophan Degradation to 2-amino-3-carboxymuconate Semialdehyde	5.77		AFMID,TDO2,HAAO,IDO2,KYNU
Antigen Presentation Pathway	5.63		HLA-G,HLA-DMA,HLA-A,HLA-DMB,CIITA,HLA-DQA1,PSMB8,HLA-DQB1,CD74
Aryl Hydrocarbon Receptor Signaling	5.56		GSTA3,ALDH1B1,ALDH4A1,GSTM5,NQO2,ALDH8A1,CCNA2,ALDH2,ALDH1L1,CYP1A2,ALDH1A1,DCT,ALDH5A1,ALDH6A1,MCM7,ALDH7A1,GSTK1
Citrulline Biosynthesis	5.43		LOC102724788/PRODH,OTC,GLS2,PRODH2,ARG1
Putrescine Degradation III	5.29		ALDH4A1,ALDH1B1,ALDH2,MAOB,ALDH1L1,ALDH1A1,ALDH7A1
Tryptophan Degradation X (Mammalian, via Tryptamine)	5.02		ALDH4A1,ALDH1B1,ALDH2,MAOB,ALDH1L1,ALDH1A1,ALDH7A1
Urea Cycle	4.83		OTC,ASL,CPS1,ARG1
Hepatic Cholestasis	4.82		PPARA,ABCG8,ABCG5,SLC10A1,CYP27A1,NR1H4,ABCC2,CYP8B1,IL18RAP,ADCY9,SREBF1,FGFR4,ADCY1,CYP7A1,ABCC3,IL1RAP,SLCO1B3
Histamine Degradation	4.7		ALDH4A1,ALDH1B1,ALDH2,ALDH1L1,ALDH1A1,ALDH7A1
Proline Degradation	4.49		ALDH4A1,LOC102724788/PRODH,PRODH2
Fatty Acid α-oxidation	4.3		ALDH4A1,ALDH1B1,ALDH2,ALDH1L1,ALDH1A1,ALDH7A1
Phenylalanine Degradation IV (Mammalian, via Side Chain)	4.29		ALDH2,MAOB,HPD,SLC27A2,GOT1
Fatty Acid β-oxidation I	4.26		SLC27A5,ECHS1,SLC27A2,IVD,SDS,HADH,ACSL1
Stearate Biosynthesis I (Animals)	4.18		BDH2,Ces1e,SLC27A5,SLC27A2,CYP2E1,ZADH2,DBT,ACSL1
NAD biosynthesis II (from tryptophan)	4.12		AFMID,TDO2,HAAO,IDO2,KYNU
Histidine Degradation VI	4.12		CYP46A1,UROC1,HAL,CYP2E1,AMDHD1
Coagulation System	3.99		PLG,KLKB1,SERPINC1,PROC,SERPINA1,F7,F13B
Sucrose Degradation V (Mammalian)	3.94		KHK,ALDOB,GALM,TKFC
Leucine Degradation I	3.94		MCCC1,IVD,HMGCL,MCCC2
Uracil Degradation II (Reductive)	3.9		DPYS,DPYD,UPB1
Thymine Degradation	3.9		DPYS,DPYD,UPB1
Phenylalanine Degradation I (Aerobic)	3.9		PAH,PCBD1,QDPR
Superpathway of Methionine Degradation	3.83		PCCA,BHMT,MAT1A,GOT1,CTH,BHMT2,SUOX
Lysine Degradation II	3.51		AADAT,AASS,ALDH7A1
Lysine Degradation V	3.51		AADAT,PIPOX,ALDH7A1
T Helper Cell Differentiation	3.29		IL2RG,HLA-DMA,HLA-A,HLA-DMB,FCER1G,HLA-DQA1,IFNGR1,HLA-DQB1,STAT1
Heparan Sulfate Biosynthesis (Late Stages)	3.2		Ces2a,AADAC,Ces1e,SULT1C2,Ces1b/Ces1c,CES3,Sult1d1,SULT1B1,SULT2A1
Retinoate Biosynthesis I	3.19		ADH7,ALDH1A1,RDH16,ALDH8A1,Rdh7,AKR1C4
Autoimmune Thyroid Disease Signaling	3.17		HLA-G,HLA-DMA,HLA-A,HLA-DMB,FCER1G,HLA-DQA1,HLA-DQB1
Graft-versus-Host Disease Signaling	3.11		HLA-G,HLA-DMA,HLA-A,HLA-DMB,FCER1G,HLA-DQA1,HLA-DQB1
Isoleucine Degradation I	3.1		ECHS1,ACAD8,ACADSB,SDS
β-alanine Degradation I	2.99		ABAT,ALDH6A1
Glycine Biosynthesis III	2.99		AGXT,AGXT2
L-cysteine Degradation III	2.99		MPST,GOT1
TR/RXR Activation	2.94		UCP2,PDE3B,SREBF1,FGFR4,CYP7A1,SLC16A2,APOA5,DIO2,RCAN2,THRSP
Heparan Sulfate Biosynthesis	2.92		Ces2a,AADAC,Ces1e,SULT1C2,Ces1b/Ces1c,CES3,Sult1d1,SULT1B1,SULT2A1
Sirtuin Signaling Pathway	2.92		PPARA,HIST1H1C,ARNTL,SDHB,TOMM40L,UCP2,TIMM9,NR1H4,NDUFB5,SIRT3,SOD3,SCNN1A,Hist1h1e,OTC,SREBF1,GABARAPL1,UQCRC2,HIST1H4J,PDK1,CPS1
Extrinsic Prothrombin Activation Pathway	2.86		SERPINC1,PROC,F7,F13B
Serotonin Receptor Signaling	2.64		ADCY9,GCH1,MAOB,ADCY1,PCBD1,QDPR
Altered T Cell and B Cell Signaling in Rheumatoid Arthritis	2.63		CXCL13,HLA-DMA,PRTN3,HLA-A,HLA-DMB,TLR1,FCER1G,HLA-DQA1,HLA-DQB1
Ubiquinol-10 Biosynthesis (Eukaryotic)	2.56		CYP46A1,CYP2E1,BCKDHA,ECHDC1
Glutathione-mediated Detoxification	2.55		Gstt3,GSTZ1,GSTA3,GSTM5,GSTK1
Type I Diabetes Mellitus Signaling	2.53		HLA-G,HLA-DMA,HLA-A,HLA-DMB,FCER1G,HLA-DQA1,IFNGR1,HLA-DQB1,STAT1,IL1RAP
Methionine Salvage II (Mammalian)	2.52		BHMT,BHMT2
4-hydroxyproline Degradation I	2.52		ALDH4A1,HOGA1
Tyrosine Biosynthesis IV	2.52		PAH,PCBD1
4-aminobutyrate Degradation I	2.52		ABAT,ALDH5A1
B Cell Development	2.32		HLA-DMA,HLA-A,HLA-DMB,HLA-DQA1,HLA-DQB1
Neuroprotective Role of THOP1 in Alzheimer's Disease	2.31		PLG,HLA-G,HGFAC,MME,DPP4,PRSS57,PRTN3,HLA-A,F7,Gzmb
Granulocyte Adhesion and Diapedesis	2.3		VCAM1,CXCL13,Ppbp,SDC2,MMP8,CXCL14,RDX,IL1RAP,ITGAL,Cxcl9,ITGB3,IL18RAP,MMP19
PPARα/RXRα Activation	2.28		PPARA,ADCY9,GHR,APOA2,ACOX1,Cyp2c70,ADCY1,Cyp2c44,GNA14,Cyp2c54 (includes others),IL1RAP,IL18RAP,CYP2C8
Branched-chain α-keto acid Dehydrogenase Complex	2.23		BCKDHA,DBT
Arginine Degradation I (Arginase Pathway)	2.23		ALDH4A1,ARG1
Acetate Conversion to Acetyl-CoA	2.23		ACSS3,ACSL1
iCOS-iCOSL Signaling in T Helper Cells	2.21		IL2RG,HLA-DMA,HLA-A,FGFR4,HLA-DMB,FCER1G,HLA-DQA1,VAV1,HLA-DQB1,LCP2
Triacylglycerol Degradation	2.18		Ces2a,AADAC,Ces1e,CES1,Ces1b/Ces1c,CES3
Role of NFAT in Regulation of the Immune Response	2.16		HLA-A,GNG2,HLA-DQA1,HLA-DQB1,GNA14,HLA-DMA,FGFR4,HLA-DMB,FCER1G,LYN,RCAN2,FCGR3A/FCGR3B,LCP2
Fatty Acid Activation	2.14		SLC27A5,SLC27A2,ACSL1
Oleate Biosynthesis II (Animals)	2.14		SCD,FADS6,ALDH6A1
IL-4 Signaling	2.12		IL2RG,HLA-DMA,HLA-A,FGFR4,HLA-DMB,HLA-DQA1,NR3C2,HLA-DQB1
OX40 Signaling Pathway	2.06		HLA-G,TNFSF4,HLA-DMA,HLA-A,HLA-DMB,FCER1G,HLA-DQA1,HLA-DQB1
Eumelanin Biosynthesis	2.02		DDT,DCT
Glutamate Degradation III (via 4-aminobutyrate)	2.02		ABAT,ALDH5A1
Folate Polyglutamylation	2.02		SHMT1,MTHFD1
Production of Nitric Oxide and Reactive Oxygen Species in Macrophages	2.01		PPARA,APOE,PON1,ALB,MPO,APOC4,FGFR4,APOA2,CAT,SERPINA1,IFNGR1,IRF8,STAT1
Intrinsic Prothrombin Activation Pathway	1.98		KLKB1,SERPINC1,PROC,COL18A1,F13B
Retinol Biosynthesis	1.98		AADAC,Ces1e,CES1,CES3,ESD
Adipogenesis pathway	1.96		NR1D2,ARNTL,FZD4,SREBF1,FGFR4,HDAC11,CEBPA,CEBPD,FABP4,FGFRL1
Nur77 Signaling in T Lymphocytes	1.95		HLA-DMA,HLA-A,HLA-DMB,FCER1G,HLA-DQA1,HLA-DQB1
Glutaryl-CoA Degradation	1.88		L3HYPDH,HADH,GCDH
Arginine Biosynthesis IV	1.85		OTC,ASL
γ-linolenate Biosynthesis II (Animals)	1.8		SLC27A5,SLC27A2,ACSL1
Mitochondrial L-carnitine Shuttle Pathway	1.8		SLC27A5,SLC27A2,ACSL1
Th1 and Th2 Activation Pathway	1.8		IL2RG,TNFSF4,HLA-DMA,HLA-A,IKZF1,FGFR4,HLA-DMB,HLA-DQA1,VAV1,IFNGR1,HLA-DQB1,STAT1
Allograft Rejection Signaling	1.75		HLA-G,HLA-DMA,HLA-A,HLA-DMB,FCER1G,HLA-DQA1,HLA-DQB1
Calcium-induced T Lymphocyte Apoptosis	1.73		HLA-DMA,HLA-A,HLA-DMB,FCER1G,HLA-DQA1,HLA-DQB1
IL-12 Signaling and Production in Macrophages	1.72		APOE,PON1,ALB,APOC4,FGFR4,APOA2,SERPINA1,IFNGR1,IRF8,STAT1
Ceramide Degradation	1.72		NAAA,ASAH2
Chondroitin Sulfate Biosynthesis (Late Stages)	1.71		CSGALNACT2,SULT1C2,Sult1d1,SULT1B1,SULT2A1
Atherosclerosis Signaling	1.68		APOE,PON1,ALB,VCAM1,APOC4,APOA2,SERPINA1,CCR2,COL18A1
Th2 Pathway	1.65		IL2RG,TNFSF4,HLA-DMA,HLA-A,IKZF1,FGFR4,HLA-DMB,HLA-DQA1,VAV1,HLA-DQB1
Granzyme A Signaling	1.61		HIST1H1C,Hist1h1e,HMGB2
Superoxide Radicals Degradation	1.6		CAT,SOD3
Caveolar-mediated Endocytosis Signaling	1.59		ALB,ITGA2B,HLA-A,ITGAL,ITGB7,ITGB3
CD28 Signaling in T Helper Cells	1.59		HLA-DMA,HLA-A,FGFR4,HLA-DMB,FCER1G,HLA-DQA1,VAV1,HLA-DQB1,LCP2
Th1 Pathway	1.53		HLA-DMA,HLA-A,FGFR4,HLA-DMB,HLA-DQA1,VAV1,IFNGR1,HLA-DQB1,STAT1
Sphingosine and Sphingosine-1-phosphate Metabolism	1.5		NAAA,ASAH2
Folate Transformations I	1.5		SHMT1,MTHFD1
Melatonin Degradation III	1.5		MPO
L-cysteine Degradation II	1.5		CTH
Adenine and Adenosine Salvage VI	1.5		ADK
Citrulline Degradation	1.5		OTC
Sulfite Oxidation IV	1.5		SUOX
4-hydroxybenzoate Biosynthesis	1.5		TAT
4-hydroxyphenylpyruvate Biosynthesis	1.5		TAT
Chondroitin Sulfate Biosynthesis	1.45		CSGALNACT2,SULT1C2,Sult1d1,SULT1B1,SULT2A1
Glutamate Receptor Signaling	1.45		SLC17A8,HOMER2,SLC17A2,GNG2,SLC1A2
Dopamine Receptor Signaling	1.44		ADCY9,GCH1,MAOB,ADCY1,PCBD1,QDPR
Ketogenesis	1.41		BDH2,HMGCL
Dermatan Sulfate Biosynthesis	1.4		CSGALNACT2,SULT1C2,Sult1d1,SULT1B1,SULT2A1
TCA Cycle II (Eukaryotic)	1.4		SDHB,DHTKD1,FH
Dendritic Cell Maturation	1.34		HLA-DMA,HLA-A,FGFR4,HLA-DMB,FCER1G,HLA-DQA1,HLA-DQB1,IRF8,COL18A1,STAT1,FCGR3A/FCGR3B
Acute Phase Response Signaling	1.33		PLG,KLKB1,ALB,TTR,MBL2,APOA2,SERPINF1,SERPINA1,IL1RAP,SAA2-SAA4

## Sheet: 3. KEGG ERG-vs-CTRL INF
Term	Count	%	PValue	Genes	Fold Enrichment	Bonferroni	Benjamini	FDR
mmu01100:Metabolic pathways	223	12.794	1.13918e-14	LDHC, SC5D, BTD, EPT1, GLDC, FAH, GOT2, MAT1A, AADAT, CYP3A16, CYP3A13, UGCG, CYP26A1, CYP2E1, CYP1A2, LPCAT2, GLUL, NME1, BHMT, MGAM, ABAT, PLA2G2D, MPST, HSD17B10, CHKA, NAGS, ENPP3, CYP2B9, ALDOB, PEMT, GCSH, IDH1, GCNT1, MOCS1, GCDH, ST6GAL1, MOCS2, UPB1, MAOA, MAOB, HGD, ACACB, PON1, PRODH2, AGXT2, CYP8B1, ALG14, CYP2J5, ARSB, ATP5E, SEPHS2, CYP2J6, RDH9, MTHFD1, MCCC2, P4HA3, GSTZ1, AGPAT3,…	1.59795	3.24762e-12	3.24762e-12	1.51545e-11
mmu04610:Complement and coagulation cascades	35	2.00803	5.14544e-14	MBL1, MBL2, MASP2, F13B, FGG, SERPINA1B, FGA, SERPINA1A, FGB, SERPINA1D, KLKB1, SERPINA1C, SERPINC1, KNG1, F11, F12, KNG2, CR2, F10, HC, F9, SERPINA1E, F7, PLG, C8G, PROC, C8A, C8B, CD55, F5, SERPINF2, F3, F2, SERPIND1, CPB2	4.21739	1.45985e-11	7.29927e-12	6.81122e-11
mmu05204:Chemical carcinogenesis	32	1.83592	3.72432e-09	CYP2C68, CYP2B9, UGT2B1, ADH5, ADH7, GSTM7, GSTM2, GSTM4, UGT1A6B, UGT1A6A, GSTK1, ADH4, CYP3A41A, CYP2C70, CYP2C37, CYP2C54, CYP3A16, SULT2A1, CYP3A13, NAT1, CYP2C29, CYP2B13, CYP1A2, CYP2E1, GSTT3, UGT1A1, CYP2C50, UGT2B5, CYP2C38, CYP2C39, MGST1, MGST2	3.18531	1.05771e-06	3.52569e-07	4.93521e-06
mmu00260:Glycine, serine and threonine metabolism	19	1.09007	4.40113e-08	SHMT1, MAOA, AMT, MAOB, GCAT, GRHPR, AGXT, GLDC, ALDH7A1, CTH, SDS, BHMT, GCSH, DMGDH, AGXT2, GAMT, GNMT, SARDH, CBS	4.34994	1.24991e-05	3.1248e-06	5.83206e-05
mmu04146:Peroxisome	28	1.60643	8.7983e-08	ACOX2, HACL1, ACOX1, PEX6, PRDX1, AGXT, FAR1, FAR2, ACSL1, GSTK1, MPV17L, NUDT7, PXMP4, PEX14, ABCD3, PXMP2, IDH1, CAT, HSD17B4, HMGCL, ACSL5, NUDT12, AMACR, SOD1, PHYH, HAO1, BAAT, SLC27A2	3.08937	2.49869e-05	4.99742e-06	0.000116589
mmu00830:Retinol metabolism	29	1.6638	1.13618e-07	CYP2C68, CYP2B9, UGT2B1, ADH5, ADH7, RDH9, UGT1A6B, UGT1A6A, ADH4, CYP3A41A, CYP2C70, CYP2C37, CYP2C54, CYP3A16, CYP3A13, CYP2C29, CYP26A1, CYP2B13, CYP1A2, UGT1A1, CYP2C50, RDH11, RDH10, DHRS3, UGT2B5, AOX3, CYP2C38, RDH16, CYP2C39	2.98399	3.22669e-05	5.37789e-06	0.000150558
mmu00140:Steroid hormone biosynthesis	28	1.60643	2.61394e-07	HSD3B2, CYP2D10, HSD17B2, CYP2C68, CYP2B9, UGT2B1, UGT1A6B, UGT1A6A, CYP3A41A, SRD5A2, SULT1E1, CYP2C70, CYP2C37, CYP3A16, CYP2C54, CYP3A13, CYP2C29, CYP2B13, CYP2E1, CYP1A2, UGT1A1, CYP2C50, CYP7B1, UGT2B5, CYP2D26, CYP2C38, CYP2C39, AKR1D1	2.94733	7.42331e-05	1.06051e-05	0.00034638
mmu04640:Hematopoietic cell lineage	26	1.49168	1.72925e-06	CD3G, CR2, CD8A, FLT3, KIT, ITGA4, IL7R, CD24A, GP9, CD55, GP5, CD37, CD19, CD44, TFRC, GP1BB, CD2, MS4A1, CD22, CD4, EPOR, GP1BA, IL5RA, CD5, CSF2RA, ITGA2B	2.83455	0.000490988	6.13866e-05	0.00229146
mmu05322:Systemic lupus erythematosus	36	2.0654	5.34073e-06	HIST1H2AB, HIST1H4K, HIST1H2AE, HIST1H2BM, HIST1H2BJ, HIST1H4F, HIST3H2A, HIST1H4D, HIST1H4J, CD28, HIST2H3B, HIST1H2BB, HIST1H2BE, HC, HIST1H2BG, ELANE, HIST1H2BH, FCGR4, H2-DMB1, H2-AB1, H2-DMB2, C8G, HIST2H4, C8A, C8B, HIST2H2BB, H2-OA, H2-OB, HIST1H3A, HIST1H3B, H2-AA, HIST1H3D, HIST1H3E, H2-DMA, CTSG, HIST1H3I	2.24272	0.00151562	0.000168516	0.00707692
mmu04662:B cell receptor signaling pathway	22	1.26219	1.01038e-05	PIK3CG, PTPN6, VAV3, CR2, PIK3CD, MALT1, VAV1, BTK, CARD11, CD19, DAPP1, RAC2, RASGRP3, PLCG2, CD22, CD79B, PIK3R5, INPP5D, AKT3, SYK, BLNK, NFATC1	2.87816	0.00286538	0.000286908	0.013388
mmu04670:Leukocyte transendothelial migration	31	1.77854	1.06402e-05	ITGAL, CLDN3, SIPA1, ARHGAP35, ITGB2, CLDN14, VCAM1, ARHGAP5, RAC2, PTK2B, CXCR4, PIK3R5, RAPGEF3, RHOH, PIK3CG, ITK, VAV3, NCF2, NCF1, NCF4, PIK3CD, ITGA4, VAV1, VASP, PRKCB, CYBA, CYBB, RASSF5, PLCG2, CLDN1, CLDN2	2.34621	0.00301728	0.000274675	0.0140988
mmu05150:Staphylococcus aureus infection	18	1.0327	1.1216e-05	MBL1, ITGAL, MBL2, MASP2, HC, FCGR4, H2-DMB1, ITGB2, H2-AB1, PLG, H2-DMB2, FGG, H2-OA, H2-OB, H2-AA, H2-DMA, SELPLG, PTAFR	3.2968	0.00318028	0.000265411	0.0148616
mmu00591:Linoleic acid metabolism	18	1.0327	1.1216e-05	CYP2C70, CYP2J5, CYP2C37, CYP2C54, CYP3A16, CYP3A13, CYP2C68, CYP2J6, CYP2C29, CYP1A2, CYP2E1, CYP2C50, ALOX15, CYP3A41A, PLA2G12B, CYP2C38, CYP2C39, PLA2G2D	3.2968	0.00318028	0.000265411	0.0148616
mmu00120:Primary bile acid biosynthesis	10	0.573723	1.17792e-05	ACOX2, CYP7B1, BAAT, CYP27A1, HSD3B7, AMACR, HSD17B4, CYP8B1, AKR1D1, SLC27A5	5.72361	0.00333972	0.000257298	0.0156078
mmu02010:ABC transporters	17	0.97533	1.46101e-05	ABCA7, ABCB11, ABCA8B, ABCA8A, ABCA1, ABCB6, ABCG4, ABCA3, ABCA6, ABCG8, ABCG5, TAP1, ABCC4, ABCD3, ABCC2, ABCA13, ABCC6	3.38439	0.00414071	0.000296335	0.0193586
mmu00980:Metabolism of xenobiotics by cytochrome P450	20	1.14745	3.12886e-05	SULT2A1, UGT2B1, ADH5, ADH7, GSTT3, CYP1A2, CYP2E1, UGT1A1, DHDH, GSTM7, GSTM2, GSTM4, UGT1A6B, UGT1A6A, GSTK1, ADH4, UGT2B5, AKR7A5, MGST1, MGST2	2.8618	0.00884673	0.000592231	0.0414534
mmu00350:Tyrosine metabolism	15	0.860585	3.33466e-05	DDC, MAOA, MAOB, ADH5, HGD, ADH7, TAT, FAH, DCT, FAHD1, GOT2, ADH4, GSTZ1, AOX3, HPD	3.52222	0.0094259	0.000591738	0.0441796

## Sheet: 4. KEGG PZQ-vs-CTRL INF
Term	Count	%	PValue	Genes	Fold Enrichment	Bonferroni	Benjamini	FDR
mmu01100:Metabolic pathways	160	20.4342	1.39296e-31	CNDP1, ACSS3, AGXT, HIBADH, CMBL, FAH, FAHD1, GOT1, MAT1A, CYP7A1, RGN, CES1D, CES1E, HADH, CES1C, BPNT1, HMGCL, AADAT, ALDH6A1, AMY1, CYP2C54, CYP3A13, CYP3A11, HAL, QDPR, CYP2B13, CYP1A2, CYP2E1, CYP2B10, TAT, CYP2C50, BHMT, HSD11B1, ABAT, PCCA, MPST, PRODH, COASY, ACADSB, CYP3A25, CYP2C44, CYP2B9, ALDOB, PAH, ASL, AGMAT, ARG1, GALM, IVD, IDH1, ALDH4A1, GCSH, FH1, NADK2, GCDH, CYP2C37, ACY1, UP…	2.45931	3.44061e-29	3.44061e-29	1.80615e-28
mmu05204:Chemical carcinogenesis	32	4.08685	3.69844e-18	CYP3A25, CYP2C44, CYP2B9, UGT2B1, ADH7, GSTM1, UGT1A9, UGT1A6A, GSTK1, UGT1A5, UGT2A3, CYP2C70, CYP2C37, GSTA3, CYP2C54, SULT2A1, CYP3A13, SULT2A3, CYP3A11, CYP2C29, CYP2B13, CYP2E1, CYP1A2, GSTT3, CYP2B10, CYP2C50, UGT2B36, UGT2B34, UGT2B5, HSD11B1, CYP2C38, CYP2C39	6.83261	9.13515e-16	4.56757e-16	4.7955e-15
mmu00140:Steroid hormone biosynthesis	29	3.7037	7.44509e-16	CYP2D10, CYP3A25, CYP2C44, CYP2B9, HSD3B4, UGT2B1, UGT1A9, UGT1A6A, UGT1A5, CYP7A1, UGT2A3, CYP2C70, CYP2C37, CYP2C54, CYP3A13, CYP3A11, CYP2C29, CYP2B13, CYP2E1, CYP1A2, CYP2B10, CYP2C50, UGT2B36, UGT2B34, UGT2B5, HSD11B1, CYP2C38, CYP2C39, AKR1D1	6.54792	1.91958e-13	6.39488e-14	1.0103e-12
mmu00830:Retinol metabolism	29	3.7037	1.3404e-15	CYP3A25, CYP2C44, CYP2B9, UGT2B1, ADH7, ALDH1A1, UGT1A9, UGT1A6A, UGT1A5, UGT2A3, CYP2C70, CYP2C37, CYP2C54, CYP3A13, CYP3A11, CYP2C29, CYP2B13, CYP1A2, CYP2B10, CYP2C50, UGT2B36, UGT2B34, UGT2B5, CYP2A5, AOX3, CYP2C38, RDH16, CYP2C39, CYP2A4	6.40078	3.2907e-13	8.22675e-14	1.73195e-12
mmu00980:Metabolism of xenobiotics by cytochrome P450	20	2.55428	1.75739e-10	GSTA3, CYP2F2, SULT2A1, SULT2A3, UGT2B1, ADH7, GSTT3, CYP1A2, CYP2E1, DHDH, GSTM1, UGT1A9, UGT2B36, UGT2B34, UGT1A6A, GSTK1, UGT1A5, UGT2B5, HSD11B1, UGT2A3	6.13868	4.34076e-08	8.68151e-09	2.27868e-07
mmu00380:Tryptophan metabolism	17	2.17114	5.09553e-10	AADAT, GCDH, KYNU, MAOB, IDO2, ECHS1, CYP1A2, INMT, AFMID, TDO2, ALDH7A1, ALDH1B1, HAAO, ALDH2, AOX3, CAT, HADH	7.10519	1.2586e-07	2.09766e-08	6.607e-07
mmu00280:Valine, leucine and isoleucine degradation	18	2.29885	8.11033e-10	BCKDHA, ALDH6A1, ACADSB, ECHS1, HIBADH, DBT, MCCC2, ALDH7A1, ALDH1B1, IVD, MCCC1, ALDH2, ABAT, AOX3, ACAD8, HADH, HMGCL, PCCA	6.42887	2.00325e-07	2.86179e-08	1.05161e-06
mmu00053:Ascorbate and aldarate metabolism	13	1.66028	2.16273e-09	UGT2B1, UGDH, UGT2B36, UGT1A9, ALDH7A1, UGT2B34, ALDH1B1, UGT1A5, UGT1A6A, ALDH2, UGT2B5, RGN, UGT2A3	9.45811	5.34195e-07	6.67744e-08	2.80426e-06
mmu00260:Glycine, serine and threonine metabolism	15	1.91571	4.16522e-09	SHMT1, MAOB, GCAT, AGXT, PIPOX, ALDH7A1, CTH, SDS, BHMT, GCSH, DMGDH, AGXT2, GAMT, GNMT, SARDH	7.36641	1.02881e-06	1.14312e-07	5.40074e-06
mmu01130:Biosynthesis of antibiotics	34	4.34227	7.53847e-09	ALDOB, AASS, ECHS1, ASL, AGXT, CMBL, ARG1, GALM, GOT1, GCSH, RGN, IDH1, CAT, FH1, HADH, BPNT1, BCKDHA, AADAT, SHMT1, GCDH, ACY1, OTC, AK3, TAT, DBT, SDHB, CTH, ALDH7A1, SDS, ALDH1B1, HAO2, ALDH2, PCCA, PRODH	3.12097	1.862e-06	1.862e-07	9.77459e-06
mmu00040:Pentose and glucuronate interconversions	14	1.78799	9.73517e-09	UGT2B1, UGDH, DHDH, UGT1A9, UGT2B36, UGT2B34, ALDH1B1, UGT1A6A, UGT1A5, ALDH2, UGT2B5, UGT2A3, DCXR, XYLB	7.63924	2.40458e-06	2.18599e-07	1.26229e-05
mmu00983:Drug metabolism - other enzymes	16	2.04342	1.7525e-08	UPB1, UGT2B1, UPP2, DPYS, UGT1A9, UGT2B36, UGT2B34, UGT1A6A, UGT1A5, UGT2B5, CES2A, CES1D, DPYD, CES1E, UGT2A3, CES1C	6.16275	4.32866e-06	3.60722e-07	2.27234e-05
mmu04146:Peroxisome	20	2.55428	2.1065e-08	ACOX1, PEX6, EPHX2, PHYH, AGXT, PIPOX, PEX7, PECR, BAAT, ACSL1, GSTK1, MPV17L, NUDT7, HAO2, PXMP2, ABCD3, IDH1, CAT, SLC27A2, HMGCL	4.73344	5.20304e-06	4.00235e-07	2.73134e-05
mmu00982:Drug metabolism - cytochrome P450	17	2.17114	1.18945e-07	GSTA3, MAOB, UGT2B1, ADH7, CYP1A2, CYP2E1, GSTT3, GSTM1, UGT1A9, UGT2B36, UGT2B34, UGT1A6A, GSTK1, UGT1A5, UGT2B5, AOX3, UGT2A3	5.05976	2.93789e-05	2.09852e-06	0.000154227
mmu04976:Bile secretion	17	2.17114	3.52209e-07	ADCY1, ATP1B1, SULT2A1, AQP8, SULT2A3, SLC10A1, SLCO1B2, ABCG8, BAAT, ABCG5, ADCY9, CYP7A1, KCNN2, ABCC3, ABCC2, SLC27A5, NR1H4	4.70344	8.69918e-05	5.79969e-06	0.000456683
mmu00330:Arginine and proline metabolism	14	1.78799	6.04155e-07	L3HYPDH, ARG1, ALDH7A1, GOT1, CNDP1, ALDH1B1, MAOB, HOGA1, ALDH2, PRODH2, ALDH4A1, GAMT, AGMAT, PRODH	5.6125	0.000149215	9.3266e-06	0.000783361
mmu01230:Biosynthesis of amino acids	17	2.17114	1.36334e-06	AADAT, SHMT1, ACY1, OTC, ALDOB, PAH, CPS1, ASL, TAT, ARG1, ALDH7A1, CTH, GOT1, MAT1A, SDS, IDH1, GPT	4.28133	0.000336688	1.98083e-05	0.00176773
mmu00650:Butanoate metabolism	10	1.27714	4.24043e-06	ACSM3, ACSM1, ALDH5A1, L2HGDH, ABAT, ECHS1, BDH2, HADH, ACSM5, HMGCL	7.27547	0.00104684	5.81866e-05	0.00549812
mmu00591:Linoleic acid metabolism	13	1.66028	5.2023e-06	CYP2C70, CYP2C37, CYP3A25, CYP2C54, CYP3A13, CYP2C44, CYP3A11, CYP2C29, CYP1A2, CYP2E1, CYP2C50, CYP2C38, CYP2C39	5.10738	0.00128415	6.76279e-05	0.00674524
mmu00250:Alanine, aspartate and glutamate metabolism	11	1.40485	1.02962e-05	GLS2, GOT1, ALDH5A1, NIT2, ABAT, ALDH4A1, AGXT2, GPT, CPS1, ASL, AGXT	5.84004	0.00253994	0.00012715	0.0133495
mmu00340:Histidine metabolism	9	1.14943	1.47529e-05	AMDHD1, ALDH7A1, CNDP1, ALDH1B1, MAOB, FTCD, ALDH2, HAL, UROC1	7.36641	0.00363736	0.000173508	0.0191273
mmu00350:Tyrosine metabolism	11	1.40485	1.71511e-05	DCT, FAHD1, GOT1, MAOB, AOX3, HGD, GSTZ1, ADH7, TAT, HPD, FAH	5.54055	0.00422739	0.000192543	0.0222363
mmu00220:Arginine biosynthesis	8	1.02171	2.44276e-05	GLS2, ARG1, GOT1, ACY1, OTC, GPT, CPS1, ASL	8.27106	0.00601551	0.000262299	0.0316688
mmu00410:beta-Alanine metabolism	10	1.27714	2.65803e-05	ALDH6A1, ALDH7A1, CNDP1, ALDH1B1, UPB1, ALDH2, ABAT, ECHS1, DPYS, DPYD	5.95266	0.00654392	0.000273522	0.0344593
